# Supplementary material for: Exploring the Antiglioma Mechanisms of Luteolin Based on Network Pharmacology and Experimental Verification
Source: Hindawi journal article supplement (doi:10.1155/2021/7765658), 2021-11-27

Luteolin

Glioma

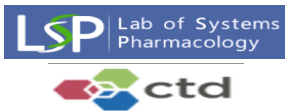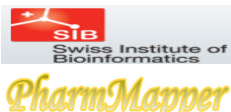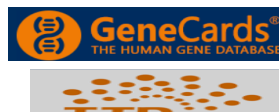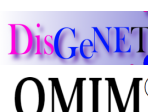

Targets from CTD, PharmMapper and SwissTargetPrediction

Targets from Genecards, DisGeNET, TTD and OMIM

Target genes

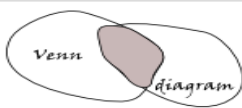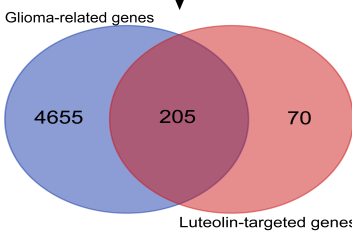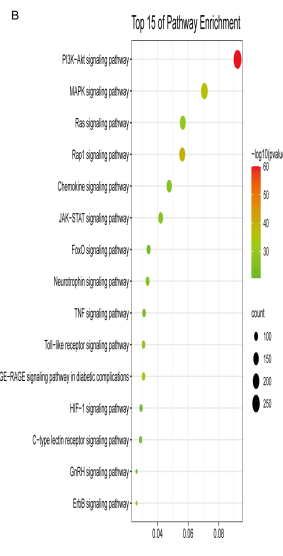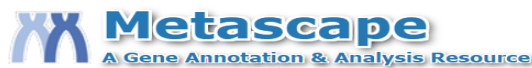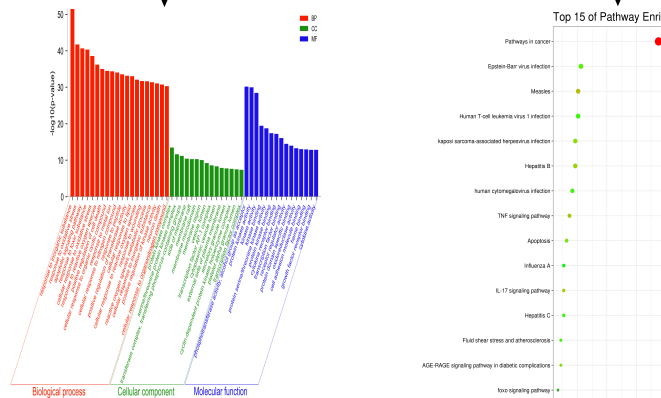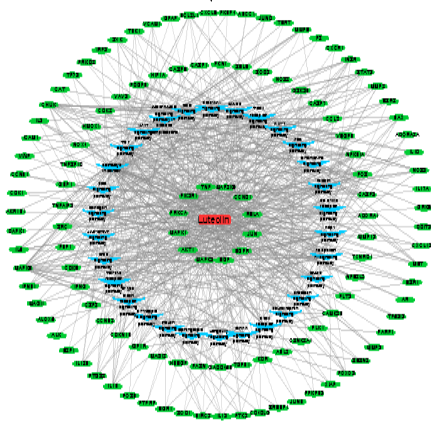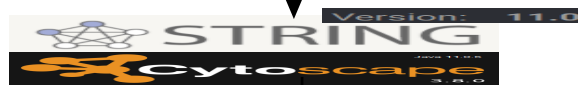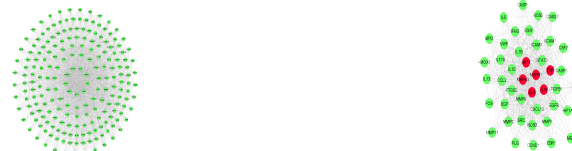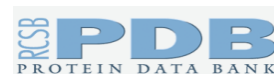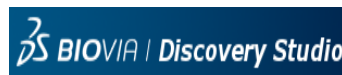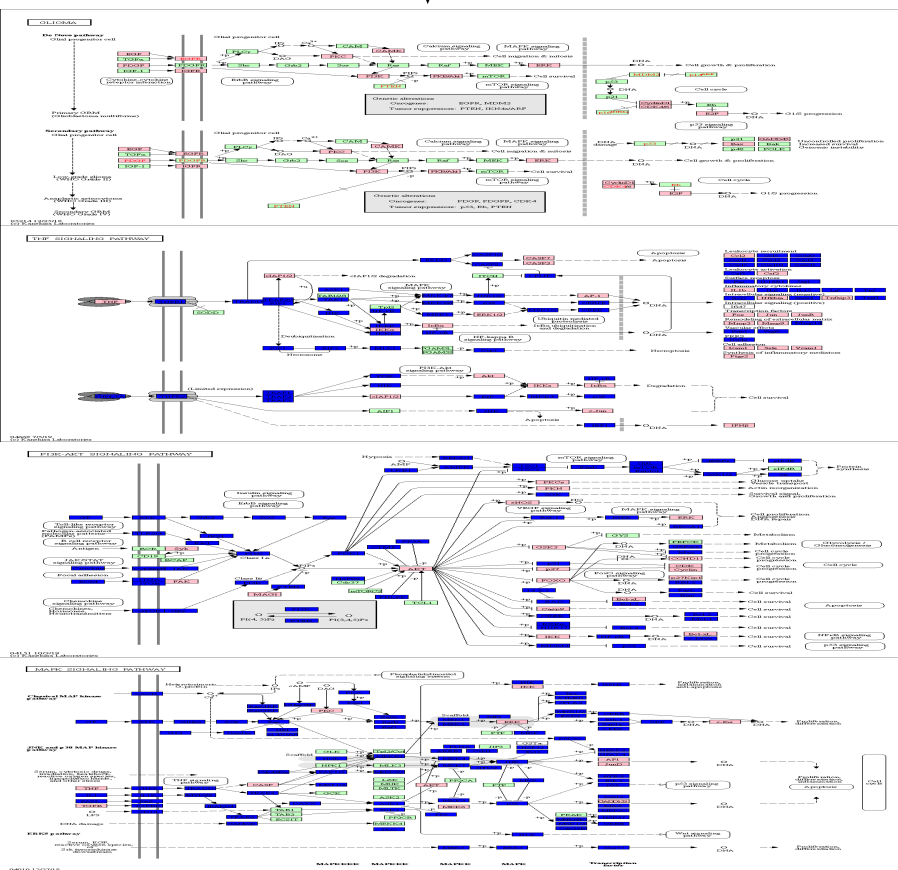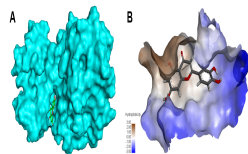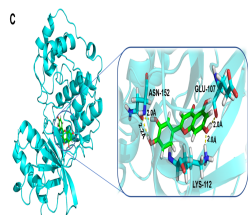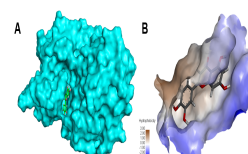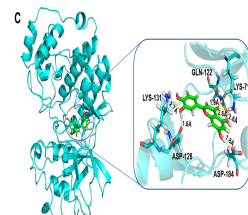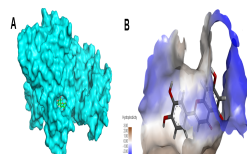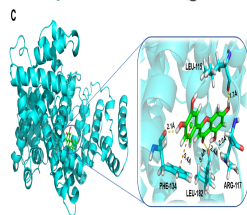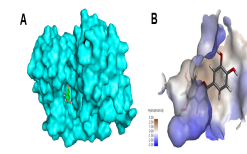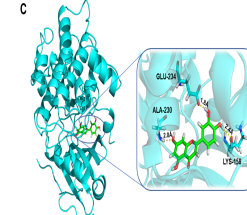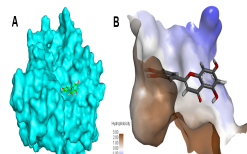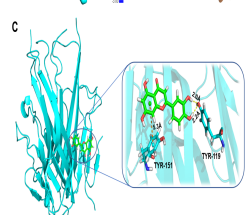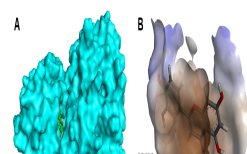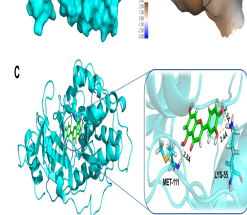

Experimental verification

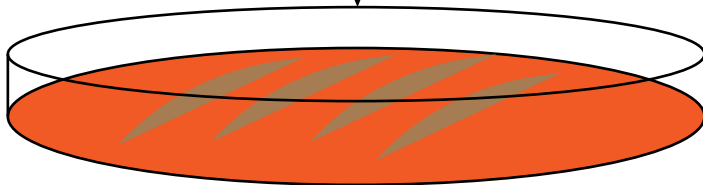

Supplement: f1 [file 7765658.f1.zip]
