# Supplementary material for: Exploring the Antiglioma Mechanisms of Luteolin Based on Network Pharmacology and Experimental Verification
Source: Hindawi journal article supplement (doi:10.1155/2021/7765658), 2021-11-27
Supplement: f1 [file 7765658.f1.zip]

## *Supplementary Material*

### **Exploring the anti-glioma mechanisms of luteolin based on network pharmacology and experimental verification**

Renxuan Huang, Rui Dong, Nan Wang, Beiwu Lan, Hongyang Zhao, Yufei Gao

**Table S1. Prediction targets of luteolin.**

| Uniport id | Gene Symbols |
|------------|--------------|
| P33527     | ABCC1        |
| Q92887     | ABCC2        |
| Q9UNQ0     | ABCG2        |
| P22303     | ACHE         |
| P09917     | ALOX5        |
| P08243     | ASNS         |
| Q07812     | BAX          |
| Q07817     | BCL2L1       |
| Q13490     | BIRC2        |
| P29466     | CASP1        |
| P42574     | CASP3        |
| P55210     | CASP7        |
| P55211     | CASP9        |
| P04040     | CAT          |
| P13500     | CCL2         |
| O76076     | CCN5         |
| P20248     | CCNA2        |
| P14635     | CCNB1        |
| P24385     | CCND1        |
| P29965     | CD40LG       |
| P04233     | CD74         |
| P19022     | CDH2         |
| P33151     | CDH5         |
| P46527     | CDKN1B       |
| P42773     | CDKN2C       |
| O15111     | CHUK         |
| P04141     | CSF2         |

|        |         |
|--------|---------|
| P48061 | CXCL12  |
| Q07325 | CXCL9   |
| P05177 | CYP1A2  |
| Q16678 | CYP1B1  |
| P33261 | CYP2C19 |
| P11712 | CYP2C9  |
| P05181 | CYP2E1  |
| P08684 | CYP3A4  |
| P20815 | CYP3A5  |
| P35638 | DDIT3   |
| P01133 | EGF     |
| P18146 | EGR1    |
| P05198 | EIF2S1  |
| O75460 | ERN1    |
| Q9Y624 | F11R    |
| P49327 | FASN    |
| P09467 | FBP1    |
| P01100 | FOS     |
| P53539 | FOSB    |
| O43524 | FOXO3   |
| O75293 | GADD45B |
| P48507 | GCLM    |
| P14136 | GFAP    |
| Q9HC97 | GPR35   |
| P07203 | GPX1    |
| Q99075 | HBEGF   |
| Q16665 | HIF1A   |
| P09601 | HMOX1   |
| P11021 | HSPA5   |
| P05362 | ICAM1   |
| P01574 | IFNB1   |
| P01579 | IFNG    |
| P22301 | IL10    |
| P29460 | IL12B   |
| P35225 | IL13    |
| Q16552 | IL17A   |
| P01584 | IL1B    |
| Q8NEV9 | IL27    |
| P08700 | IL3     |
| P05113 | IL5     |
| P06213 | INSR    |
| Q14653 | IRF3    |
| P05412 | JUN     |

|        |         |
|--------|---------|
| P17275 | JUNB    |
| P17535 | JUND    |
| P21397 | MAOA    |
| P28482 | MAPK1   |
| P27361 | MAPK3   |
| P45984 | MAPK9   |
| P45452 | MMP13   |
| P14780 | MMP9    |
| P05164 | MPO     |
| O94916 | NFAT5   |
| Q16236 | NFE2L2  |
| P25963 | NFKBIA  |
| P35228 | NOS2    |
| P29474 | NOS3    |
| Q99571 | P2RX4   |
| P01127 | PDGFB   |
| P14618 | PKM     |
| P53350 | PLK1    |
| P17252 | PRKCA   |
| P35354 | PTGS2   |
| Q05397 | PTK2    |
| Q9ULZ3 | PYCARD  |
| Q04206 | RELA    |
| P16581 | SELE    |
| P58004 | SESN2   |
| P31947 | SFN     |
| Q4U2R8 | SLC22A6 |
| P11169 | SLC2A3  |
| P14672 | SLC2A4  |
| P13866 | SLC5A1  |
| P00441 | SOD1    |
| P04179 | SOD2    |
| P36956 | SREBF1  |
| P40763 | STAT3   |
| Q9UHD2 | TBK1    |
| P01137 | TGFB1   |
| P01375 | TNF     |
| P21580 | TNFAIP3 |
| P50591 | TNFSF10 |
| P11387 | TOP1    |
| Q53FA7 | TP53I3  |
| Q9H3D4 | TP63    |
| O15350 | TP73    |

|        |         |
|--------|---------|
| Q16881 | TXNRD1  |
| P22309 | UGT1A1  |
| P35503 | UGT1A3  |
| Q9UKW4 | VAV3    |
| P19320 | VCAM1   |
| P04275 | VWF     |
| P56703 | WNT3    |
| P17861 | XBP1    |
| P47989 | XDH     |
| P98170 | XIAP    |
| Q9NPH5 | NOX4    |
| P15121 | AKR1B1  |
| Q15078 | CDK5R1  |
| Q00535 | CDK5    |
| P36888 | FLT3    |
| P00918 | CA2     |
| Q8WWL7 | CCNB3   |
| P06493 | CDK1    |
| O95067 | CCNB2   |
| P30542 | ADORA1  |
| P43166 | CA7     |
| Q04760 | GLO1    |
| P05067 | APP     |
| P43405 | SYK     |
| P49841 | GSK3B   |
| P09874 | PARP1   |
| P02766 | TTR     |
| O43570 | CA12    |
| P08253 | MMP2    |
| P22748 | CA4     |
| P39900 | MMP12   |
| P28907 | CD38    |
| O60218 | AKR1B10 |
| Q9H2K2 | TNKS2   |
| O95271 | TNKS    |
| P05089 | ARG1    |
| Q13332 | PTPRS   |
| P14061 | HSD17B1 |
| Q00534 | CDK6    |
| P08183 | ABCB1   |
| P37059 | HSD17B2 |
| P16050 | ALOX15  |
| P18054 | ALOX12  |

|        |         |
|--------|---------|
| Q92731 | ESR2    |
| P11511 | CYP19A1 |
| P29274 | ADORA2A |
| P68400 | CSNK2A1 |
| P03372 | ESR1    |
| P13569 | CFTR    |
| P04745 | AMY1B   |
| P43250 | GRK6    |
| P24941 | CDK2    |
| O14746 | TERT    |
| P00915 | CA1     |
| Q16790 | CA9     |
| P14679 | TYR     |
| P35869 | AHR     |
| P11474 | ESRRA   |
| P53355 | DAPK1   |
| P30518 | AVPR2   |
| P08069 | IGF1R   |
| P00533 | EGFR    |
| P00734 | F2      |
| P11309 | PIM1    |
| Q96GD4 | AURKB   |
| P21917 | DRD4    |
| P27986 | PIK3R1  |
| P06737 | PYGL    |
| P12931 | SRC     |
| P35968 | KDR     |
| P08254 | MMP3    |
| P07451 | CA3     |
| P23280 | CA6     |
| Q16512 | PKN1    |
| Q9ULX7 | CA14    |
| P08581 | MET     |
| P51955 | NEK2    |
| P25024 | CXCR1   |
| Q13554 | CAMK2B  |
| Q9UM73 | ALK     |
| P31749 | AKT1    |
| Q9HC98 | NEK6    |
| P04054 | PLA2G1B |
| P35218 | CA5A    |
| P56817 | BACE1   |
| P30530 | AXL     |

|        |          |
|--------|----------|
| O60285 | NUAK1    |
| P52895 | AKR1C2   |
| Q04828 | AKR1C1   |
| P42330 | AKR1C3   |
| P17516 | AKR1C4   |
| Q8N1Q1 | CA13     |
| P14550 | AKR1A1   |
| Q16875 | PFKFB3   |
| B2RXH2 | KDM4E    |
| P00747 | PLG      |
| P10275 | AR       |
| P01834 | IGKC     |
| P01857 | IGHG1    |
| P0CG47 | UBB      |
| P62987 | UBA52    |
| P62979 | RPS27A   |
| P0CG48 | UBC      |
| P42684 | ABL2     |
| P55263 | ADK      |
| P02768 | ALB      |
| Q9NZN5 | ARHGEF12 |
| P18440 | NAT1     |
| O14815 | CAPN9    |
| Q9UKF6 | CPSF3    |
| O15075 | DCLK1    |
| O00338 | SULT1C2  |
| P06746 | POLB     |
| Q01094 | E2F1     |
| P48449 | LSS      |
| O95718 | ESRRB    |
| Q02790 | FKBP4    |
| Q01543 | FLI1     |
| P51570 | GALK1    |
| P10144 | GZMB     |
| P08631 | HCK      |
| Q92826 | HOXB13   |
| Q9HCP0 | CSNK1G1  |
| O94966 | USP19    |
| Q9NWW6 | NMRK1    |
| Q9H3U1 | UNC45A   |
| Q86UL8 | MAGI2    |
| Q9BYC5 | FUT8     |
| Q9BZI7 | UPF3B    |

|        |         |
|--------|---------|
| Q14449 | GRB14   |
| O00151 | PDLIM1  |
| Q53H47 | SETMAR  |
| Q96C23 | GALM    |
| Q96SI9 | STRBP   |
| O14936 | CASK    |
| Q9BZL6 | PRKD2   |
| Q9Y5X1 | SNX9    |
| Q9BZC1 | CELF4   |
| Q9H2C0 | GAN     |
| P49765 | VEGFB   |
| Q9UPY3 | DICER1  |
| Q9Y265 | RUVBL1  |
| Q9Y696 | CLIC4   |
| Q9Y6I3 | EPN1    |
| P14091 | CTSE    |
| P28329 | CHAT    |
| Q96QZ7 | MAGI1   |
| Q6PML9 | SLC30A9 |
| Q9BV79 | MECR    |
| Q6NVY1 | HIBCH   |
| Q93034 | CUL5    |
| O76064 | RNF8    |
| P12694 | BCKDHA  |
| O75351 | VPS4B   |
| P32455 | GBP1    |
| P52564 | MAP2K6  |
| Q96H20 | SNF8    |
| Q9HCB6 | SPON1   |
| Q13705 | ACVR2B  |
| P19623 | SRM     |
| Q9BY41 | HDAC8   |
| P10586 | PTPRF   |

**Table S2. Prediction targets of glioma.**

| Uniport id | Gene Symbols |
|------------|--------------|
| Q9NQ94     | A1CF         |
| O95477     | ABCA1        |
| P78363     | ABCA4        |
| P08183     | ABCB1        |
| P21439     | ABCB4        |
| Q9NP58     | ABCB6        |

|        |         |
|--------|---------|
| P33527 | ABCC1   |
| O15438 | ABCC3   |
| O15439 | ABCC4   |
| O15440 | ABCC5   |
| O95255 | ABCC6   |
| P61221 | ABCE1   |
| Q9UNQ0 | ABCG2   |
| P24752 | ACAT1   |
| P12821 | ACE     |
| P25106 | ACKR3   |
| A6NK06 | ACOD1   |
| Q8WXI4 | ACOT11  |
| O00154 | ACOT7   |
| P15309 | ACP3    |
| Q8NEB7 | ACRBP   |
| Q96GR2 | ACSBG1  |
| P33121 | ACSL1   |
| O95573 | ACSL3   |
| O60488 | ACSL4   |
| Q9ULC5 | ACSL5   |
| Q9NR19 | ACSS2   |
| P60709 | ACTB    |
| Q562R1 | ACTBL2  |
| P68032 | ACTC1   |
| P63261 | ACTG1   |
| P63267 | ACTG2   |
| O96019 | ACTL6A  |
| O43707 | ACTN4   |
| P61160 | ACTR2   |
| Q04771 | ACVR1   |
| P36896 | ACVR1B  |
| P14621 | ACYP2   |
| P00813 | ADA     |
| Q9NZK5 | ADA2    |
| O14672 | ADAM10  |
| P78536 | ADAM17  |
| Q9P0K1 | ADAM22  |
| O75077 | ADAM23  |
| Q9UKQ2 | ADAM28  |
| Q13443 | ADAM9   |
| Q9UHI8 | ADAMTS1 |
| Q9UNA0 | ADAMTS5 |
| Q9UP79 | ADAMTS8 |



|        |           |
|--------|-----------|
| P55265 | ADAR      |
| P78563 | ADARB1    |
| Q9NS39 | ADARB2    |
| Q96PN6 | ADCY10    |
| Q08462 | ADCY2     |
| P40145 | ADCY8     |
| P18509 | ADCYAP1   |
| P41586 | ADCYAP1R1 |
| Q8N7X0 | ADGB      |
| O14514 | ADGRB1    |
| Q9UHX3 | ADGRE2    |
| Q9BY15 | ADGRE3    |
| P48960 | ADGRE5    |
| Q5T601 | ADGRF1    |
| Q9Y653 | ADGRG1    |
| Q9HBW9 | ADGRL4    |
| Q15848 | ADIPOQ    |
| Q96A54 | ADIPOR1   |
| P55263 | ADK       |
| P35318 | ADM       |
| P30542 | ADORA1    |
| P29274 | ADORA2A   |
| P25100 | ADRA1D    |
| P35348 | ADRA1A    |
| P18089 | ADRA2B    |
| P07550 | ADRB2     |
| P30566 | ADSL      |
| Q8IUX7 | AEBP1     |
| Q99490 | AGAP2     |
| Q15109 | AGER      |
| P52594 | AGFG1     |
| Q8N302 | AGGF1     |
| Q53H12 | AGK       |
| Q9UKV8 | AGO2      |
| O00116 | AGPS      |
| Q09666 | AHNAK     |
| P35869 | AHR       |
| O95433 | AHSA1     |
| Q9GZX7 | AICDA     |
| P55008 | AIF1      |
| O95831 | AIFM1     |
| O14862 | AIM2      |
| Q12904 | AIMP1     |

|        |          |
|--------|----------|
| Q13155 | AIMP2    |
| Q9UKB5 | AJAP1    |
| Q96IF1 | AJUBA    |
| Q02952 | AKAP12   |
| Q13023 | AKAP6    |
| P15121 | AKR1B1   |
| P31749 | AKT1     |
| Q96B36 | AKT1S1   |
| P31751 | AKT2     |
| Q9Y243 | AKT3     |
| P13716 | ALAD     |
| P02768 | ALB      |
| Q8TES7 | FBF1     |
| P00352 | ALDH1A1  |
| P47895 | ALDH1A3  |
| Q9UM73 | ALK      |
| Q9UHK6 | AMACR    |
| P02760 | AMBP     |
| P23109 | AMPD1    |
| P03950 | ANG      |
| Q15389 | ANGPT1   |
| O15123 | ANGPT2   |
| Q9Y264 | ANGPT4   |
| O95841 | ANGPTL1  |
| Q9UKU9 | ANGPTL2  |
| Q8N2N9 | ANKRD36B |
| Q8WVL7 | ANKRD49  |
| Q5XXA6 | ANO1     |
| Q4KMQ2 | ANO6     |
| P39687 | ANP32A   |
| P15144 | ANPEP    |
| P58335 | ANTXR2   |
| P04083 | ANXA1    |
| P07355 | ANXA2    |
| P08758 | ANXA5    |
| P08133 | ANXA6    |
| P20073 | ANXA7    |
| O95782 | AP2A1    |
| O14727 | APAF1    |
| P25054 | APC      |
| O95996 | APC2     |
| Q9UJX6 | ANAPC2   |
| Q9ULZ1 | APLN     |

|        |          |
|--------|----------|
| P35414 | APLNR    |
| Q9UH17 | APOBEC3B |
| P02655 | APOC2    |
| P05090 | APOD     |
| P02649 | APOE     |
| P05067 | APP      |
| Q06481 | APLP2    |
| Q8NEU8 | APPL2    |
| P07741 | APRT     |
| P29972 | AQP1     |
| P55087 | AQP4     |
| O14520 | AQP7     |
| O43315 | AQP9     |
| P10275 | AR       |
| P10398 | ARAF     |
| O60936 | NOL3     |
| Q7LC44 | ARC      |
| P48444 | ARCN1    |
| P15514 | AREG     |
| P62330 | ARF6     |
| Q53QZ3 | ARHGAP15 |
| Q8N264 | ARHGAP24 |
| Q9NRY4 | ARHGAP35 |
| Q9BRR9 | ARHGAP9  |
| P52565 | ARHGDIA  |
| O15085 | ARHGEF11 |
| Q92974 | ARHGEF2  |
| Q96DR7 | ARHGEF26 |
| Q8N1W1 | ARHGEF28 |
| Q15052 | ARHGEF6  |
| Q14155 | ARHGEF7  |
| P36404 | ARL2     |
| P36405 | ARL3     |
| P40617 | ARL4A    |
| P49703 | ARL4D    |
| O00327 | ARNTL    |
| P52961 | ART1     |
| Q8N9N2 | ASCC1    |
| P50553 | ASCL1    |
| Q16515 | ASIC2    |
| Q9UHC3 | ASIC3    |
| Q96FT7 | ASIC4    |
| P04424 | ASL      |

|        |          |
|--------|----------|
| P45381 | ASPA     |
| Q86U10 | ASPG     |
| Q8IZT6 | ASPM     |
| P15336 | ATF2     |
| P18848 | ATF4     |
| Q9Y2D1 | ATF5     |
| P18850 | ATF6     |
| Q8WYN0 | ATG4A    |
| Q96DT6 | ATG4C    |
| Q86TL0 | ATG4D    |
| O95352 | ATG7     |
| P31939 | ATIC     |
| Q13315 | ATM      |
| P54259 | ATN1     |
| P05023 | ATP1A1   |
| P13637 | ATP1A3   |
| P14415 | ATP1B2   |
| Q9Y6H3 | ATP23    |
| O75787 | ATP6AP2  |
| Q04656 | ATP7A    |
| P20848 | SERPINA2 |
| Q13535 | ATR      |
| Q9H6X2 | ANTXR1   |
| O75882 | ATRN     |
| O14965 | AURKA    |
| Q96GD4 | AURKB    |
| Q9Y2T1 | AXIN2    |
| P30530 | AXL      |
| Q96A70 | AZIN2    |
| O43286 | B4GALT5  |
| Q9NXR7 | BABAM2   |
| Q92934 | BAD      |
| Q99933 | BAG1     |
| O95817 | BAG3     |
| Q13145 | BAMBI    |
| Q92560 | BAP1     |
| Q96QZ7 | MAGI1    |
| Q9NR55 | BATF3    |
| Q07812 | BAX      |
| Q96GW7 | BCAN     |
| P51572 | BCAP31   |
| P56945 | BCAR1    |
| P54687 | BCAT1    |

|        |         |
|--------|---------|
| O95999 | BCL10   |
| Q9C0K0 | BCL11B  |
| P10415 | BCL2    |
| Q07817 | BCL2L1  |
| Q9HB09 | BCL2L12 |
| Q92843 | BCL2L2  |
| P20749 | BCL3    |
| P41182 | BCL6    |
| Q6W2J9 | BCOR    |
| Q02338 | BDH1    |
| P30411 | BDKRB2  |
| P23560 | BDNF    |
| Q14457 | BECN1   |
| Q9BXY8 | BEX2    |
| P21810 | BGN     |
| Q8NFJ8 | BHLHE22 |
| O14503 | BHLHE40 |
| Q9C0J9 | BHLHE41 |
| Q9NZM4 | BICRA   |
| Q13489 | BIRC3   |
| O15392 | BIRC5   |
| P35226 | BMI1    |
| P12644 | BMP4    |
| P18075 | BMP7    |
| Q13873 | BMPR2   |
| Q12983 | BNIP3   |
| Q12830 | BPTF    |
| P15056 | BRAF    |
| Q6UWU4 | C6orf89 |
| Q7Z569 | BRAP    |
| P38398 | BRCA1   |
| P51587 | BRCA2   |
| P46736 | BRCC3   |
| O60885 | BRD4    |
| Q9NPI1 | BRD7    |
| Q9H0E9 | BRD8    |
| Q9HCU9 | BRMS1   |
| Q5PSV4 | BRMS1L  |
| P32247 | BRS3    |
| P35613 | BSG     |
| Q9BSF8 | BTBD10  |
| O00478 | BTN3A3  |
| P20290 | BTF3    |

|        |          |
|--------|----------|
| P78410 | BTN3A2   |
| P62324 | BTG1     |
| P78543 | BTG2     |
| Q06187 | BTK      |
| Q9Y297 | BTRC     |
| O43683 | BUB1     |
| Q9H8K7 | PAAT     |
| Q13901 | C1D      |
| Q07021 | C1QBP    |
| Q0P641 | C2orf80  |
| Q9NS85 | CA10     |
| O75493 | CA11     |
| Q9NS71 | GKN1     |
| P00918 | CA2      |
| Q16790 | CA9      |
| Q9Y376 | CAB39    |
| Q8IZS8 | CACNA2D3 |
| Q9HB71 | CACYBP   |
| Q9BY67 | CADM1    |
| Q8N3J6 | CADM2    |
| Q8N126 | CADM3    |
| Q8NFZ8 | CADM4    |
| P01258 | CALCA    |
| P06881 | CALCA    |
| P30988 | CALCR    |
| Q05682 | CALD1    |
| P0DP23 | CALM1    |
| P0DP24 | CALM2    |
| P0DP25 | CALM3    |
| P27482 | CALML3   |
| P27797 | CALR     |
| Q13554 | CAMK2B   |
| Q13555 | CAMK2G   |
| Q96RR4 | CAMKK2   |
| Q7Z624 | CAMKMT   |
| P49913 | CAMP     |
| Q96JM3 | CHAMP1   |
| P40121 | CAPG     |
| P04632 | CAPNS1   |
| Q9BWT7 | CARD10   |
| Q9BXL7 | CARD11   |
| Q6XLA1 | CASC2    |
| Q8IU53 | CASC2    |

|        |        |
|--------|--------|
| O14936 | CASK   |
| P07498 | CSN3   |
| P29466 | CASP1  |
| P42575 | CASP2  |
| P42574 | CASP3  |
| P55212 | CASP6  |
| Q14790 | CASP8  |
| P55211 | CASP9  |
| Q86V15 | CASZ1  |
| P04040 | CAT    |
| Q03135 | CAV1   |
| P51636 | CAV2   |
| Q6NZI2 | CAVIN1 |
| O95810 | CAVIN2 |
| P22681 | CBL    |
| Q13185 | CBX3   |
| P45973 | CBX5   |
| O95931 | CBX7   |
| Q8TAB7 | CCDC26 |
| P06307 | CCK    |
| P55774 | CCL18  |
| P13500 | CCL2   |
| P78556 | CCL20  |
| O00626 | CCL22  |
| P13501 | CCL5   |
| P80075 | CCL8   |
| O00622 | CCN1   |
| P29279 | CCN2   |
| P78396 | CCNA1  |
| P14635 | CCNB1  |
| O95067 | CCNB2  |
| P24385 | CCND1  |
| P30279 | CCND2  |
| P30281 | CCND3  |
| P24864 | CCNE1  |
| P41002 | CCNF   |
| Q16589 | CCNG2  |
| P51946 | CCNH   |
| P22674 | CCNO   |
| Q8ND76 | CCNY   |
| P46092 | CCR10  |
| P51679 | CCR4   |
| Q9UK39 | NOCT   |

|        |        |
|--------|--------|
| Q9ULM6 | CNOT6  |
| P51681 | CCR5   |
| P51684 | CCR6   |
| P32248 | CCR7   |
| P50991 | CCT4   |
| P50990 | CCT8   |
| Q6YHK3 | CD109  |
| P48509 | CD151  |
| Q86VB7 | CD163  |
| Q04900 | CD164  |
| P06729 | CD2    |
| P41217 | CD200  |
| P25063 | CD24   |
| P20963 | CD247  |
| P26842 | CD27   |
| Q9NZQ7 | CD274  |
| Q5ZPR3 | CD276  |
| P10747 | CD28   |
| P28906 | CD34   |
| P25942 | CD40   |
| P29965 | CD40LG |
| P16070 | CD44   |
| P15529 | CD46   |
| Q08722 | CD47   |
| P09326 | CD48   |
| P34810 | CD68   |
| P32970 | CD70   |
| P04233 | CD74   |
| P33681 | CD80   |
| P27701 | CD82   |
| P42081 | CD86   |
| Q9NPY3 | CD93   |
| P14209 | CD99   |
| Q12834 | CDC20  |
| P30304 | CDC25A |
| P30305 | CDC25B |
| P30307 | CDC25C |
| P60953 | CDC42  |
| O75419 | CDC45  |
| Q96GN5 | CDCA7L |
| P12830 | CDH1   |
| Q9UM11 | FZR1   |
| P55287 | CDH11  |



|        |         |
|--------|---------|
| P55290 | CDH13   |
| Q13634 | CDH18   |
| P19022 | CDH2    |
| Q9UJ99 | CDH22   |
| P55283 | CDH4    |
| P33151 | CDH5    |
| P06493 | CDK1    |
| Q15131 | CDK10   |
| O94921 | CDK14   |
| Q96Q40 | CDK15   |
| Q00536 | CDK16   |
| P24941 | CDK2    |
| O14519 | CDK2AP1 |
| O75956 | CDK2AP2 |
| P11802 | CDK4    |
| Q00535 | CDK5    |
| Q00534 | CDK6    |
| P50613 | CDK7    |
| P49336 | CDK8    |
| P38936 | CDKN1A  |
| P46527 | CDKN1B  |
| P49918 | CDKN1C  |
| P42771 | CDKN2A  |
| Q8N726 | CDKN2A  |
| P42772 | CDKN2B  |
| P42773 | CDKN2C  |
| P55273 | CDKN2D  |
| Q16667 | CDKN3   |
| Q99626 | CDX2    |
| P13688 | CEACAM1 |
| P06731 | CEACAM5 |
| P49715 | CEBPA   |
| P17676 | CEBPB   |
| P49716 | CEBPD   |
| Q03701 | CEBPZ   |
| Q92879 | CELF1   |
| O95319 | CELF2   |
| Q9HC77 | CENPJ   |
| Q71F23 | CENPU   |
| Q6ZU80 | CEP128  |
| Q53EZ4 | CEP55   |
| P27544 | CERS1   |
| O00748 | CES2    |

|        |        |
|--------|--------|
| Q9P2B7 | CFAP97 |
| P08603 | CFH    |
| P23528 | CFL1   |
| O15519 | CFLAR  |
| Q9BUX1 | CHAC1  |
| Q13111 | CHAF1A |
| O14646 | CHD1   |
| Q14839 | CHD4   |
| O00258 | GET1   |
| Q8TDI0 | CHD5   |
| Q9P2D1 | CHD7   |
| O14757 | CHEK1  |
| O96017 | CHEK2  |
| P36222 | CHI3L1 |
| P35790 | CHKA   |
| O00533 | CHL1   |
| Q96FC9 | DDX11  |
| Q8IZ52 | CHPF   |
| Q8WUD6 | CHPT1  |
| Q70JA7 | CHSY3  |
| Q9P2E5 | CHPF2  |
| Q99828 | CIB1   |
| Q96RK0 | CIC    |
| P33076 | CIITA  |
| Q9UPZ9 | CILK1  |
| Q8N5K1 | CISD2  |
| Q9NSE2 | CISH   |
| Q96RK1 | CITED4 |
| Q8WWK9 | CKAP2  |
| Q07065 | CKAP4  |
| Q14008 | CKAP5  |
| Q05315 | CLC    |
| Q9UBD9 | CLCF1  |
| P51788 | CLCN2  |
| P51790 | CLCN3  |
| P51793 | CLCN4  |
| P51795 | CLCN5  |
| P51798 | CLCN7  |
| O00501 | CLDN5  |
| Q9NY25 | CLEC5A |
| O00299 | CLIC1  |
| Q9Y696 | CLIC4  |
| P49759 | CLK1   |

|        |         |
|--------|---------|
| O15516 | CLOCK   |
| Q96KA5 | CLPTM1L |
| Q8IY22 | CMIP    |
| P30085 | CMPK1   |
| Q5EBM0 | CMPK2   |
| Q9NX76 | CMTM6   |
| P21554 | CNR1    |
| P26441 | CNTF    |
| P26992 | CNTFR   |
| Q12860 | CNTN1   |
| Q02246 | CNTN2   |
| Q9UHC6 | CNTNAP2 |
| P13942 | COL11A2 |
| P39060 | COL18A1 |
| P02461 | COL3A1  |
| P02462 | COL4A1  |
| Q01955 | COL4A3  |
| P20849 | COL9A1  |
| Q14055 | COL9A2  |
| Q14050 | COL9A3  |
| P49747 | COMP    |
| Q8NHY2 | COP1    |
| Q9Y678 | COPG1   |
| Q92905 | COPS5   |
| Q14019 | COTL1   |
| P00403 | MT-CO2  |
| P13073 | COX4I1  |
| P20674 | COX5A   |
| P10606 | COX5B   |
| P14406 | COX7A2  |
| P10176 | COX8A   |
| P00450 | CP      |
| Q9UI42 | CPA4    |
| P16870 | CPE     |
| Q9BZB8 | CPEB1   |
| Q8NE35 | CPEB3   |
| Q17RY0 | CPEB4   |
| P36551 | CPOX    |
| Q9Y646 | CPQ     |
| P16220 | CREB1   |
| Q96BA8 | CREB3L1 |
| P06850 | CRH     |
| P34998 | CRHR1   |

|        |          |
|--------|----------|
| P16562 | CRISP2   |
| P46108 | CRK      |
| Q8IUI8 | CRLF3    |
| Q14194 | CRMP1    |
| P02741 | CRP      |
| Q16526 | CRY1     |
| Q49AN0 | CRY2     |
| P02511 | CRYAB    |
| P09603 | CSF1     |
| P07333 | CSF1R    |
| P04141 | CSF2     |
| P09919 | CSF3     |
| P41240 | CSK      |
| Q6UVK1 | CSPG4    |
| P50461 | CSRP3    |
| P01034 | CST3     |
| Q15828 | CST6     |
| P78358 | CTAG1A   |
| Q13363 | CTBP1    |
| P56545 | CTBP2    |
| Q2NKJ3 | CTC1     |
| P16410 | CTLA4    |
| P35222 | CTNNB1   |
| Q9NSA3 | CTNNBIP1 |
| O60716 | CTNND1   |
| Q9UQB3 | CTNND2   |
| P07858 | CTSB     |
| P07339 | CTSD     |
| P43235 | CTSK     |
| P07711 | CTSL     |
| Q14247 | CTTN     |
| Q9H467 | CUEDC2   |
| Q13616 | CUL1     |
| P39880 | CUX1     |
| Q13948 | CUX1     |
| P49238 | CX3CR1   |
| P09341 | CXCL1    |
| P02778 | CXCL10   |
| O14625 | CXCL11   |
| P48061 | CXCL12   |
| O95715 | CXCL14   |
| Q9H2A7 | CXCL16   |
| Q6UXB2 | CXCL17   |

|        |         |
|--------|---------|
| P10145 | CXCL8   |
| Q07325 | CXCL9   |
| P25025 | CXCR2   |
| P49682 | CXCR3   |
| P61073 | CXCR4   |
| O00574 | CXCR6   |
| P08574 | CYC1    |
| Q8WWM9 | CYGB    |
| Q9NQC7 | CYLD    |
| P05093 | CYP17A1 |
| P11511 | CYP19A1 |
| P04798 | CYP1A1  |
| Q16678 | CYP1B1  |
| O15528 | CYP27B1 |
| P20813 | CYP2B6  |
| P11712 | CYP2C9  |
| P10635 | CYP2D6  |
| P05181 | CYP2E1  |
| P51589 | CYP2J2  |
| P13584 | CYP4B1  |
| Q8N118 | CYP4X1  |
| Q86T65 | DAAM2   |
| Q9UI36 | DACH1   |
| Q5SW24 | DACT2   |
| Q14118 | DAG1    |
| P0C864 | DANCR   |
| P14920 | DAO     |
| O95886 | DLGAP3  |
| P51398 | DAP3    |
| Q9UIK4 | DAPK2   |
| Q9UER7 | DAXX    |
| Q16643 | DBN1    |
| Q10586 | DBP     |
| P11182 | DBT     |
| Q9Y4B6 | DCAF1   |
| P43146 | DCC     |
| P27707 | DCK     |
| P07585 | DCN     |
| P40126 | DCT     |
| Q9UJW0 | DCTN4   |
| O00399 | DCTN6   |
| Q96GG9 | DCUN1D1 |
| O43602 | DCX     |

|        |        |
|--------|--------|
| P0DPQ6 | DDIT3  |
| P35638 | DDIT3  |
| Q9NX09 | DDIT4  |
| Q08345 | DDR1   |
| Q9BUQ8 | DDX23  |
| P17844 | DDX5   |
| Q5T1V6 | DDX59  |
| P26196 | DDX6   |
| Q16698 | DECR1  |
| Q9P2X7 | DELEC1 |
| O43583 | DENR   |
| Q5TB30 | DEPDC1 |
| Q9BUN8 | DERL1  |
| P17661 | DES    |
| Q15392 | DHCR24 |
| Q86SQ9 | DHDDS  |
| O43143 | DHX15  |
| Q9NR28 | DIABLO |
| O60610 | DIAPH1 |
| Q9UPY3 | DICER1 |
| O95057 | DIRAS1 |
| O95661 | DIRAS3 |
| Q155Q3 | DIXDC1 |
| O60832 | DKC1   |
| O94907 | DKK1   |
| Q9UBP4 | DKK3   |
| O43261 | DLEU1  |
| P80370 | DLK1   |
| O00548 | DLL1   |
| Q9NYJ7 | DLL3   |
| Q9NR61 | DLL4   |
| Q9UGM3 | DMBT1  |
| Q9Y485 | DMXL1  |
| Q96EY1 | DNAJA3 |
| O14645 | DNALI1 |
| Q05193 | DNM1   |
| O00429 | DNM1L  |
| P50570 | DNM2   |
| Q9UQ16 | DNM3   |
| P26358 | DNMT1  |
| Q9Y6K1 | DNMT3A |
| Q9UBC3 | DNMT3B |
| Q14185 | DOCK1  |

|        |         |
|--------|---------|
| P16444 | DPEP1   |
| Q92785 | DPF2    |
| P27487 | DPP4    |
| P21918 | DRD5    |
| Q02487 | DSC2    |
| Q14574 | DSC3    |
| Q9NZW4 | DSPP    |
| P60981 | DSTN    |
| Q8TDB6 | DTX3L   |
| P28562 | DUSP1   |
| Q05923 | DUSP2   |
| Q9BV47 | DUSP26  |
| Q13115 | DUSP4   |
| O14640 | DVL1    |
| P54792 | DVL1P1  |
| O14641 | DVL2    |
| Q7RTS9 | DYM     |
| Q8NCM8 | DYNC2H1 |
| Q96FJ2 | DYNLL2  |
| Q13627 | DYRK1A  |
| Q92630 | DYRK2   |
| Q01094 | E2F1    |
| Q14209 | E2F2    |
| O00716 | E2F3    |
| Q96AV8 | E2F7    |
| O00559 | EBAG9   |
| Q14213 | EBI3    |
| Q15125 | EBP     |
| Q9H1Z8 | ECRG4   |
| Q9H8V3 | ECT2    |
| P05305 | EDN1    |
| P25101 | EDNRA   |
| P24530 | EDNRB   |
| P26641 | EEF1G   |
| O00418 | EEF2K   |
| Q12805 | EFEMP1  |
| P20827 | EFNA1   |
| P52799 | EFNB2   |
| Q15768 | EFNB3   |
| P01133 | EGF     |
| Q9UHF1 | EGFL7   |
| P00533 | EGFR    |
| Q96KS0 | EGLN2   |

|        |          |
|--------|----------|
| Q9H6Z9 | EGLN3    |
| P18146 | EGR1     |
| Q9BQI3 | EIF2AK1  |
| P56537 | EIF6     |
| Q14152 | EIF3A    |
| Q99613 | EIF3C    |
| O15371 | EIF3D    |
| Q13347 | EIF3I    |
| Q9UBQ5 | EIF3K    |
| P06730 | EIF4E    |
| Q13542 | EIF4EBP2 |
| Q15717 | ELAVL1   |
| Q99607 | ELF4     |
| P19419 | ELK1     |
| P28324 | ELK4     |
| O00472 | ELL2     |
| Q92556 | ELMO1    |
| Q9NXB9 | ELOVL2   |
| Q9NYP7 | ELOVL5   |
| Q5UCC4 | EMC10    |
| P54849 | EMP1     |
| P54851 | EMP2     |
| P54852 | EMP3     |
| Q04743 | EMX2     |
| P19622 | EN2      |
| P17813 | ENG      |
| P06733 | ENO1     |
| Q9UHY7 | ENOPH1   |
| Q7L5Y1 | ENOSF1   |
| P49961 | ENTPD1   |
| Q99814 | EPAS1    |
| P21709 | EPHA1    |
| P29317 | EPHA2    |
| P29320 | EPHA3    |
| P54764 | EPHA4    |
| P54756 | EPHA5    |
| P29322 | EPHA8    |
| P29323 | EPHB2    |
| P54760 | EPHB4    |
| Q9H201 | EPN3     |
| P01588 | EPO      |
| P11678 | EPX      |
| P19235 | EPOR     |



|        |         |
|--------|---------|
| Q12929 | EPS8    |
| Q8TE68 | EPS8L1  |
| P04626 | ERBB2   |
| P21860 | ERBB3   |
| P07992 | ERCC1   |
| P18074 | ERCC2   |
| Q92889 | ERCC4   |
| P28715 | ERCC5   |
| O14944 | EREG    |
| O75460 | ERN1    |
| Q69383 | ERVK-6  |
| Q69384 | ERVK-6  |
| Q7LDI9 | ERVK-6  |
| Q9BXR3 | ERVK-6  |
| Q9Y6I0 | ERVK-6  |
| Q9UQF0 | ERVW-1  |
| Q9NQ30 | ESM1    |
| P03372 | ESR1    |
| Q92731 | ESR2    |
| P11474 | ESRRA   |
| P13804 | ETFA    |
| P14921 | ETS1    |
| P43268 | ETV4    |
| Q16394 | EXT1    |
| O95677 | EYA4    |
| Q92800 | EZH1    |
| Q15910 | EZH2    |
| P15311 | EZR     |
| P00742 | F10     |
| Q9BQ89 | FAM110A |
| Q9Y624 | F11R    |
| P00734 | F2      |
| P25116 | F2R     |
| P55085 | F2RL1   |
| P13726 | F3      |
| O15540 | FABP7   |
| Q13158 | FADD    |
| O95990 | FAM107A |
| Q8N9E0 | FAM133A |
| A1KXE4 | FAM168B |
| Q8NEG4 | FAM83F  |
| Q9BXW9 | FANCD2  |
| Q12884 | FAP     |

|        |        |
|--------|--------|
| P25445 | FAS    |
| P48023 | FASLG  |
| P49327 | FASN   |
| Q14517 | FAT1   |
| Q8WUP2 | FBLIM1 |
| P09467 | FBP1   |
| Q9HAH7 | FBR5   |
| Q96ME1 | FBXL18 |
| Q9NRD0 | FBXO8  |
| Q969H0 | FBXW7  |
| P12319 | FCER1A |
| P12314 | FCGR1A |
| Q92637 | FCGR1B |
| P22570 | FDXR   |
| P22830 | FECH   |
| P39748 | FEN1   |
| A9Z1Z3 | FER1L4 |
| Q96AC1 | FERMT2 |
| Q86UX7 | FERMT3 |
| A0PJY2 | FEZF1  |
| P05230 | FGF1   |
| Q92913 | FGF13  |
| P09038 | FGF2   |
| P08620 | FGF4   |
| P21781 | FGF7   |
| P31371 | FGF9   |
| P21802 | FGFR2  |
| P22607 | FGFR3  |
| Q14314 | FGL2   |
| Q14192 | FHL2   |
| Q13643 | FHL3   |
| Q5TD97 | FHL5   |
| Q2V2M9 | FHOD3  |
| Q8IVF7 | FMNL3  |
| Q9Y3D6 | FIS1   |
| Q02790 | FKBP4  |
| Q13451 | FKBP5  |
| P11362 | FGFR1  |
| P20930 | FLG    |
| O75369 | FLNB   |
| Q14315 | FLNC   |
| Q14254 | FLOT2  |
| P17948 | FLT1   |

|        |           |
|--------|-----------|
| P49771 | FLT3LG    |
| P35916 | FLT4      |
| Q8TAF5 | FLVCR1-DT |
| Q06828 | FMOD      |
| Q8N0W7 | FMR1NB    |
| P02751 | FN1       |
| Q9Y2H6 | FNDC3A    |
| Q5VW36 | FOCAD     |
| Q04609 | FOLH1     |
| P01100 | FOS       |
| P53539 | FOSB      |
| P15407 | FOSL1     |
| P15408 | FOSL2     |
| P55317 | FOXA1     |
| Q9Y261 | FOXA2     |
| Q12948 | FOXC1     |
| Q99958 | FOXC2     |
| Q16676 | FOXD1     |
| O60548 | FOXD2     |
| P55316 | FOXG1     |
| P85037 | FOXK1     |
| Q01167 | FOXK2     |
| Q12952 | FOXL1     |
| Q12778 | FOXO1     |
| O43524 | FOXO3     |
| Q9H334 | FOXP1     |
| Q9BZS1 | FOXP3     |
| Q9C009 | FOXQ1     |
| Q6Pjq5 | FOXR2     |
| Q05932 | FPGS      |
| P21462 | FPR1      |
| P25090 | FPR2      |
| Q92837 | FRAT1     |
| P42685 | FRK       |
| Q9BTV5 | FSD1      |
| Q9BXM9 | FSD1L     |
| Q12841 | FSTL1     |
| P02794 | FTH1      |
| Q96AE4 | FUBP1     |
| P09958 | FURIN     |
| P35637 | FUS       |
| P22083 | FUT4      |
| Q16595 | FXN       |

|        |         |
|--------|---------|
| Q14332 | FZD2    |
| Q9ULV1 | FZD4    |
| O75084 | FZD7    |
| P27469 | G0S2    |
| P11413 | G6PD    |
| Q13480 | GAB1    |
| Q9UQC2 | GAB2    |
| Q8WWW8 | GAB3    |
| Q06546 | GABPA   |
| Q99259 | GAD1    |
| P24522 | GADD45A |
| Q6ZQY3 | GADL1   |
| P22466 | GAL     |
| Q8N6F7 | GCSAM   |
| Q99999 | GAL3ST1 |
| Q10471 | GALNT2  |
| Q86SF2 | GALNT7  |
| P17677 | GAP43   |
| P04406 | GAPDH   |
| P54826 | GAS1    |
| Q14393 | GAS6    |
| P01350 | GAST    |
| P23769 | GATA2   |
| Q92908 | GATA6   |
| Q8WUU5 | GATAD1  |
| Q8WXI9 | GATAD2B |
| P0DPI2 | GATD3A  |
| P32455 | GBP1    |
| Q8WXF7 | ATL1    |
| Q9H0R5 | GBP3    |
| P48506 | GCLC    |
| P48507 | GCLM    |
| Q9NZC3 | GDE1    |
| Q99988 | GDF15   |
| P39905 | GNDF    |
| Q9H840 | GEMIN7  |
| P14136 | GFAP    |
| O75223 | GGCT    |
| Q9H3C7 | GGNBP2  |
| P01241 | GH1     |
| Q9Y248 | GINS2   |
| O14908 | GIPC1   |
| P17302 | GJA1    |

|        |         |
|--------|---------|
| P29033 | GJB2    |
| O95452 | GJB6    |
| P16278 | GLB1    |
| P23378 | GLDC    |
| P08151 | GLI1    |
| P10070 | GLI2    |
| P10071 | GLI3    |
| P48060 | GLIPR1  |
| Q9H4G4 | GLIPR2  |
| Q04760 | GLO1    |
| P43220 | GLP1R   |
| O94925 | GLS     |
| Q9UI32 | GLS2    |
| P00367 | GLUD1   |
| P49448 | GLUD2   |
| P15104 | GLUL    |
| P30968 | GNRHR   |
| Q08378 | GOLGA3  |
| Q7Z5G4 | GOLGA7  |
| Q8NBJ4 | GOLM1   |
| Q9H4A6 | GOLPH3  |
| Q9HD26 | GOPC    |
| Q9BQQ3 | GORASP1 |
| O95249 | GOSR1   |
| P35052 | GPC1    |
| P78333 | GPC5    |
| P21695 | GPD1    |
| P43304 | GPD2    |
| P06744 | GPI     |
| Q5T848 | GPR158  |
| O60883 | GPR37L1 |
| O15529 | GPR42   |
| Q8IYL9 | GPR65   |
| P07203 | GPX1    |
| P36969 | GPX4    |
| O75791 | GRAP2   |
| O60565 | GREM1   |
| P42261 | GRIA1   |
| Q13224 | GRIN2B  |
| P34947 | GRK5    |
| P43250 | GRK6    |
| Q13255 | GRM1    |
| Q14832 | GRM3    |

|        |         |
|--------|---------|
| O00222 | GRM8    |
| P56915 | GSC     |
| Q9BYG8 | GSDMC   |
| P49841 | GSK3B   |
| P06396 | GSN     |
| Q9Y2Q3 | GSTK1   |
| P09488 | GSTM1   |
| P28161 | GSTM2   |
| P21266 | GSTM3   |
| P78417 | GSTO1   |
| P09211 | GSTP1   |
| P30711 | GSTT1   |
| P32780 | GTF2H1  |
| Q02108 | GUCY1A1 |
| Q02153 | GUCY1B1 |
| Q6FI13 | H2AC18  |
| Q16777 | H2AC20  |
| P16104 | H2AX    |
| P84243 | H3-3A   |
| P68431 | H3C1    |
| P62805 | H4C1    |
| P27695 | APEX1   |
| P54257 | HAP1    |
| Q86UW8 | HAPLN4  |
| Q92819 | HAS2    |
| Q8TDQ0 | HAVCR2  |
| O00165 | HAX1    |
| Q99075 | HBEGF   |
| O60381 | HBP1    |
| Q8IV16 | GPIHBP1 |
| Q9BXC0 | HCAR1   |
| Q9HCI5 | MAGEE1  |
| P14317 | HCLS1   |
| Q13547 | HDAC1   |
| Q92769 | HDAC2   |
| O15379 | HDAC3   |
| P56524 | HDAC4   |
| Q9UQL6 | HDAC5   |
| Q9UBN7 | HDAC6   |
| P51858 | HDGF    |
| Q9H583 | HEATR1  |
| Q7Z4Q2 | HEATR3  |
| Q6AI08 | HEATR6  |

|            |          |
|------------|----------|
| Q9NRZ9     | HELLS    |
| Q9UII4     | HERC5    |
| Q15011     | HERPUD1  |
| A0A0B4J2D5 | GATD3B   |
| Q14469     | HES1     |
| Q5TA89     | HES5     |
| Q96HZ4     | HES6     |
| P06865     | HEXA     |
| P07686     | HEXB     |
| Q30201     | HFE      |
| P14210     | HGF      |
| Q5VTY9     | HHAT     |
| Q96QV1     | HHIP     |
| Q9UM44     | HLA2     |
| Q14526     | HIC1     |
| Q16665     | HIF1A    |
| Q9H2X6     | HIPK2    |
| Q9H422     | HIPK3    |
| P31629     | HIVEP2   |
| P19367     | HK1      |
| P52789     | HK2      |
| P04439     | HLA-A    |
| P01889     | HLA-B    |
| P10321     | HLA-C    |
| P28067     | HLA-DMA  |
| P01909     | HLA-DQA1 |
| P01911     | HLA-DRB1 |
| P13747     | HLA-E    |
| P30511     | HLA-F    |
| P17693     | HLA-G    |
| Q6NT76     | HMBOX1   |
| Q9P0W2     | HMG20B   |
| P17096     | HMGA1    |
| P52926     | HMGA2    |
| P09429     | HMGB1    |
| P26583     | HMGB2    |
| P04035     | HMGCR    |
| P82970     | HMGN5    |
| O75330     | HMMR     |
| P09601     | HMOX1    |
| P41235     | HNF4A    |
| P09651     | HNRNPA1  |
| P07910     | HNRNPC   |

|        |           |
|--------|-----------|
| O14979 | HNRNPDL   |
| P52597 | HNRNPF    |
| P61978 | HNRNPK    |
| Q00839 | HNRNPU    |
| Q96ED9 | HOOK2     |
| P31260 | HOXA10    |
| P31270 | HOXA11    |
| P31271 | HOXA13    |
| O43365 | HOXA3     |
| Q00056 | HOXA4     |
| P20719 | HOXA5     |
| P31268 | HOXA7     |
| P31269 | HOXA9     |
| P14653 | HOXB1     |
| Q92826 | HOXB13    |
| P14651 | HOXB3     |
| P09629 | HOXB7     |
| P17482 | HOXB9     |
| Q9NYD6 | HOXC10    |
| P09017 | HOXC4     |
| P09630 | HOXC6     |
| P31273 | HOXC8     |
| P28358 | HOXD10    |
| P09016 | HOXD4     |
| P28356 | HOXD9     |
| P00738 | HP        |
| O60760 | HPGDS     |
| P00739 | HPR       |
| Q9Y251 | HPSE      |
| P01112 | HRAS      |
| P23327 | HRC       |
| P04196 | HRG       |
| Q6YN16 | HSDL2     |
| Q00613 | HSF1      |
| P07900 | HSP90AA1  |
| Q14568 | HSP90AA2P |
| P14625 | HSP90B1   |
| P0DMV8 | HSPA1A    |
| P0DMV9 | HSPA1B    |
| P34932 | HSPA4     |
| P11021 | HSPA5     |
| P11142 | HSPA8     |
| P04792 | HSPB1     |



|        |         |
|--------|---------|
| Q16082 | HSPB2   |
| Q12988 | HSPB3   |
| P98160 | HSPG2   |
| Q9BUP3 | HTATIP2 |
| P08908 | HTR1A   |
| P28566 | HTR1E   |
| P28335 | HTR2C   |
| P47898 | HTR5A   |
| P50406 | HTR6    |
| Q12794 | HYAL1   |
| Q12891 | HYAL2   |
| O43820 | HYAL3   |
| P05362 | ICAM1   |
| O75144 | ICOSLG  |
| P41134 | ID1     |
| Q02363 | ID2     |
| P47928 | ID4     |
| O75874 | IDH1    |
| P48735 | IDH2    |
| P14902 | IDO1    |
| P46695 | IER3    |
| P40305 | IFI27   |
| P13284 | IFI30   |
| Q01628 | IFITM3  |
| P01562 | IFNA1;  |
| P01574 | IFNB1   |
| P01579 | IFNG    |
| P05019 | IGF1    |
| P08069 | IGF1R   |
| P01344 | IGF2    |
| Q9NZI8 | IGF2BP1 |
| Q9Y6M1 | IGF2BP2 |
| P08833 | IGFBP1  |
| P18065 | IGFBP2  |
| P17936 | IGFBP3  |
| P22692 | IGFBP4  |
| P24592 | IGFBP6  |
| Q16270 | IGFBP7  |
| Q8N6C5 | IGSF1   |
| Q70UQ0 | IKBIP   |
| O14920 | IKBKB   |
| Q14164 | IKBKE   |
| P22301 | IL10    |

|        |         |
|--------|---------|
| P29459 | IL12A   |
| P29460 | IL12B   |
| P35225 | IL13    |
| P78552 | IL13RA1 |
| Q14627 | IL13RA2 |
| P40933 | IL15    |
| Q14005 | IL16    |
| Q16552 | IL17A   |
| Q8TAD2 | IL17D   |
| Q96F46 | IL17RA  |
| Q8NFM7 | IL17RD  |
| Q14116 | IL18    |
| Q13478 | IL18R1  |
| P01583 | IL1A    |
| P01584 | IL1B    |
| P18510 | IL1RN   |
| P60568 | IL2     |
| Q9HBE4 | IL21    |
| Q9GZX6 | IL22    |
| Q969J5 | IL22RA2 |
| Q9NPF7 | IL23A   |
| Q13007 | IL24    |
| Q8NEV9 | IL27    |
| P01589 | IL2RA   |
| P14784 | IL2RB   |
| O95760 | IL33    |
| P05112 | IL4     |
| P24394 | IL4R    |
| P05113 | IL5     |
| P05231 | IL6     |
| P40189 | IL6ST   |
| P13232 | IL7     |
| Q12905 | ILF2    |
| Q13418 | ILK     |
| O00425 | IGF2BP3 |
| Q8TCT8 | SPPL2A  |
| Q9NV31 | IMP3    |
| P29218 | IMPA1   |
| Q16352 | INA     |
| Q9UK53 | ING1    |
| Q9H160 | ING2    |
| Q9UNL4 | ING4    |
| Q8WYH8 | ING5    |

|        |         |
|--------|---------|
| P01308 | INS     |
| P06213 | INSR    |
| Q9ULD6 | INTU    |
| P46940 | IQGAP1  |
| Q5JU85 | IQSEC2  |
| Q9NWZ3 | IRAK4   |
| P10914 | IRF1    |
| Q14653 | IRF3    |
| Q92985 | IRF7    |
| Q00978 | IRF9    |
| A1A4Y4 | IRGM    |
| P35568 | IRS1    |
| P78414 | IRX1    |
| Q96AZ6 | ISG20   |
| Q9NPH2 | ISYNA1  |
| P08514 | ITGA2B  |
| P26006 | ITGA3   |
| P13612 | ITGA4   |
| P08648 | ITGA5   |
| P06756 | ITGAV   |
| P20702 | ITGAX   |
| P05556 | ITGB1   |
| P05106 | ITGB3   |
| P16144 | ITGB4   |
| P18084 | ITGB5   |
| P18564 | ITGB6   |
| P26012 | ITGB8   |
| Q14624 | ITIH4   |
| Q08881 | ITK     |
| P23677 | ITPKA   |
| P28290 | ITPRID2 |
| Q15811 | ITSN1   |
| P78504 | JAG1    |
| P23458 | JAK1    |
| O60674 | JAK2    |
| Q9BX67 | JAM3    |
| Q92833 | JARID2  |
| Q8WYK2 | JDP2    |
| Q6NYC1 | JMJD6   |
| P05412 | JUN     |
| Q63ZY3 | KANK2   |
| Q92830 | KAT2A   |
| Q9H7Z6 | KAT8    |

|        |          |
|--------|----------|
| Q96I82 | KAZALD1  |
| Q16322 | KCNA10   |
| P22001 | KCNA3    |
| P22460 | KCNA5    |
| Q14721 | KCNB1    |
| O95259 | KCNH1    |
| O00180 | KCNK1    |
| Q12791 | KCNMA1   |
| Q16558 | KCNMB1   |
| Q14681 | KCTD2    |
| O60341 | KDM1A    |
| Q8NHM5 | KDM2B    |
| O75164 | KDM4A    |
| P29375 | KDM5A    |
| Q9UGL1 | KDM5B    |
| O15054 | KDM6B    |
| P35968 | KDR      |
| Q14145 | KEAP1    |
| Q07666 | KHDRBS1  |
| P50053 | KHK      |
| Q92945 | KHSRP    |
| Q9HCM3 | KIAA1549 |
| Q15058 | KIF14    |
| O60333 | KIF1B    |
| O95235 | KIF20A   |
| Q02241 | KIF23    |
| Q2KJY2 | KIF26B   |
| O00139 | KIF2A    |
| Q99661 | KIF2C    |
| P33176 | KIF5B    |
| Q8N743 | KIR3DL3  |
| P10721 | KIT      |
| Q07866 | KLC1     |
| Q9Y2Y9 | KLF13    |
| Q9BXX1 | KLF16    |
| Q9Y5W3 | KLF2     |
| O43474 | KLF4     |
| Q13887 | KLF5     |
| Q99612 | KLF6     |
| O75840 | KLF7     |
| O95600 | KLF8     |
| Q13886 | KLF9     |
| P20151 | KLK2     |

|        |         |
|--------|---------|
| Q92876 | KLK6    |
| P26718 | KLRK1   |
| Q03164 | KMT2A   |
| Q9UMN6 | KMT2B   |
| Q8NEZ4 | KMT2C   |
| O14686 | KMT2D   |
| Q9NQR1 | KMT5A   |
| P01042 | KNG1    |
| P52292 | KPNA2   |
| Q14974 | KPNB1   |
| P01116 | KRAS    |
| O00522 | KRIT1   |
| P04264 | KRT1    |
| P32004 | L1CAM   |
| P83111 | LACTB   |
| Q16363 | LAMA4   |
| O15230 | LAMA5   |
| P07942 | LAMB1   |
| P55268 | LAMB2   |
| P11047 | LAMC1   |
| Q13753 | LAMC2   |
| Q9Y2Q5 | LAMTOR2 |
| Q86VI4 | LAPTM4B |
| Q92615 | LARP4B  |
| Q9BRS8 | LARP6   |
| Q14847 | LASP1   |
| O43561 | LAT     |
| O95835 | LATS1   |
| Q9NRM7 | LATS2   |
| P18428 | LBP     |
| P06239 | LCK     |
| P80188 | LCN2    |
| P00338 | LDHA    |
| P01130 | LDLR    |
| P41159 | LEP     |
| O15243 | LEPROT  |
| P48357 | LEPR    |
| Q6P1Q0 | LETMD1  |
| P09382 | LGALS1  |
| Q8TCE9 | LGALS14 |
| P17931 | LGALS3  |
| O00182 | LGALS9  |
| O95970 | LGI1    |

|        |           |
|--------|-----------|
| Q8N145 | LGI3      |
| Q8N135 | LGI4      |
| Q99538 | LGMN      |
| Q9BXB1 | LGR4      |
| O75473 | LGR5      |
| Q86UP9 | LHFPL3    |
| Q9NQ69 | LHX9      |
| P15018 | LIF       |
| P18858 | LIG1      |
| P49917 | LIG4      |
| Q8NHL6 | LILRB1    |
| P55344 | LIM2      |
| P48059 | LIMS1     |
| Q9H9Z2 | LIN28A    |
| Q5TKA1 | LIN9      |
| Q96N35 | LINC00052 |
| P59037 | LINC00313 |
| A8K010 | LINC00473 |
| Q96FQ7 | LINC00526 |
| Q99732 | LITAF     |
| Q15334 | LLGL1     |
| Q96S06 | LMF1      |
| P25791 | LMO2      |
| Q8TBB1 | LNx1      |
| P28300 | LOX       |
| Q9Y4K0 | LOXL2     |
| Q9HBW0 | LPAR2     |
| P06858 | LPL       |
| P02750 | LRG1      |
| Q96JA1 | LRIG1     |
| O94898 | LRIG2     |
| Q6UXM1 | LRIG3     |
| Q07954 | LRP1      |
| O75197 | LRP5      |
| Q6UY01 | LRRC31    |
| Q9HBW1 | LRRC4     |
| Q8IWT6 | LRRC8A    |
| P48449 | LSS       |
| P51884 | LUM       |
| P07948 | LYN       |
| P61626 | LYZ       |
| Q8N653 | LZTR1     |
| Q6ZN28 | MACC1     |

|        |          |
|--------|----------|
| Q9Y6D9 | MAD1L1   |
| Q13257 | MAD2L1   |
| Q9UI95 | MAD2L2   |
| P20916 | MAG      |
| P43356 | MAGEA2   |
| P43360 | MAGEA6   |
| Q9Y5V3 | MAGED1   |
| Q96JG8 | MAGED4   |
| Q5TCQ9 | MAGI3    |
| Q9H0U3 | MAGT1    |
| Q9BXY0 | MAK16    |
| Q9UDY8 | MALT1    |
| Q8IZL2 | MAML2    |
| P21397 | MAOA     |
| P27338 | MAOB     |
| P46821 | MAP1B    |
| Q9GZQ8 | MAP1LC3B |
| P11137 | MAP2     |
| Q02750 | MAP2K1   |
| P36507 | MAP2K2   |
| P46734 | MAP2K3   |
| P45985 | MAP2K4   |
| O14733 | MAP2K7   |
| Q13233 | MAP3K1   |
| Q99558 | MAP3K14  |
| Q5TCX8 | MAP3K21  |
| P28482 | MAPK1    |
| Q16539 | MAPK14   |
| P27361 | MAPK3    |
| Q13164 | MAPK7    |
| P45983 | MAPK8    |
| Q9UQF2 | MAPK8IP1 |
| Q9BPZ7 | MAPKAP1  |
| Q5T0T0 | MARCHF8  |
| P29966 | MARCKS   |
| P49006 | MARCKSL1 |
| Q96L34 | MARK4    |
| P04201 | MAS1     |
| Q9UIS9 | MBD1     |
| Q9UBB5 | MBD2     |
| P11226 | MBL2     |
| P02686 | MBP      |
| Q14703 | MBTPS1   |

|        |        |
|--------|--------|
| P43121 | MCAM   |
| Q07820 | MCL1   |
| P49736 | MCM2   |
| P25205 | MCM3   |
| Q14566 | MCM6   |
| P33993 | MCM7   |
| Q8IZK6 | MCOLN2 |
| Q8NEM0 | MCPH1  |
| Q96EZ8 | MCRS1  |
| Q9NWR8 | MCUB   |
| Q14676 | MDC1   |
| P21741 | MDK    |
| Q00987 | MDM2   |
| O15151 | MDM4   |
| P48163 | ME1    |
| Q03112 | MECOM  |
| P51608 | MECP2  |
| O95243 | MBD4   |
| Q15648 | MED1   |
| Q71SY5 | MED25  |
| Q9NWA0 | MED9   |
| Q06413 | MEF2C  |
| Q14814 | MEF2D  |
| O15553 | MEFV   |
| Q96KG7 | MEGF10 |
| Q14680 | MELK   |
| P08582 | MELTF  |
| O00255 | MEN1   |
| P50222 | MEOX2  |
| Q12866 | MERTK  |
| P08581 | MET    |
| Q9NWH9 | SLTM   |
| P50579 | METAP2 |
| Q86U44 | METTL3 |
| P55081 | MFAP1  |
| P26572 | MGAT1  |
| Q09328 | MGAT5  |
| P16455 | MGMT   |
| P08493 | MGP    |
| Q16674 | MIA    |
| Q86YT6 | MIB1   |
| Q96AX9 | MIB2   |
| Q29983 | MICA   |



|        |          |
|--------|----------|
| Q5JXC2 | MIIP     |
| Q4G0A6 | MINDY4   |
| Q75NE6 | MIR17HG  |
| O75030 | MITF     |
| P46013 | MKI67    |
| Q9BUB5 | MKNK1    |
| Q9NXB0 | MKS1     |
| P40692 | MLH1     |
| Q9UHC1 | MLH3     |
| Q8NB16 | MLKL     |
| P55197 | MLLT10   |
| P08473 | MME      |
| P03956 | MMP1     |
| P39900 | MMP12    |
| P45452 | MMP13    |
| P50281 | MMP14    |
| P51511 | MMP15    |
| P51512 | MMP16    |
| P08253 | MMP2     |
| Q9NRE1 | MMP26    |
| P08254 | MMP3     |
| P09237 | MMP7     |
| P14780 | MMP9     |
| Q13201 | MMRN1    |
| P22033 | MMUT     |
| Q9UQ07 | MOK      |
| Q9HCE1 | MOV10    |
| Q9Y5U8 | MPC1     |
| O95563 | MPC2     |
| P29372 | MPG      |
| Q99547 | MPHOSPH6 |
| P34949 | MPI      |
| Q6WCQ1 | MPRIP    |
| P25189 | MPZ      |
| P22897 | MRC1     |
| Q9UBG0 | MRC2     |
| P49959 | MRE11    |
| Q13084 | MRPL28   |
| Q8TCC3 | MRPL30   |
| Q9Y6G3 | MRPL42   |
| O60682 | MSC      |
| P43246 | MSH2     |
| P20585 | MSH3     |

|        |        |
|--------|--------|
| P52701 | MSH6   |
| O43347 | MSI1   |
| P26038 | MSN    |
| P21757 | MSR1   |
| P26927 | MST1   |
| P04731 | MT1A   |
| P07438 | MT1B   |
| P04732 | MT1E   |
| P04733 | MT1F   |
| P80294 | MT1H   |
| Q93083 | MT1L   |
| P13640 | MT1G   |
| Q8N339 | MT1M   |
| P80297 | MT1X   |
| O94776 | MTA2   |
| Q9BTC8 | MTA3   |
| Q13126 | MTAP   |
| Q86UE4 | MTDH   |
| P13995 | MTHFD2 |
| P42898 | MTHFR  |
| Q13615 | MTMR3  |
| P48039 | MTNR1A |
| P42345 | MTOR   |
| Q9UBK8 | MTRR   |
| P15941 | MUC1   |
| Q9UIF7 | MUTYH  |
| P53602 | MVD    |
| Q14764 | MVP    |
| P20591 | MX1    |
| Q05195 | MXD1   |
| P50539 | MXI1   |
| P10242 | MYB    |
| P10243 | MYBL1  |
| P10244 | MYBL2  |
| Q13203 | MYBPH  |
| P01106 | MYC    |
| Q99417 | MYCBP  |
| P04198 | MYCN   |
| P35580 | MYH10  |
| Q9UKX2 | MYH2   |
| P10916 | MYL2   |
| Q15746 | MYLK   |
| Q96A32 | MYLPF  |

|        |         |
|--------|---------|
| O43795 | MYO1B   |
| Q9UL68 | MYT1L   |
| Q14CX7 | NAA25   |
| Q96HR8 | NAF1    |
| P43490 | NAMPT   |
| Q9H9S0 | NANOG   |
| Q9NR45 | NANS    |
| P55209 | NAP1L1  |
| Q6XQN6 | NAPRT   |
| P11245 | NAT2    |
| Q6N069 | NAA16   |
| Q6ZS30 | NBEAL1  |
| O60934 | NBN     |
| P19878 | NCF2    |
| P19338 | NCL     |
| Q15788 | NCOA1   |
| O76036 | NCR1    |
| Q68D85 | NCR3LG1 |
| O14777 | NDC80   |
| Q9GZM8 | NDEL1   |
| Q92597 | NDRG1   |
| Q9UN36 | NDRG2   |
| Q9ULP0 | NDRG4   |
| Q9P0J0 | NDUFA13 |
| P46934 | NEDD4   |
| Q96PU5 | NEDD4L  |
| Q14511 | NEDD9   |
| P07196 | NEFL    |
| P51955 | NEK2    |
| P18615 | NELFE   |
| Q92859 | NEO1    |
| P48681 | NES     |
| P21359 | NF1     |
| P35240 | NF2     |
| O94916 | NFAT5   |
| O95644 | NFATC1  |
| Q13469 | NFATC2  |
| Q12968 | NFATC3  |
| Q14934 | NFATC4  |
| Q16236 | NFE2L2  |
| O00712 | NFIB    |
| Q16649 | NFIL3   |
| Q14938 | NFIX    |

|        |        |
|--------|--------|
| P19838 | NFKB1  |
| P25963 | NFKBIA |
| Q9NPG2 | NGB    |
| P01138 | NGF    |
| P08138 | NGFR   |
| Q6T4R5 | NHS    |
| Q96TA1 | NIBAN2 |
| Q9NZG7 | NINJ2  |
| Q8N5F7 | NKAP   |
| P43699 | NKX2-1 |
| Q9NZ94 | NLGN3  |
| Q9UBE8 | NLK    |
| Q9NPP4 | NLRC4  |
| P59046 | NLRP12 |
| Q9NX02 | NLRP2  |
| Q96P20 | NLRP3  |
| P15531 | NME1   |
| Q13287 | NMI    |
| Q9ULX3 | NOB1   |
| Q9Y3T9 | NOC2L  |
| Q9HC29 | NOD2   |
| Q13253 | NOG    |
| Q15155 | NOMO1  |
| P46087 | NOP2   |
| Q9NZM5 | NOP53  |
| P29475 | NOS1   |
| Q8WY41 | NANOS1 |
| O75052 | NOS1AP |
| P35228 | NOS2   |
| P60321 | NANOS2 |
| P46531 | NOTCH1 |
| Q04721 | NOTCH2 |
| Q9UM47 | NOTCH3 |
| P51513 | NOVA1  |
| Q9UNW9 | NOVA2  |
| Q9Y5S8 | NOX1   |
| Q9NPH5 | NOX4   |
| P06748 | NPM1   |
| P23582 | NPPC   |
| Q8WTW4 | NPRL2  |
| P01303 | NPY    |
| P15559 | NQO1   |
| O75469 | NR1I2  |

|        |        |
|--------|--------|
| P49116 | NR2C2  |
| Q9Y466 | NR2E1  |
| P24468 | NR2F2  |
| P04150 | NR3C1  |
| P01111 | NRAS   |
| Q16612 | NREP   |
| Q02297 | NRG1   |
| O14786 | NRP1   |
| Q92832 | NELL1  |
| O60462 | NRP2   |
| Q9HDB5 | NRXN3  |
| Q9Y4C0 | NRXN3  |
| Q96L73 | NSD1   |
| Q96P11 | NSUN5  |
| Q9H0P0 | NT5C3A |
| Q9H857 | NT5DC2 |
| P21589 | NT5E   |
| P20783 | NTF3   |
| O95631 | NTN1   |
| P04629 | NTRK1  |
| Q16620 | NTRK2  |
| Q16288 | NTRK3  |
| P30990 | NTS    |
| P30989 | NTSR1  |
| P78423 | CX3CL1 |
| Q9H093 | NUAK2  |
| Q9BZD4 | NUF2   |
| Q9Y6R0 | NUMBL  |
| P37198 | NUP62  |
| P52948 | NUP98  |
| Q9BXS6 | NUSAP1 |
| Q9UKK6 | NXT1   |
| Q16625 | OCLN   |
| P11926 | ODC1   |
| O43482 | OIP5   |
| Q13516 | OLIG2  |
| O60313 | OPA1   |
| Q14982 | OPCML  |
| P41143 | OPRD1  |
| P41145 | OPRK1  |
| Q96CV9 | OPTN   |
| Q9H205 | OR2AG1 |
| Q96D31 | ORAI1  |

|        |          |
|--------|----------|
| Q96SN7 | ORAI2    |
| Q8N138 | ORMDL3   |
| P13725 | OSM      |
| Q99650 | OSMR     |
| P55809 | OXCT1    |
| Q99571 | P2RX4    |
| Q99572 | P2RX7    |
| P47900 | P2RY1    |
| Q9H244 | P2RY12   |
| Q15391 | P2RY14   |
| P13674 | P4HA1    |
| P07237 | P4HB     |
| P09466 | PAEP     |
| P00439 | PAH      |
| Q13153 | PAK1     |
| O96013 | PAK4     |
| Q9NQU5 | PAK6     |
| Q9P286 | PAK5     |
| O75592 | MYCBP2   |
| P19021 | PAM      |
| Q96RD6 | PANX2    |
| Q6TCH7 | PAQR3    |
| Q86WK9 | PAQR7    |
| Q99497 | PARK7    |
| P09874 | PARP1    |
| Q8IV76 | PASD1    |
| Q9HBE1 | PATZ1    |
| Q96IZ0 | PAWR     |
| P23760 | PAX3     |
| P26367 | PAX6     |
| Q9BUH6 | PAXX     |
| Q96KB5 | PBK      |
| Q9GZY1 | PBOV1    |
| P40426 | PBX3     |
| P61457 | PCBD1    |
| Q9H0N5 | PCBD2    |
| Q15366 | PCBP2    |
| Q9P2E7 | PCDH10   |
| O95206 | PCDH8    |
| Q9HC56 | PCDH9    |
| Q9Y5H2 | PCDHGA11 |
| Q96HM7 | PCED1B   |
| Q9BSM1 | PCGF1    |

|        |          |
|--------|----------|
| Q15004 | PCLAF    |
| P22061 | PCMT1    |
| P12004 | PCNA     |
| P29120 | PCSK1    |
| P29122 | PCSK6    |
| Q13442 | PDAP1    |
| Q15116 | PDCD1    |
| Q9BQ51 | PDCD1LG2 |
| Q53EL6 | PDCD4    |
| O14737 | PDCD5    |
| Q08493 | PDE4C    |
| O76074 | PDE5A    |
| P04085 | PDGFA    |
| P01127 | PDGFB    |
| P16234 | PDGFRA   |
| P09619 | PDGFRB   |
| P30101 | PDIA3    |
| Q8N165 | PDIK1L   |
| Q15118 | PDK1     |
| Q15120 | PDK3     |
| Q16654 | PDK4     |
| O00151 | PDLIM1   |
| Q96HC4 | PDLIM5   |
| Q86YL7 | PDPN     |
| Q6P996 | PDXDC1   |
| Q96GD0 | PDXP     |
| Q15121 | PEA15    |
| P30086 | PEBP1    |
| Q96S96 | PEBP4    |
| P16284 | PECAM1   |
| Q86TG7 | PEG10    |
| Q9GZU2 | PEG3     |
| O15534 | PER1     |
| O15055 | PER2     |
| P56645 | PER3     |
| P02776 | PF4      |
| Q16877 | PFKFB4   |
| P07737 | PFN1     |
| P18669 | PGAM1    |
| P00558 | PGK1     |
| Q9NXJ5 | PGPEP1   |
| O00264 | PGRMC1   |
| P35232 | PHB      |

|        |         |
|--------|---------|
| P78364 | PHC1    |
| P78562 | PHEX    |
| O94880 | PHF14   |
| Q5T6S3 | PHF19   |
| Q9BVI0 | PHF20   |
| Q96BD5 | PHF21A  |
| O43175 | PHGDH   |
| Q8WV24 | PHLDA1  |
| Q86UU1 | PHLDB1  |
| O60346 | PHLPP1  |
| Q6ZVD8 | PHLPP2  |
| Q96FC7 | PHYHIPL |
| Q9Y6X2 | PIAS3   |
| Q7Z2X4 | PID1    |
| Q92508 | PIEZO1  |
| Q9H5I5 | PIEZO2  |
| O00750 | PIK3C2B |
| P42336 | PIK3CA  |
| P42338 | PIK3CB  |
| O00329 | PIK3CD  |
| P48736 | PIK3CG  |
| P27986 | PIK3R1  |
| Q92569 | PIK3R3  |
| Q13526 | PIN1    |
| Q96BK5 | PINX1   |
| P78337 | PITX1   |
| Q96J94 | PIWIL1  |
| Q8TC59 | PIWIL2  |
| Q7Z3Z4 | PIWIL4  |
| P98161 | PKD1    |
| Q13563 | PKD2    |
| Q9P0L9 | PKD2L1  |
| P14618 | PKM     |
| Q99959 | PKP2    |
| Q9UP65 | PLA2G4C |
| P39877 | PLA2G5  |
| Q9UL19 | PLAAT4  |
| P00750 | PLAT    |
| P00749 | PLAU    |
| Q03405 | PLAUR   |
| Q9NQ66 | PLCB1   |
| P19174 | PLCG1   |
| Q15111 | PLCL1   |



|        |           |
|--------|-----------|
| Q13393 | PLD1      |
| O14939 | PLD2      |
| P08567 | PLEK      |
| Q96JA3 | PLEKHA8   |
| O95397 | PLEKHA8P1 |
| O94827 | PLEKHG5   |
| Q53GL0 | PLEKHO1   |
| P00747 | PLG       |
| P53350 | PLK1      |
| O00444 | PLK4      |
| O00469 | PLOD2     |
| O60568 | PLOD3     |
| P60201 | PLP1      |
| Q04941 | PLP2      |
| P55058 | PLTP      |
| Q9ULL4 | PLXNB3    |
| Q969W9 | PMEPA1    |
| Q01453 | PMP22     |
| Q9NR77 | PXMP2     |
| P54277 | PMS1      |
| P54278 | PMS2      |
| P16233 | PNLIP     |
| Q9NRX1 | PNO1      |
| Q96AD5 | PNPLA2    |
| P06746 | POLB      |
| P28340 | POLD1     |
| Q15054 | POLD3     |
| Q9HCU8 | POLD4     |
| Q9Y2S7 | POLDIP2   |
| Q9NR33 | POLE4     |
| Q9UBT6 | POLK      |
| Q9UGP5 | POLL      |
| Q9NP87 | POLM      |
| P24928 | POLR2A    |
| Q9NW08 | POLR3B    |
| P01189 | POMC      |
| P27169 | PON1      |
| P16435 | POR       |
| Q15063 | POSTN     |
| Q9NUX5 | POT1      |
| Q6S545 | POTEH     |
| Q9BYX7 | POTEKP    |
| A6NI47 | POTEM     |

|        |          |
|--------|----------|
| P20264 | POU3F3   |
| Q01860 | POU5F1   |
| Q07869 | PPARA    |
| P37231 | PPARG    |
| P62937 | PPIA     |
| P30405 | PPIF     |
| Q9Y3C6 | PPIL1    |
| Q9H2H8 | PPIL3    |
| O15297 | PPM1D    |
| Q8WUF5 | PPP1R13L |
| O14990 | PPP1R2C  |
| Q96SB3 | PPP1R9B  |
| P53041 | PPP5C    |
| D3DTV9 | PRAC2    |
| Q96NZ9 | PRAP1    |
| O43663 | PRC1     |
| O75626 | PRDM1    |
| Q9H4Q3 | PRDM13   |
| Q13029 | PRDM2    |
| Q06830 | PRDX1    |
| P32119 | PRDX2    |
| P30044 | PRDX5    |
| P48147 | PREP     |
| Q5JRX3 | PITRM1   |
| Q13131 | PRKAA1   |
| P54646 | PRKAA2   |
| Q9Y478 | PRKAB1   |
| P22612 | PRKACG   |
| P05771 | PRKCB    |
| Q05655 | PRKCD    |
| Q02156 | PRKCE    |
| P41743 | PRKCI    |
| Q9BZL6 | PRKD2    |
| P78527 | PRKDC    |
| Q13237 | PRKG2    |
| O60260 | PRKN     |
| P01236 | PRL      |
| P40424 | PBX1     |
| Q99873 | PRMT1    |
| O14744 | PRMT5    |
| F7VJQ1 | PRNP     |
| P04156 | PRNP     |
| Q9HC23 | PROK2    |

|        |        |
|--------|--------|
| O43490 | PROM1  |
| O75360 | PROP1  |
| Q92786 | PROX1  |
| Q8WWY3 | PRPF31 |
| Q96HE9 | PRR11  |
| Q7Z6L0 | PRRT2  |
| Q9GZN4 | PRSS22 |
| Q6UWB4 | PRSS55 |
| Q16651 | PRSS8  |
| P07602 | PSAP   |
| Q8IWL1 | SFTPA2 |
| Q8IWL2 | SFTPA1 |
| Q9NZJ7 | MTCH1  |
| O43653 | PSCA   |
| A5PKW4 | PSD    |
| Q9NYI0 | PSD3   |
| Q8NDX1 | PSD4   |
| P49768 | PSEN1  |
| P49810 | PSEN2  |
| O75475 | PSIP1  |
| P28070 | PSMB4  |
| P28062 | PSMB8  |
| O75832 | PSMD10 |
| O00233 | PSMD9  |
| O95456 | PSMG1  |
| P26599 | PTBP1  |
| Q9UKA9 | PTBP2  |
| Q13635 | PTCH1  |
| Q7RTS3 | PTF1A  |
| O14684 | PTGES  |
| P23219 | PTGS1  |
| P35354 | PTGS2  |
| P01270 | PTH    |
| P12272 | PTHLH  |
| Q05397 | PTK2   |
| Q14289 | PTK2B  |
| P21246 | PTN    |
| O75365 | PTP4A3 |
| Q15257 | PTPA   |
| P18031 | PTPN1  |
| Q06124 | PTPN11 |
| P17706 | PTPN2  |
| P26045 | PTPN3  |

|        |          |
|--------|----------|
| P43378 | PTPN9    |
| P18433 | PTPRA    |
| P08575 | PTPRC    |
| P10586 | PTPRF    |
| Q12913 | PTPRJ    |
| O14522 | PTPRT    |
| Q92729 | PTPRU    |
| P23471 | PTPRZ1   |
| O95997 | PTTG1    |
| P53801 | PTTG1IP  |
| O75364 | PITX3    |
| P26022 | PTX3     |
| P15151 | PVR      |
| P49023 | PXN      |
| Q9BRQ0 | PYGO2    |
| Q96PU8 | QKI      |
| Q16769 | QPCT     |
| P61026 | RAB10    |
| Q9NP72 | RAB18    |
| P62820 | RAB1A    |
| Q9UL25 | RAB21    |
| Q9ULC3 | RAB23    |
| P51159 | RAB27A   |
| O00194 | RAB27B   |
| P61019 | RAB2A    |
| P0DI83 | RAB34    |
| Q9BZG1 | RAB34    |
| P57729 | RAB38    |
| P20336 | RAB3A    |
| P20337 | RAB3B    |
| Q8N4Z0 | RAB42    |
| Q86YS6 | RAB43    |
| P20339 | RAB5A    |
| P20340 | RAB6A    |
| P61006 | RAB8A    |
| P63000 | RAC1     |
| P15153 | RAC2     |
| P60763 | RAC3     |
| P63244 | RACK1    |
| Q9NS91 | RAD18    |
| Q92878 | RAD50    |
| Q06609 | RAD51    |
| Q96B01 | RAD51AP1 |

|        |         |
|--------|---------|
| O15315 | RAD51B  |
| P43351 | RAD52   |
| P46100 | ATRX    |
| Q92698 | RAD54L  |
| P04049 | RAF1    |
| Q15311 | RALBP1  |
| P49792 | RANBP2  |
| O60518 | RANBP6  |
| P46060 | RANGAP1 |
| P61224 | RAP1B   |
| P10114 | RAP2A   |
| P61225 | RAP2B   |
| Q8WZA2 | RAPGEF4 |
| P10826 | RARB    |
| P20936 | RASA1   |
| Q9Y272 | RASD1   |
| Q13972 | RASGRF1 |
| Q8IV61 | RASGRP3 |
| Q9NS23 | RASSF1  |
| A6NK89 | RASSF10 |
| Q9H2L5 | RASSF4  |
| Q8WWW0 | RASSF5  |
| Q9HCJ3 | RAVER2  |
| P06400 | RB1     |
| Q15291 | RBBP5   |
| Q7Z6E9 | RBBP6   |
| Q08999 | RBL2    |
| Q96PK6 | RBM14   |
| Q96I25 | RBM17   |
| Q8IUH3 | RBM45   |
| Q6XE24 | RBMS3   |
| O95153 | TSPOAP1 |
| P09455 | RBP1    |
| Q06330 | RBPJ    |
| Q8IZV5 | RDH10   |
| P35241 | RDX     |
| O95980 | RECK    |
| O94761 | RECQL4  |
| P05451 | REG1A   |
| Q9BYZ8 | REG4    |
| Q04206 | RELA    |
| Q01201 | RELB    |
| P00797 | REN     |

|        |           |
|--------|-----------|
| Q9BWE0 | REPIN1    |
| Q13127 | REST      |
| O60673 | REV3L     |
| Q8N1G1 | REXO1     |
| P22670 | RFX1      |
| Q9H4X1 | RGCC      |
| P49796 | RGS3      |
| P49798 | RGS4      |
| Q96CC6 | RHBDF1    |
| P61586 | RHOA      |
| Q9BWJ2 | RHPN1-AS1 |
| Q8IUC4 | RHPN2     |
| Q6R327 | RICTOR    |
| Q8WYP3 | RIN2      |
| O14730 | RIOK3     |
| Q9H6W3 | RIOX1     |
| Q13546 | RIPK1     |
| O43353 | RIPK2     |
| Q9Y572 | RIPK3     |
| Q96DM3 | RMC1      |
| Q96DB5 | RMDN1     |
| Q96LZ7 | RMDN2     |
| Q96TC7 | RMDN3     |
| P12724 | RNASE3    |
| O75792 | RNASEH2A  |
| Q5TBB1 | RNASEH2B  |
| P61587 | RND3      |
| Q9ULX5 | RNF112    |
| Q8WVD3 | RNF138    |
| Q9NV58 | RNF19A    |
| Q9H4P4 | RNF41     |
| Q99942 | RNF5      |
| Q9Y6N7 | ROBO1     |
| Q8WZ75 | ROBO4     |
| Q13464 | ROCK1     |
| O75116 | ROCK2     |
| P35398 | RORA      |
| Q92753 | RORB      |
| P08922 | ROS1      |
| P35244 | RPA3      |
| Q86UA6 | RPAIN     |
| P62913 | RPL11     |
| P49207 | RPL34     |

|        |         |
|--------|---------|
| Q9Y3U8 | RPL36   |
| O95059 | RPP14   |
| P62841 | RPS15   |
| P62753 | RPS6    |
| Q15418 | RPS6KA1 |
| P51812 | RPS6KA3 |
| P23443 | RPS6KB1 |
| P08865 | RPSA    |
| Q8N122 | RPTOR   |
| P23921 | RRM1    |
| P31350 | RRM2    |
| Q2MKA7 | RSPO1   |
| Q15404 | RSU1    |
| Q9NZ71 | RTEL1   |
| Q9NQC3 | RTN4    |
| Q9BZR6 | RTN4R   |
| Q01196 | RUNX1   |
| Q13950 | RUNX2   |
| Q13761 | RUNX3   |
| Q9Y3V2 | RWDD3   |
| P34925 | RYK     |
| Q15413 | RYR3    |
| P23297 | S100A1  |
| P31949 | S100A11 |
| Q99584 | S100A13 |
| Q96FQ6 | S100A16 |
| P26447 | S100A4  |
| P06702 | S100A9  |
| P04271 | S100B   |
| O95136 | S1PR2   |
| P35542 | SAA4    |
| Q9UBE0 | SAE1    |
| Q9NXZ1 | SAGE1   |
| Q9UJQ4 | SALL4   |
| Q5K651 | SAMD9   |
| Q9NSI8 | SAMSN1  |
| Q9UHR5 | SAP30BP |
| O94885 | SASH1   |
| Q01826 | SATB1   |
| Q8N9R8 | SCAI    |
| O00767 | SCD     |
| Q9UQD0 | SCN8A   |
| P51172 | SCNN1D  |

|        |          |
|--------|----------|
| O43819 | SCO2     |
| Q9NQ36 | SCUBE2   |
| Q96KG9 | SCYL1    |
| P18827 | SDC1     |
| P34741 | SDC2     |
| O00560 | SDCBP    |
| Q9NX18 | SDHAF2   |
| Q99643 | SDHC     |
| O14521 | SDHD     |
| O94855 | SEC24D   |
| Q9UBV2 | SEL1L    |
| Q14563 | SEMA3A   |
| Q13214 | SEMA3B   |
| Q99985 | SEMA3C   |
| Q9NS98 | SEMA3G   |
| Q9NPR2 | SEMA4B   |
| Q13591 | SEMA5A   |
| Q9H2E6 | SEMA6A   |
| O75326 | SEMA7A   |
| Q15019 | SEPTIN2  |
| Q16181 | SEPTIN7  |
| Q8NC51 | SERBP1   |
| P01011 | SERPINA3 |
| P30740 | SERPINB1 |
| P05120 | SERPINB2 |
| P05121 | SERPINE1 |
| P36955 | SERPINF1 |
| P05155 | SERPING1 |
| P50454 | SERPINH1 |
| P58004 | SESN2    |
| Q9BYW2 | SETD2    |
| Q9Y3B4 | SF3B6    |
| Q8N474 | SFRP1    |
| Q96HF1 | SFRP2    |
| Q6FHJ7 | SFRP4    |
| O00141 | SGK1     |
| Q86VZ5 | SGMS1    |
| Q8NHU3 | SGMS2    |
| Q96HU1 | SGSM3    |
| Q99961 | SH3GL1   |
| Q99962 | SH3GL2   |
| Q99963 | SH3GL3   |
| Q9Y371 | SH3GLB1  |



|        |          |
|--------|----------|
| Q5TCZ1 | SH3PXD2A |
| Q9UPX8 | SHANK2   |
| P04278 | SHBG     |
| Q92529 | SHC3     |
| Q8NEM2 | SHCBP1   |
| Q15465 | SHH      |
| P34897 | SHMT2    |
| O60902 | SHOX2    |
| Q149N8 | SHPRH    |
| Q8IUQ4 | SIAH1    |
| Q9Y286 | SIGLEC7  |
| Q9H173 | SIL1     |
| Q14190 | SIM2     |
| Q96EB6 | SIRT1    |
| Q8IXJ6 | SIRT2    |
| Q9NTG7 | SIRT3    |
| Q8N6T7 | SIRT6    |
| Q9NRC8 | SIRT7    |
| Q15475 | SIX1     |
| O95343 | SIX3     |
| Q96BD8 | SKA1     |
| Q8WVK7 | SKA2     |
| P12755 | SKI      |
| Q13309 | SKP2     |
| Q13291 | SLAMF1   |
| Q9P0V8 | SLAMF8   |
| P55011 | SLC12A2  |
| Q9BXP2 | SLC12A9  |
| O15427 | SLC16A3  |
| O15374 | SLC16A4  |
| O60669 | SLC16A7  |
| O95907 | SLC16A8  |
| Q9P2U7 | SLC17A7  |
| P43004 | SLC1A2   |
| P43003 | SLC1A3   |
| Q8WUG5 | SLC22A17 |
| Q96BI1 | SLC22A18 |
| O75751 | SLC22A3  |
| Q6NUK1 | SLC25A24 |
| Q00325 | SLC25A3  |
| P40879 | SLC26A3  |
| O14975 | SLC27A2  |
| Q5K4L6 | SLC27A3  |

|        |          |
|--------|----------|
| Q99808 | SLC29A1  |
| P11166 | SLC2A1   |
| P11169 | SLC2A3   |
| Q9NR83 | SLC2A4RG |
| P22732 | SLC2A5   |
| Q6PML9 | SLC30A9  |
| O95436 | SLC34A2  |
| P78382 | SLC35A1  |
| Q9Y2D2 | SLC35A3  |
| O43826 | SLC37A4  |
| Q99624 | SLC38A3  |
| Q8N1S5 | SLC39A11 |
| Q6P5W5 | SLC39A4  |
| Q8WWI5 | SLC44A1  |
| Q96NT5 | SLC46A1  |
| Q9BRV3 | SLC50A1  |
| Q9HAB3 | SLC52A2  |
| Q9NQ40 | SLC52A3  |
| Q92911 | SLC5A5   |
| Q8N695 | SLC5A8   |
| Q01959 | SLC6A3   |
| Q9UPY5 | SLC7A11  |
| Q01650 | SLC7A5   |
| Q9UM01 | SLC7A7   |
| Q9UPR5 | SLC8A2   |
| P19634 | SLC9A1   |
| O14745 | SLC9A3R1 |
| Q14940 | SLC9A5   |
| Q8IVB4 | SLC9A9   |
| Q86UG4 | SLCO6A1  |
| Q08AF3 | SLFN5    |
| Q6IEE8 | SLFN12L  |
| O75093 | SLIT1    |
| O94813 | SLIT2    |
| Q9H2G2 | SLK      |
| Q15797 | SMAD1    |
| Q15796 | SMAD2    |
| P84022 | SMAD3    |
| Q13485 | SMAD4    |
| O43541 | SMAD6    |
| O15105 | SMAD7    |
| P28370 | SMARCA1  |
| P51531 | SMARCA2  |

|            |         |
|------------|---------|
| P51532     | SMARCA4 |
| O60264     | SMARCA5 |
| Q12824     | SMARCB1 |
| Q14683     | SMC1A   |
| O95347     | SMC2    |
| Q9NTJ3     | SMC4    |
| Q16637     | SMN1    |
| Q9H4F8     | SMOC1   |
| P17405     | SMPD1   |
| Q53HV7     | SMUG1   |
| Q9HCE7     | SMURF1  |
| Q9H7B4     | SMYD3   |
| O95863     | SNAI1   |
| O43623     | SNAI2   |
| O60641     | SNAP91  |
| P37840     | SNCA    |
| Q7KZF4     | SND1    |
| Q9BXW3     | SNHG12  |
| P08621     | SNRNP70 |
| P35610     | SOAT1   |
| O14543     | SOCS3   |
| P00441     | SOD1    |
| P04179     | SOD2    |
| P08294     | SOD3    |
| Q99523     | SORT1   |
| Q07889     | SOS1    |
| O00570     | SOX1    |
| P56693     | SOX10   |
| Q9UN79     | SOX13   |
| P48431     | SOX2    |
| Q9Y651     | SOX21   |
| Q06945     | SOX4    |
| P35711     | SOX5    |
| P35712     | SOX6    |
| Q9BT81     | SOX7    |
| P48436     | SOX9    |
| P08047     | SP1     |
| Q8N907     | DAND5   |
| Q02447     | SP3     |
| A0A1B0GVQ0 | SPAAR   |
| P09486     | SPARC   |
| Q14515     | SPARCL1 |
| Q5MJ70     | SPDYA   |

|        |            |
|--------|------------|
| Q9NYA1 | SPHK1      |
| Q9NRA0 | SPHK2      |
| Q2M3C7 | SPHKAP     |
| P17947 | SPI1       |
| O43291 | SPINT2     |
| Q6ZMY3 | SPOCD1     |
| Q08629 | SPOCK1     |
| Q92563 | SPOCK2     |
| O43791 | SPOP       |
| P10451 | SPP1       |
| Q9BX95 | SGPP1      |
| O43609 | SPRY1      |
| O43597 | SPRY2      |
| Q9C004 | SPRY4      |
| O15269 | SPTLC1     |
| Q9BXG8 | SPZ1       |
| Q13501 | SQSTM1     |
| P12931 | SRC        |
| P18405 | SRD5A1     |
| Q12772 | SREBF2     |
| P10124 | SRGN       |
| P30626 | SRI        |
| Q96SB4 | SRPK1      |
| Q9Y5M8 | SRPRB      |
| Q9UQ35 | SRRM2      |
| Q07955 | SRSF1      |
| P84103 | SRSF3      |
| Q08945 | SSRP1      |
| P61278 | SST        |
| P30874 | SSTR2      |
| P31391 | SSTR4      |
| P50502 | ST13       |
| Q9Y5Y6 | ST14       |
| P15907 | ST6GAL1    |
| Q9BVH7 | ST6GALNAC5 |
| Q92185 | ST8SIA1    |
| Q8N3U4 | STAG2      |
| P25092 | GUCY2C     |
| P49675 | STAR       |
| Q9Y3M8 | STARD13    |
| P42224 | STAT1      |
| P52630 | STAT2      |
| P40763 | STAT3      |

|        |         |
|--------|---------|
| P42229 | STAT5A  |
| P51692 | STAT5B  |
| P42226 | STAT6   |
| P52823 | STC1    |
| Q658P3 | STEAP3  |
| Q13586 | STIM1   |
| P31948 | STIP1   |
| Q15831 | STK11   |
| Q9UEE5 | STK17A  |
| O00506 | STK25   |
| Q9Y2H1 | STK38L  |
| Q13043 | STK4    |
| P16949 | STMN1   |
| Q9NZ72 | STMN3   |
| Q9H668 | STN1    |
| Q9Y6Q2 | STON1   |
| Q9UJZ1 | STOML2  |
| Q8N801 | STPG4   |
| Q6J9G0 | STYK1   |
| Q9Y6J8 | STYXL1  |
| P53999 | SUB1    |
| P53597 | SUCLG1  |
| Q8IWU5 | SULF2   |
| P50225 | SULT1A1 |
| Q06520 | SULT2A1 |
| P63165 | SUMO1   |
| O43463 | SUV39H1 |
| Q9H5I1 | SUV39H2 |
| Q15022 | SUZ12   |
| Q7L0J3 | SV2A    |
| Q8NHG7 | SVIP    |
| Q9NX95 | SYBU    |
| O95926 | SYF2    |
| O15061 | SYNM    |
| P08247 | SYP     |
| P21579 | SYT1    |
| Q8NB59 | SYT14   |
| O43581 | SYT7    |
| P20366 | TAC1    |
| Q86UU9 | TAC4    |
| Q9Y6A5 | TACC3   |
| P25103 | TACR1   |
| P09758 | TACSTD2 |

|        |        |
|--------|--------|
| P37802 | TAGLN2 |
| P17542 | TAL1   |
| Q9H2K8 | TAOK3  |
| Q03518 | TAP1   |
| P17735 | TAT    |
| Q16635 | TAZ    |
| Q6ZT07 | TBC1D9 |
| O43435 | TBX1   |
| Q99081 | TCF12  |
| P15923 | TCF3   |
| Q9HCS4 | TCF7L1 |
| P15884 | TCF4   |
| Q9NQB0 | TCF7L2 |
| Q9UL49 | TCFL5  |
| Q2MV58 | TCTN1  |
| P28347 | TEAD1  |
| Q02763 | TEK    |
| Q5XG87 | TENT4A |
| Q96IP4 | TENT5A |
| P60484 | PTEN   |
| Q99973 | TEP1   |
| P54274 | TERF1  |
| O14746 | TERT   |
| Q8NFU7 | TET1   |
| Q6N021 | TET2   |
| O43151 | TET3   |
| Q8IYF3 | TEX11  |
| P02787 | TF     |
| Q00059 | TFAM   |
| P05549 | TFAP2A |
| P19484 | TFEB   |
| Q07654 | TFF3   |
| P48307 | TFPI2  |
| P02786 | TFRC   |
| P01135 | TGFA   |
| P01137 | TGFB1  |
| P61812 | TGFB2  |
| Q15582 | TGFB1  |
| P37173 | TGFB2  |
| Q9GZN2 | TGIF2  |
| P21980 | TGM2   |
| P07996 | THBS1  |
| P35442 | THBS2  |

|        |           |
|--------|-----------|
| Q5T1C6 | THEM4     |
| P04216 | THY1      |
| Q86XR7 | TICAM2    |
| Q9NQ88 | TIGAR     |
| Q9UNS1 | TIMELESS  |
| O60220 | TIMM8A    |
| P01033 | TIMP1     |
| P16035 | TIMP2     |
| P35625 | TIMP3     |
| P29401 | TKT       |
| Q16832 | DDR2      |
| P51854 | TKTL1     |
| Q9UKI8 | TLK1      |
| O60603 | TLR2      |
| O00206 | TLR4      |
| Q9NYK1 | TLR7      |
| Q9NR96 | TLR9      |
| O76062 | TM7SF2    |
| Q9Y3A6 | TMED5     |
| Q9Y3B3 | TMED7     |
| Q8TBQ9 | TMEM167A  |
| Q96B42 | TMEM18    |
| Q9NWC5 | TMEM45A   |
| Q9BXS4 | TMEM59    |
| Q6P5X7 | TMEM71    |
| Q5BJF2 | TMEM97    |
| Q9NZQ9 | TMOD4     |
| P57727 | TMPRSS3   |
| Q9NRS4 | TMPRSS4   |
| P62328 | TMSB4X    |
| P24821 | TNC       |
| P01375 | TNF       |
| Q03169 | TNFAIP2   |
| Q6P589 | TNFAIP8L2 |
| O00220 | TNFRSF10A |
| O14763 | TNFRSF10B |
| O14798 | TNFRSF10C |
| Q9UBN6 | TNFRSF10D |
| Q9Y6Q6 | TNFRSF11A |
| O00300 | TNFRSF11B |
| Q9NP84 | TNFRSF12A |
| O14836 | TNFRSF13B |
| Q9NS68 | TNFRSF19  |

|        |          |
|--------|----------|
| P20333 | TNFRSF1B |
| P43489 | TNFRSF4  |
| O95407 | TNFRSF6B |
| Q07011 | TNFRSF9  |
| P50591 | TNFSF10  |
| O43508 | TNFSF12  |
| O95150 | TNFSF15  |
| P23510 | TNFSF4   |
| P32971 | TNFSF8   |
| Q15025 | TNIP1    |
| Q07912 | TNK2     |
| Q9H2S6 | TNMD     |
| Q9Y4F4 | TOGARAM1 |
| P11388 | TOP2A    |
| O94842 | TOX4     |
| P04637 | TP53     |
| Q12888 | TP53BP1  |
| Q96A56 | TP53INP1 |
| O15350 | TP73     |
| Q9ULQ1 | TPCN1    |
| P55327 | TPD52    |
| O43399 | TPD52L2  |
| P60174 | TPI1     |
| P09493 | TPM1     |
| P06753 | TPM3     |
| O94811 | TPPP     |
| Q9BW30 | TPPP3    |
| P13693 | TPT1     |
| P0DSE1 | TRA      |
| P0DTU3 | TRA      |
| Q13595 | TRA2A    |
| P62995 | TRA2B    |
| A6NFA1 | TRABD2B  |
| Q15628 | TRADD    |
| Q13077 | TRAF1    |
| Q12933 | TRAF2    |
| O43734 | TRAF3IP2 |
| O00463 | TRAF5    |
| Q9Y4K3 | TRAF6    |
| Q15629 | TRAM1    |
| Q12931 | TRAP1    |
| Q58FF3 | HSP90B2P |
| Q6PIZ9 | TRAT1    |



|        |         |
|--------|---------|
| O43280 | TREH    |
| Q9NZC2 | TREM2   |
| Q9NSU2 | TREX1   |
| Q96RU8 | TRIB1   |
| Q92519 | TRIB2   |
| Q96F44 | TRIM11  |
| Q14142 | TRIM14  |
| O15164 | TRIM24  |
| P14373 | TRIM27  |
| Q13263 | TRIM28  |
| Q14134 | TRIM29  |
| O75382 | TRIM3   |
| Q9BZY9 | TRIM31  |
| O94972 | TRIM37  |
| Q96DX7 | TRIM44  |
| Q9H8W5 | TRIM45  |
| Q8IWR1 | TRIM59  |
| Q9BZR9 | TRIM8   |
| Q9H2D6 | TRIOBP  |
| P48995 | TRPC1   |
| Q9UL62 | TRPC5   |
| Q9Y210 | TRPC6   |
| Q96QT4 | TRPM7   |
| Q7Z2W7 | TRPM8   |
| Q8NER1 | TRPV1   |
| Q9Y5S1 | TRPV2   |
| Q9HBA0 | TRPV4   |
| Q96A04 | TSACC   |
| P49815 | TSC2    |
| Q63HK5 | TSHZ3   |
| Q12999 | TSPAN31 |
| P19075 | TSPAN8  |
| B1AH88 | TSPO    |
| P30536 | TSPO    |
| Q86VY4 | TSPYL5  |
| Q6IQ55 | TTBK2   |
| O95801 | TTC4    |
| P33981 | TTK     |
| P02766 | TTR     |
| Q9H313 | TTYH1   |
| Q13509 | TUBB3   |
| O75896 | TUSC2   |
| Q13454 | TUSC3   |

|        |          |
|--------|----------|
| Q15672 | TWIST1   |
| P10599 | TXN      |
| Q9H3M7 | TXNIP    |
| Q16881 | TXNRD1   |
| P19971 | TYMP     |
| P04818 | TYMS     |
| Q01081 | U2AF1    |
| Q5T6F2 | UBAP2    |
| Q14157 | UBAP2L   |
| O15205 | UBD      |
| O00762 | UBE2C    |
| P63279 | UBE2I    |
| P61088 | UBE2N    |
| Q16763 | UBE2S    |
| Q15386 | UBE3C    |
| Q04323 | UBXN1    |
| P09936 | UCHL1    |
| P55089 | UCN      |
| Q969E3 | UCN3     |
| Q16851 | UGP2     |
| Q16880 | UGT8     |
| Q96T88 | UHRF1    |
| Q96PU4 | UHRF2    |
| O75385 | ULK1     |
| Q8IYT8 | ULK2     |
| Q6ZN44 | UNC5A    |
| Q92900 | UPF1     |
| Q96BW1 | UPRT     |
| P22695 | UQCRC2   |
| P47985 | UQCRFS1  |
| Q8TCY9 | URGCP    |
| P22415 | USF1     |
| O94782 | USP1     |
| Q9Y4E8 | USP15    |
| Q6R6M4 | USP17L2  |
| Q0WX57 | USP17L24 |
| Q9UPT9 | USP22    |
| Q53GS9 | USP39    |
| Q9H0E7 | USP44    |
| Q86UV5 | USP48    |
| Q93009 | USP7     |
| Q93008 | USP9X    |
| P46939 | UTRN     |

|        |         |
|--------|---------|
| P51809 | VAMP7   |
| Q9BV40 | VAMP8   |
| Q9ULK5 | VANGL2  |
| Q6EMK4 | VASN    |
| P50552 | VASP    |
| P54219 | SLC18A1 |
| Q99536 | VAT1    |
| P19320 | VCAM1   |
| P13611 | VCAN    |
| P18206 | VCL     |
| P45880 | VDAC2   |
| P11473 | VDR     |
| P15692 | VEGFA   |
| P49767 | VEGFC   |
| O43915 | VEGFD   |
| P40337 | VHL     |
| P08670 | VIM     |
| P01282 | VIP     |
| Q8NEZ2 | VPS37A  |
| Q9UID3 | VPS51   |
| Q15906 | VPS72   |
| Q99986 | VRK1    |
| Q9Y279 | VSIG4   |
| P62760 | VSNL1   |
| Q96AJ9 | VTI1A   |
| P04004 | VTN     |
| P04275 | VWF     |
| Q9Y6W5 | WASF2   |
| O00401 | WASL    |
| Q969T9 | WBP2    |
| O75083 | WDR1    |
| Q8WWQ0 | PHIP    |
| Q9BZH6 | WDR11   |
| P30291 | WEE1    |
| Q9Y5W5 | WIF1    |
| Q5T9L3 | WLS     |
| Q9H4A3 | WNK1    |
| Q9Y3S1 | WNK2    |
| P04628 | WNT1    |
| O96014 | WNT11   |
| P09544 | WNT2    |
| Q93097 | WNT2B   |
| P56704 | WNT3A   |

|        |         |
|--------|---------|
| P41221 | WNT5A   |
| O00755 | WNT7A   |
| P56706 | WNT7B   |
| Q14191 | WRN     |
| P19544 | WT1     |
| Q15007 | WTAP    |
| Q6AWC2 | WWC2    |
| Q9NZC7 | WWOX    |
| Q9H0M0 | WWP1    |
| O00308 | WWP2    |
| Q9GZV5 | WWTR1   |
| Q6GPH4 | XAF1    |
| P17861 | XBP1    |
| P47992 | XCL1    |
| P98170 | XIAP    |
| O14980 | XPO1    |
| P18887 | XRCC1   |
| O43542 | XRCC3   |
| Q13426 | XRCC4   |
| P13010 | XRCC5   |
| P12956 | XRCC6   |
| P46937 | YAP1    |
| P67809 | YBX1    |
| O95619 | YEATS4  |
| P25490 | YY1     |
| P43403 | ZAP70   |
| Q05516 | ZBTB16  |
| Q9Y2Y4 | ZBTB32  |
| Q86T24 | ZBTB33  |
| Q86UZ6 | ZBTB46  |
| Q9NUE0 | ZDHHC18 |
| Q8IYP9 | ZDHHC23 |
| Q9C0B5 | ZDHHC5  |
| P37275 | ZEB1    |
| O60315 | ZEB2    |
| P16415 | ZNF823  |
| P26651 | ZFP36   |
| Q07352 | ZFP36L1 |
| Q96MM3 | ZFP42   |
| Q8WW38 | ZFPM2   |
| P17010 | ZFX     |
| Q8N5A5 | ZGPAT   |
| Q9Y6X8 | ZHX2    |

|        |           |
|--------|-----------|
| Q8N9L1 | ZIC4      |
| Q96T25 | ZIC5      |
| O75800 | ZMYND10   |
| P52747 | ZNF143    |
| O75362 | ZNF217    |
| O43296 | ZNF264    |
| Q9Y2X9 | ZNF281    |
| Q8WUU4 | ZNF296    |
| Q5BKZ1 | ZNF326    |
| Q2M1K9 | ZNF423    |
| Q9C0F3 | ZNF436    |
| Q8IZM8 | ZNF654    |
| O60232 | ZNRD2     |
| O95218 | ZRANB2    |
| Q15942 | ZYX       |
| Q8N0V4 | LGI2      |
| Q92574 | TSC1      |
| Q7Z699 | SPRED1    |
| B2CW77 | KLLN      |
| P09104 | ENO2      |
| P13591 | NCAM1     |
| Q9HCJ1 | ANKH      |
| Q6ZV60 | LINC00173 |
| Q15283 | RASA2     |
| C9JLR9 | C11orf95  |
| Q8IXJ9 | ASXL1     |
| P01920 | HLA-DQB1  |
| Q9Y570 | PPME1     |
| P12643 | BMP2      |
| Q13541 | EIF4EBP1  |
| Q5TEC6 | H3-2      |
| P06401 | PGR       |
| Q9H3R0 | KDM4C     |
| Q9BVC4 | MLST8     |
| P21912 | SDHB      |
| Q07890 | SOS2      |
| Q10571 | MN1       |
| O43300 | LRRTM2    |
| O75325 | LRRN2     |
| P53355 | DAPK1     |
| P07949 | RET       |
| P22309 | UGT1A1    |
| P43355 | MAGEA1    |

|        |           |
|--------|-----------|
| Q09472 | EP300     |
| Q9UMX1 | SUFU      |
| Q15382 | RHEB      |
| Q8TB45 | DEPTOR    |
| P85299 | PRR5      |
| O15530 | PDPK1     |
| P01730 | CD4       |
| Q14678 | KANK1     |
| P20248 | CCNA2     |
| Q969G3 | SMARCE1   |
| O15550 | KDM6A     |
| P23515 | OMG       |
| O60235 | TMPRSS11D |
| Q71DI3 | H3C15     |
| Q92793 | CREBBP    |
| P00519 | ABL1      |
| P00374 | DHFR      |
| P55055 | NR1H2     |
| Q9Y2J2 | EPB41L3   |
| P01148 | GNRH1     |
| O75410 | TACC1     |
| O15355 | PPM1G     |
| Q9Y258 | CCL26     |
| P32297 | CHRNA3    |
| Q9UQ13 | SHOC2     |
| Q9P0N9 | TBC1D7    |
| A8K2U0 | A2ML1     |
| Q9Y383 | LUC7L2    |
| Q8NFP7 | NUDT10    |
| Q9BW91 | NUDT9     |
| Q9HBV1 | POPDC3    |
| Q9H853 | TUBA4B    |
| Q6ZU15 | SEPTIN14  |
| A6NCK2 | TRIM43B   |
| O75581 | LRP6      |
| P01008 | SERPINC1  |
| P31946 | YWHAB     |
| O15520 | FGF10     |
| P62424 | RPL7A     |
| P46597 | ASMT      |
| P99999 | CYCS      |
| Q15329 | E2F5      |
| Q4LE39 | ARID4B    |

|        |          |
|--------|----------|
| Q16254 | E2F4     |
| P08729 | KRT7     |
| Q96SD1 | DCLRE1C  |
| O43186 | CRX      |
| Q99835 | SMO      |
| Q9NWM0 | SMOX     |
| P36894 | BMPR1A   |
| Q7Z698 | SPRED2   |
| Q9UF02 | CACNG5   |
| Q2MJR0 | SPRED3   |
| Q9NZI7 | UBP1     |
| O43610 | SPRY3    |
| Q9NZP0 | OR6C3    |
| P22004 | BMP6     |
| P29590 | PML      |
| P53779 | MAPK10   |
| Q16611 | BAK1     |
| O75888 | TNFSF13  |
| P01210 | PENK     |
| Q15303 | ERBB4    |
| P62993 | GRB2     |
| Q9P0J6 | MRPL36   |
| P36402 | TCF7     |
| P62942 | FKBP1A   |
| P10645 | CHGA     |
| Q6P2D8 | XRRA1    |
| Q8TAK6 | OLIG1    |
| Q52LW3 | ARHGAP29 |
| O95096 | NKX2-2   |
| P20226 | TBP      |
| P16389 | KCNA2    |
| P10523 | SAG      |
| Q9Y6P5 | SESN1    |
| P15172 | MYOD1    |
| P49137 | MAPKAPK2 |
| O15169 | AXIN1    |
| Q00604 | NDP      |
| P51959 | CCNG1    |
| Q9UKX5 | ITGA11   |
| Q6U949 | IGF2-AS  |
| P29353 | SHC1     |
| Q16655 | MLANA    |
| Q86UD0 | SAPCD2   |

|        |          |
|--------|----------|
| O00459 | PIK3R2   |
| P60059 | SEC61G   |
| P98155 | VLDLR    |
| P54132 | BLM      |
| O00744 | WNT10B   |
| Q9H2X9 | SLC12A5  |
| P43657 | LPAR6    |
| P27694 | RPA1     |
| P20908 | COL5A1   |
| P21675 | TAF1     |
| P10768 | ESD      |
| Q9BQB4 | SOST     |
| Q99708 | RBBP8    |
| Q969F8 | KISS1R   |
| Q14186 | TFDP1    |
| Q14114 | LRP8     |
| Q92499 | DDX1     |
| Q09028 | RBBP4    |
| Q96MU8 | KREMEN1  |
| Q9NPI8 | FANCF    |
| Q9UHL9 | GTF2IRD1 |
| Q16666 | IFI16    |
| P17480 | UBTF     |
| Q8TDY2 | RB1CC1   |
| O75943 | RAD17    |
| O96020 | CCNE2    |
| P32519 | ELF1     |
| Q9H9Q4 | NHEJ1    |
| Q15726 | KISS1    |
| P28749 | RBL1     |
| Q9UBV4 | WNT16    |
| P17544 | ATF7     |
| Q8NB91 | FANCB    |
| Q00526 | CDK3     |
| O75140 | DEPDC5   |
| Q5VTD9 | GFI1B    |
| P35659 | DEK      |
| Q8IUD6 | RNF135   |
| O95239 | KIF4A    |
| P10745 | RBP3     |
| Q15554 | TERF2    |
| Q16576 | RBBP7    |
| Q99435 | NELL2    |



|        |           |
|--------|-----------|
| P47736 | RAP1GAP   |
| Q15276 | RABEP1    |
| Q14188 | TFDP2     |
| Q5T4S7 | UBR4      |
| O75143 | ATG13     |
| P29374 | ARID4A    |
| P07814 | EPRS1     |
| O95678 | KRT75     |
| P22794 | EVI2A     |
| O75884 | RBBP9     |
| Q7Z7A3 | CTU1      |
| P34910 | EVI2B     |
| Q9BPY3 | FAM118B   |
| Q14696 | MESD      |
| Q9Y236 | OSGIN2    |
| A6NHX0 | CASTOR2   |
| P30872 | SSTR1     |
| P30793 | GCH1      |
| P53370 | NUDT6     |
| Q9BUL8 | PDCD10    |
| Q9Y6Y1 | CAMTA1    |
| Q15742 | NAB2      |
| P60022 | DEFB1     |
| Q12792 | TWF1      |
| P41161 | ETV5      |
| P45984 | MAPK9     |
| Q9GZP0 | PDGFD     |
| P23368 | ME2       |
| Q14980 | NUMA1     |
| O95750 | FGF19     |
| Q5T036 | FAM120AOS |
| Q8NDV2 | GPR26     |
| P05129 | PRKCG     |
| Q96C34 | RUNDC1    |
| O95373 | IPO7      |
| Q14147 | DHX34     |
| Q86U86 | PBRM1     |
| P55210 | CASP7     |
| P16422 | EPCAM     |
| Q8NCR3 | MFI       |
| Q92466 | DDB2      |
| P09543 | CNP       |
| P69892 | HBG2      |

|        |         |
|--------|---------|
| P51668 | UBE2D1  |
| Q9H3S1 | SEMA4A  |
| P60866 | RPS20   |
| Q9Y6X0 | SETBP1  |
| Q16658 | FSCN1   |
| Q9Y2M0 | FAN1    |
| Q8N1L9 | BATF2   |
| P49763 | PGF     |
| P08195 | SLC3A2  |
| Q8WXG9 | ADGRV1  |
| O95257 | GADD45G |
| O14964 | HGS     |
| Q13283 | G3BP1   |
| Q9UQM7 | CAMK2A  |
| P21583 | KITLG   |
| P11387 | TOP1    |
| Q9UHF7 | TRPS1   |
| Q9NZR2 | LRP1B   |
| Q6V1X1 | DPP8    |
| Q6S5L8 | SHC4    |
| Q8IX29 | FBXO16  |
| Q86V59 | PNMA8A  |
| P03971 | AMH     |
| P14174 | MIF     |
| P08684 | CYP3A4  |
| P41222 | PTGDS   |
| Q9Y2J4 | AMOTL2  |
| P05141 | SLC25A5 |
| Q01082 | SPTBN1  |
| Q6Q0C0 | TRAF7   |
| Q3BBV0 | NBPF1   |
| P98077 | SHC2    |
| O00212 | RHOD    |
| Q7Z2Z2 | EFL1    |
| P10644 | PRKAR1A |
| P27448 | MARK3   |
| Q99062 | CSF3R   |
| Q14896 | MYBPC3  |
| P30041 | PRDX6   |
| P11171 | EPB41   |
| P50440 | GATM    |
| P15509 | CSF2RA  |
| P32754 | HPD     |

|        |          |
|--------|----------|
| P32745 | SSTR3    |
| Q05209 | PTPN12   |
| O75496 | GMNN     |
| P33260 | CYP2C18  |
| Q10567 | AP1B1    |
| P56377 | AP1S2    |
| O15232 | MATN3    |
| Q02928 | CYP4A11  |
| Q9H6I2 | SOX17    |
| O75928 | PIAS2    |
| O95271 | TNKS     |
| Q08477 | CYP4F3   |
| Q8N157 | AHI1     |
| Q9H1V8 | SLC6A17  |
| P35346 | SSTR5    |
| Q15561 | TEAD4    |
| P06126 | CD1A     |
| Q9Y3M2 | CBY1     |
| Q4VCS5 | AMOT     |
| Q96RE7 | NACC1    |
| P41238 | APOBEC1  |
| Q4AC94 | C2CD3    |
| Q5SZK8 | FREM2    |
| Q9UI47 | CTNNA3   |
| P09067 | HOXB5    |
| Q9BYD1 | MRPL13   |
| Q68CZ1 | RPGRIP1L |
| Q02543 | RPL18A   |
| Q9UJ71 | CD207    |
| Q9HB15 | KCNK12   |
| Q2M1P5 | KIF7     |
| P29016 | CD1B     |
| P15812 | CD1E     |
| P31267 | HOXA6    |
| Q9Y399 | MRPS2    |
| Q5TAQ9 | DCAF8    |
| O75177 | SS18L1   |
| P52815 | MRPL12   |
| Q9NSI6 | BRWD1    |
| Q6ZRV2 | FAM83H   |
| Q8IY63 | AMOTL1   |
| Q9NQ79 | CRTAC1   |
| Q13938 | CAPS     |

|        |           |
|--------|-----------|
| Q9ULU8 | CADPS     |
| Q8TD26 | CHD6      |
| P82930 | MRPS34    |
| O15263 | DEFB4A    |
| Q9NRA8 | EIF4ENIF1 |
| O75631 | UPK3A     |
| Q86YS3 | RAB11FIP4 |
| Q9H7D0 | DOCK5     |
| Q9NYH9 | UTP6      |
| Q9BYB4 | GNB1L     |
| Q9UKT5 | FBXO4     |
| Q9NPF8 | ADAP2     |
| Q5TCH4 | CYP4A22   |
| Q16540 | MRPL23    |
| Q8TBK2 | SETD6     |
| Q9GZN6 | SLC6A16   |
| O75564 | JRK       |
| Q8IYT4 | KATNAL2   |
| Q14135 | VGLL4     |
| Q7Z739 | YTHDF3    |
| Q13495 | MAMLD1    |
| Q8TEB9 | RHBDD1    |
| P0DPB3 | SCHIP1    |
| P83881 | RPL36A    |
| Q8TER0 | SNED1     |
| Q2KHM9 | KIAA0753  |
| Q8TAV4 | STOML3    |
| Q9BQJ4 | TMEM47    |
| Q8N3Z3 | GTPBP8    |
| Q9C0E4 | GRIP2     |
| Q9BV90 | SNRNP25   |
| Q9NQV6 | PRDM10    |
| O75157 | TSC22D2   |
| Q9BT92 | TCHP      |
| Q96QE3 | ATAD5     |
| Q96QE4 | LRRC37B   |
| Q63HQ0 | AP1AR     |
| Q8WW12 | PCNP      |
| Q96QE5 | TEFM      |
| Q99990 | VGLL1     |
| Q5TID7 | CCDC181   |
| Q9NQ92 | COPRS     |
| Q5T5A4 | C1orf194  |

|            |              |
|------------|--------------|
| P0CG34     | TMSB15A      |
| Q8N268     | C20orf197    |
| P60331     | KRTAP10-1    |
| Q9Y693     | LHFPL6       |
| Q8IYF1     | ELOA2        |
| Q8N6C7     | MIR7-3HG     |
| Q6ZV56     | C22orf34     |
| Q6ZS62     | COLCA1       |
| Q17RA5     | C21orf62-AS1 |
| Q8NG57     | ELOA3P       |
| A6NH13     | DNAJC9-AS1   |
| Q3SY89     | ELOA3BP      |
| A0A1B0GTZ2 | CCDC196      |
| Q9Y6Z5     | AFDN-DT      |
| Q6ZST2     | COL25A1-DT   |
| O75427     | LRCH4        |
| Q6UXK5     | LRRN1        |
| A8MW92     | PHF20L1      |
| Q15759     | MAPK11       |
| Q16566     | CAMK4        |
| Q14012     | CAMK1        |
| P08700     | IL3          |
| Q33E94     | RFX4         |
| Q92915     | FGF14        |
| P78348     | ASIC1        |
| P55789     | GFER         |
| P16671     | CD36         |
| P13164     | IFITM1       |
| Q9NZP8     | C1RL         |
| P34972     | CNR2         |
| O14638     | ENPP3        |
| Q96S42     | NODAL        |
| P49765     | VEGFB        |
| P12034     | FGF5         |
| Q9NRA1     | PDGFC        |
| P51828     | ADCY7        |
| O43521     | BCL2L11      |
| Q8WWG1     | NRG4         |
| Q06416     | POU5F1B      |
| Q9HCB6     | SPON1        |
| P16581     | SELE         |
| P09917     | ALOX5        |
| Q99727     | TIMP4        |

|        |         |
|--------|---------|
| P43005 | SLC1A1  |
| Q15669 | RHOH    |
| P16885 | PLCG2   |
| Q13557 | CAMK2D  |
| P53778 | MAPK12  |
| O15264 | MAPK13  |
| P55075 | FGF8    |
| O60258 | FGF17   |
| Q9GZV9 | FGF23   |
| O43320 | FGF16   |
| Q8IU85 | CAMK1D  |
| Q96NX5 | CAMK1G  |
| O76093 | FGF18   |
| Q9NP95 | FGF20   |
| Q9NSA1 | FGF21   |
| P10767 | FGF6    |
| O75293 | GADD45B |
| Q9HCT0 | FGF22   |
| Q9NZT1 | CALML5  |
| Q96GE6 | CALML4  |
| Q8TD86 | CALML6  |
| Q8WXW3 | PIBF1   |
| Q8N1I0 | DOCK4   |
| Q6NV75 | GPR153  |
| Q9UL01 | DSE     |
| P43686 | PSMC4   |
| Q99466 | NOTCH4  |
| Q9Y6Q9 | NCOA3   |
| P14138 | EDN3    |
| P10600 | TGFB3   |
| P40967 | PMEL    |
| P19793 | RXRA    |
| Q14766 | LTBP1   |
| P13385 | TDGF1   |
| Q8WTR2 | DUSP19  |
| P52333 | JAK3    |
| O60234 | GMFG    |
| P17252 | PRKCA   |
| P17612 | PRKACA  |
| O95467 | GNAS    |
| P63092 | GNAS    |
| P84996 | GNAS    |
| Q5JWF2 | GNAS    |

|        |          |
|--------|----------|
| P05107 | ITGB2    |
| P62745 | RHOB     |
| P40261 | NNMT     |
| Q9UIW2 | PLXNA1   |
| P78310 | CXADR    |
| P28223 | HTR2A    |
| O95342 | ABCB11   |
| P98177 | FOXO4    |
| P55957 | BID      |
| P48745 | CCN3     |
| Q6AI39 | BICRAL   |
| P20800 | EDN2     |
| Q99707 | MTR      |
| P43119 | PTGIR    |
| P01563 | IFNA2    |
| P63096 | GNAI1    |
| P10301 | RRAS     |
| O95399 | UTS2     |
| P68363 | TUBA1B   |
| Q92887 | ABCC2    |
| P46098 | HTR3A    |
| P35716 | SOX11    |
| O15554 | KCNN4    |
| P36952 | SERPINB5 |
| O75376 | NCOR1    |
| P68400 | CSNK2A1  |
| P24666 | ACP1     |
| P14416 | DRD2     |
| P01374 | LTA      |
| Q96KQ7 | EHMT2    |
| P23229 | ITGA6    |
| Q6ZN18 | AEBP2    |
| P49757 | NUMB     |
| P11717 | IGF2R    |
| P22303 | ACHE     |
| P47989 | XDH      |
| Q12857 | NFIA     |
| P08034 | GJB1     |
| P60983 | GMFB     |
| P21453 | S1PR1    |
| Q06203 | PPAT     |
| P10276 | RARA     |
| P28827 | PTPRM    |

|        |          |
|--------|----------|
| P13598 | ICAM2    |
| Q9NYB0 | TERF2IP  |
| Q9H6U6 | BCAS3    |
| Q9NP60 | IL1RAPL2 |
| P25024 | CXCR1    |
| P42262 | GRIA2    |
| P16050 | ALOX15   |
| P52757 | CHN2     |
| Q96H15 | TIMD4    |
| Q9UJM3 | ERRFI1   |
| P32942 | ICAM3    |
| P29474 | NOS3     |
| P60323 | NANOS3   |
| P00491 | PNP      |
| P01298 | PPY      |
| P29597 | TYK2     |
| Q15077 | P2RY6    |
| P08588 | ADRB1    |
| Q5VTR2 | RNF20    |
| Q9UPP2 | IQSEC3   |
| O94864 | SUPT7L   |
| Q99542 | MMP19    |
| P24593 | IGFBP5   |
| O94760 | DDAH1    |
| P18847 | ATF3     |
| Q9H492 | MAP1LC3A |
| O15031 | PLXNB2   |
| P01286 | GHRH     |
| P23258 | TUBG1    |
| Q13609 | DNASE1L3 |
| Q9ULV4 | CORO1C   |
| P08519 | LPA      |
| P08571 | CD14     |
| Q08828 | ADCY1    |
| P30550 | GRPR     |
| Q96PG8 | BBC3     |
| Q9BXH1 | BBC3     |
| P10636 | MAPT     |
| Q96RQ9 | IL4I1    |
| P20941 | PDC      |
| Q92851 | CASP10   |
| P05109 | S100A8   |
| P21815 | IBSP     |



|        |         |
|--------|---------|
| P12524 | MYCL    |
| Q92521 | PIGB    |
| Q16602 | CALCRL  |
| P48740 | MASP1   |
| P18054 | ALOX12  |
| Q9H1Y0 | ATG5    |
| P21926 | CD9     |
| Q13573 | SNW1    |
| Q9BT40 | INPP5K  |
| O94817 | ATG12   |
| Q01638 | IL1RL1  |
| P20160 | AZU1    |
| P56211 | ARPP19  |
| Q3V6T2 | CCDC88A |
| Q9UMX3 | BOK     |
| P55286 | CDH8    |
| Q8IZJ6 | TDH     |
| P21580 | TNFAIP3 |
| Q03393 | PTS     |
| Q01518 | CAP1    |
| Q13114 | TRAF3   |
| Q9C010 | PKIB    |
| Q96ST3 | SIN3A   |
| Q29980 | MICB    |
| Q9UBL3 | ASH2L   |
| O95786 | DDX58   |
| O15527 | OGG1    |
| P80098 | CCL7    |
| P41273 | TNFSF9  |
| P43357 | MAGEA3  |
| P10075 | GLI4    |
| Q13976 | PRKG1   |
| Q06710 | PAX8    |
| Q13490 | BIRC2   |
| P20292 | ALOX5AP |
| Q8WUM4 | PDCD6IP |
| O95983 | MBD3    |
| Q96LC9 | BMF     |
| O15197 | EPHB6   |
| P17275 | JUNB    |
| P11498 | PC      |
| Q99496 | RNF2    |
| Q9P0K8 | FOXJ2   |

|        |          |
|--------|----------|
| P62070 | RRAS2    |
| P17301 | ITGA2    |
| P34130 | NTF4     |
| P56199 | ITGA1    |
| P32239 | CCKBR    |
| Q04756 | HGFAC    |
| P67775 | PPP2CA   |
| P0DP91 | ERCC6    |
| Q03468 | ERCC6    |
| O43543 | XRCC2    |
| Q11206 | ST3GAL4  |
| P62333 | PSMC6    |
| Q9UNE7 | STUB1    |
| P07492 | GRP      |
| Q3ZCW2 | LGALSL   |
| O95819 | MAP4K4   |
| P60510 | PPP4C    |
| Q01831 | XPC      |
| Q8N4N8 | KIF2B    |
| O14782 | KIF3C    |
| O75037 | KIF21B   |
| O00238 | BMPR1B   |
| P36776 | LONP1    |
| P07093 | SERPINE2 |
| Q00975 | CACNA1B  |
| Q15147 | PLCB4    |
| P08397 | HMBS     |
| O15244 | SLC22A2  |
| Q9UBY5 | LPAR3    |
| Q53FA7 | TP53I3   |
| P0C1Z6 | TFPT     |
| Q13797 | ITGA9    |
| Q05586 | GRIN1    |
| O95832 | CLDN1    |
| P41594 | GRM5     |
| P35462 | DRD3     |
| P08651 | NFIC     |
| Q8NAT1 | POMGNT2  |
| Q9Y618 | NCOR2    |
| O60825 | PFKFB2   |
| Q13683 | ITGA7    |
| P35372 | OPRM1    |
| Q16695 | H3-4     |

|        |          |
|--------|----------|
| P19256 | CD58     |
| Q92583 | CCL17    |
| P51677 | CCR3     |
| O60733 | PLA2G6   |
| Q9UBK2 | PPARGC1A |
| Q8TDS5 | OXER1    |
| Q05513 | PRKCZ    |
| P52564 | MAP2K6   |
| P06241 | FYN      |
| P28838 | LAP3     |
| P22102 | GART     |
| Q9BUT1 | BDH2     |
| O15455 | TLR3     |
| P63104 | YWHAZ    |
| O14907 | TAX1BP3  |
| P31152 | MAPK4    |
| P15248 | IL9      |
| Q13118 | KLF10    |
| P22003 | BMP5     |
| P08134 | RHOC     |
| P84095 | RHOG     |
| P38570 | ITGAE    |
| P04899 | GNAI2    |
| Q13017 | ARHGAP5  |
| P10997 | IAPP     |
| Q9H3H5 | DPAGT1   |
| Q13614 | MTMR2    |
| Q9UMD9 | COL17A1  |
| Q9H270 | VPS11    |
| Q9BUR4 | WRAP53   |
| P13798 | APEH     |
| Q15027 | ACAP1    |
| P07316 | CRYGB    |
| Q9Y296 | TRAPPC4  |
| Q70HW3 | SLC25A26 |
| Q9H3Y6 | SRMS     |
| Q9H892 | TTC12    |
| Q9UHA3 | RSL24D1  |
| Q9NPC7 | MYNN     |
| O43264 | ZW10     |
| Q5VZB9 | DMRTA1   |
| Q9BY12 | SCAPER   |
| Q9NS86 | LANCL2   |

|        |         |
|--------|---------|
| Q5HYJ3 | FAM76B  |
| Q9BQA5 | HINFP   |
| Q9P225 | DNAH2   |
| P11844 | CRYGA   |
| Q9NQC8 | IFT46   |
| Q9BSH3 | NICN1   |
| Q9H400 | LIME1   |
| A6NLP5 | TTC36   |
| Q8N9A8 | CNEP1R1 |
| Q8N4S0 | CCDC82  |
| O75964 | ATP5MG  |
| Q8NDF8 | TENT4B  |
| C9JDP6 | CLDN25  |
| Q96EL1 | INKA1   |
| Q9BVV2 | FNDC11  |
| Q86UT8 | CENATAC |
| P41597 | CCR2    |
| P53985 | SLC16A1 |
| Q9NZJ5 | EIF2AK3 |
| P36956 | SREBF1  |
| Q9HC58 | SLC24A3 |
| O75604 | USP2    |
| P32246 | CCR1    |
| P32969 | RPL9    |
| P28288 | ABCD3   |
| O75381 | PEX14   |
| P09683 | SCT     |
| O75173 | ADAMTS4 |
| P41231 | P2RY2   |
| O95747 | OXSR1   |
| P78325 | ADAM8   |
| Q5EG05 | CARD16  |
| P13987 | CD59    |
| P12757 | SKIL    |
| P51114 | FXR1    |
| Q16534 | HLF     |
| Q9UH65 | SWAP70  |
| P50391 | NPY4R   |
| P24723 | PRKCH   |
| Q04759 | PRKCQ   |
| O95622 | ADCY5   |
| Q86X55 | CARM1   |
| O60266 | ADCY3   |

|            |         |
|------------|---------|
| O43306     | ADCY6   |
| P22694     | PRKACB  |
| P28702     | RXRB    |
| O00443     | PIK3C2A |
| Q13163     | MAP2K5  |
| Q9UBS0     | RPS6KB2 |
| O60503     | ADCY9   |
| P49789     | FHIT    |
| P11487     | FGF3    |
| O75747     | PIK3C2G |
| Q8NFM4     | ADCY4   |
| Q9Y219     | JAG2    |
| P48443     | RXRG    |
| Q13323     | BIK     |
| Q9HC35     | EML4    |
| Q99527     | GPER1   |
| A0A087X1C5 | CYP2D7  |
| P10809     | HSPD1   |
| P10144     | GZMB    |
| Q15583     | TGIF1   |
| P21728     | DRD1    |
| P62877     | RBX1    |
| Q9H013     | ADAM19  |
| Q9GZT9     | EGLN1   |
| O00468     | AGRN    |
| P05198     | EIF2S1  |
| P07437     | TUBB    |
| P35680     | HNF1B   |
| P08572     | COL4A2  |
| P12109     | COL6A1  |
| Q15119     | PDK2    |
| O00487     | PSMD14  |
| O75094     | SLIT3   |
| Q96RU2     | USP28   |
| P52756     | RBM5    |
| P47710     | CSN1S1  |
| Q92922     | SMARCC1 |
| P43026     | GDF5    |
| Q99570     | PIK3R4  |
| P11215     | ITGAM   |
| P13497     | BMP1    |
| O14807     | MRAS    |
| Q8WYR1     | PIK3R5  |

|        |         |
|--------|---------|
| P20701 | ITGAL   |
| Q16659 | MAPK6   |
| P35070 | BTC     |
| P26010 | ITGB7   |
| Q6KF10 | GDF6    |
| Q9Y625 | GPC6    |
| P61328 | FGF12   |
| O00292 | LEFTY2  |
| P02775 | PPBP    |
| Q9UK05 | GDF2    |
| P12645 | BMP3    |
| P53708 | ITGA8   |
| P40225 | THPO    |
| Q14767 | LTBP2   |
| Q9NS15 | LTBP3   |
| P56975 | NRG3    |
| O75610 | LEFTY1  |
| Q8N2S1 | LTBP4   |
| O14511 | NRG2    |
| O60383 | GDF9    |
| O43903 | GAS2    |
| P01242 | GH2     |
| Q92914 | FGF11   |
| Q8NI99 | ANGPTL6 |
| Q9Y240 | CLEC11A |
| O95995 | GAS8    |
| P20774 | OGN     |
| Q9NTN9 | SEMA4G  |
| O75578 | ITGA10  |
| O95393 | BMP10   |
| P01229 | LHB     |
| Q7Z5Y6 | BMP8A   |
| P55107 | GDF10   |
| P58294 | PROK1   |
| P52198 | RND2    |
| Q13349 | ITGAD   |
| O43555 | GNRH2   |
| O14495 | PLPP3   |
| Q3YBR2 | TBRG1   |
| P05089 | ARG1    |
| Q14654 | KCNJ11  |
| Q02880 | TOP2B   |
| P08637 | FCGR3A  |

|        |          |
|--------|----------|
| Q13574 | DGKZ     |
| P48454 | PPP3CC   |
| Q16787 | LAMA3    |
| Q15262 | PTPRK    |
| Q9UEY8 | ADD3     |
| Q9Y4R8 | TELO2    |
| Q15599 | SLC9A3R2 |
| O43312 | MTSS1    |
| Q9UPM6 | LHX6     |
| Q86YN6 | PPARGC1B |
| Q99836 | MYD88    |
| Q08499 | PDE4D    |
| P08709 | F7       |
| P09525 | ANXA4    |
| O15245 | SLC22A1  |
| Q9BVP2 | GNL3     |
| Q13519 | PNOC     |
| Q92737 | RASL10A  |
| P29350 | PTPN6    |
| P37088 | SCNN1A   |
| P55064 | AQP5     |
| Q8WUI4 | HDAC7    |
| Q9UKV0 | HDAC9    |
| P48775 | TDO2     |
| Q16875 | PFKFB3   |
| Q8WUM9 | SLC20A1  |
| Q9BV57 | ADI1     |
| Q16690 | DUSP5    |
| P04844 | RPN2     |
| Q86WJ1 | CHD1L    |
| O76061 | STC2     |
| Q9NQG5 | RPRD1B   |
| O14893 | GEMIN2   |
| Q8N387 | MUC15    |
| Q96N19 | GPR137   |
| Q96AW1 | VOPP1    |
| Q92537 | SUSD6    |
| P0DMC3 | APELA    |
| P00492 | HPRT1    |
| P42330 | AKR1C3   |
| P19447 | ERCC3    |
| O60238 | BNIP3L   |
| Q9BRQ8 | AIFM2    |

|        |           |
|--------|-----------|
| Q9BZM5 | ULBP2     |
| Q9UIK5 | TMEFF2    |
| O60241 | ADGRB2    |
| P60880 | SNAP25    |
| P62826 | RAN       |
| P36897 | TGFBR1    |
| P54762 | EPHB1     |
| Q16623 | STX1A     |
| Q9UBX5 | FBLN5     |
| Q14031 | COL4A6    |
| Q9NSC2 | SALL1     |
| O43157 | PLXNB1    |
| P53420 | COL4A4    |
| P29400 | COL4A5    |
| O60285 | NUAK1     |
| P06703 | S100A6    |
| P10915 | HAPLN1    |
| O75078 | ADAM11    |
| P10147 | CCL3      |
| Q96JB5 | CDK5RAP3  |
| Q9H2V7 | SPNS1     |
| Q9Y657 | SPIN1     |
| Q70Z35 | PREX2     |
| Q9P287 | BCCIP     |
| Q9GZV7 | HAPLN2    |
| Q9ULC4 | MCTS1     |
| Q67FW5 | B3GNTL1   |
| Q7Z7M8 | B3GNT8    |
| Q8N6R0 | EEF1AKNMT |
| Q15714 | TSC22D1   |
| Q9NZJ0 | DTL       |
| P02790 | HPX       |
| Q12809 | KCNH2     |
| P61769 | B2M       |
| P49840 | GSK3A     |
| Q9UHW9 | SLC12A6   |
| P04839 | CYBB      |
| P19784 | CSNK2A2   |
| P10909 | CLU       |
| P28065 | PSMB9     |
| P60891 | PRPS1     |
| P35575 | G6PC      |
| P15502 | ELN       |



|        |          |
|--------|----------|
| P11908 | PRPS2    |
| P46663 | BDKRB1   |
| P51685 | CCR8     |
| Q96PY6 | NEK1     |
| Q92844 | TANK     |
| Q13330 | MTA1     |
| P13645 | KRT10    |
| P50219 | MNX1     |
| P34995 | PTGER1   |
| P51965 | UBE2E1   |
| Q96PM5 | RCHY1    |
| Q16585 | SGCB     |
| Q96FW1 | OTUB1    |
| Q96D96 | HVCN1    |
| Q14802 | FXD3     |
| Q9BZ11 | ADAM33   |
| Q9Y547 | HSPB11   |
| Q6PJ69 | TRIM65   |
| Q8NCD3 | HJURP    |
| Q9NYS0 | NKIRAS1  |
| Q9NUM3 | SLC39A9  |
| Q8IYD2 | KLHDC8A  |
| Q9BYJ0 | FGFBP2   |
| Q7Z3Z3 | PIWIL3   |
| B1AL88 | FAM155A  |
| Q6MZN7 | HCP5     |
| P98172 | EFNB1    |
| P41146 | OPRL1    |
| P17535 | JUND     |
| Q9BZM6 | ULBP1    |
| P08949 | NMB      |
| Q14956 | GPNMB    |
| P05164 | MPO      |
| P35579 | MYH9     |
| P62136 | PPP1CA   |
| P60033 | CD81     |
| O60880 | SH2D1A   |
| Q93063 | EXT2     |
| P07195 | LDHB     |
| Q9NPC2 | KCNK9    |
| Q9Y275 | TNFSF13B |
| P56159 | GFRA1    |
| P02765 | AHSG     |

|        |          |
|--------|----------|
| P43155 | CRAT     |
| Q02223 | TNFRSF17 |
| Q9UKE5 | TNIK     |
| Q9Y3E5 | PTRH2    |
| P27815 | PDE4A    |
| O60243 | HS6ST1   |
| P30048 | PRDX3    |
| Q9BUZ4 | TRAF4    |
| Q12923 | PTPN13   |
| P35590 | TIE1     |
| Q8TAA9 | VANGL1   |
| P61158 | ACTR3    |
| Q13952 | NFYC     |
| Q8TE12 | LMX1A    |
| Q01469 | FABP5    |
| Q8NFJ5 | GPRC5A   |
| Q9UBZ9 | REV1     |
| Q12967 | RALGDS   |
| P42830 | CXCL5    |
| Q96MM7 | HS6ST2   |
| Q9H1H9 | KIF13A   |
| Q5VV41 | ARHGEF16 |
| Q18PE1 | DOK7     |
| P47972 | NPTX2    |
| Q9NQT8 | KIF13B   |
| O60542 | PSPN     |
| Q9UKI2 | CDC42EP3 |
| Q9Y2G4 | ANKRD6   |
| Q99653 | CHP1     |
| Q9UHD1 | CHORDC1  |
| Q9HCM9 | TRIM39   |
| Q9BRK4 | LZTS2    |
| Q96T23 | RSF1     |
| Q8WW36 | ZCCHC13  |
| Q9ULE0 | WWC3     |
| A8MXQ7 | IQANK1   |
| P09172 | DBH      |
| P10827 | THRA     |
| P19883 | FST      |
| Q92952 | KCNN1    |
| O15111 | CHUK     |
| P43694 | GATA4    |
| Q04912 | MST1R    |

|        |          |
|--------|----------|
| Q15080 | NCF4     |
| P08174 | CD55     |
| P30519 | HMOX2    |
| Q07973 | CYP24A1  |
| P43034 | PAFAH1B1 |
| P36873 | PPP1CC   |
| P11234 | RALB     |
| P62495 | ETF1     |
| P45844 | ABCG1    |
| Q9Y5R2 | MMP24    |
| Q9NXR1 | NDE1     |
| Q9NPH3 | IL1RAP   |
| Q9Y4L1 | HYOU1    |
| Q96QK1 | VPS35    |
| Q8WU20 | FRS2     |
| Q06587 | RING1    |
| Q96PD4 | IL17F    |
| Q13596 | SNX1     |
| Q9Y266 | NUDC     |
| P11831 | SRF      |
| Q9Y4G8 | RAPGEF2  |
| Q96AY2 | EME1     |
| P50479 | PDLIM4   |
| P49862 | KLK7     |
| P22079 | LPO      |
| Q13112 | CHAF1B   |
| Q9H239 | MMP28    |
| Q9NPA2 | MMP25    |
| Q5T4F7 | SFRP5    |
| O60749 | SNX2     |
| P62280 | RPS11    |
| O60486 | PLXNC1   |
| O75436 | VPS26A   |
| Q01523 | DEFA5    |
| P50876 | RNF144A  |
| P35243 | RCVRN    |
| Q9P2N4 | ADAMTS9  |
| P62851 | RPS25    |
| P30408 | TM4SF1   |
| Q8IYD1 | GSPT2    |
| Q01664 | TFAP4    |
| Q9BX70 | BTBD2    |
| Q9UNH7 | SNX6     |

|        |           |
|--------|-----------|
| Q9BYH8 | NFKBIZ    |
| O60907 | TBL1X     |
| Q15013 | MAD2L1BP  |
| Q9Y2B0 | CNPY2     |
| Q6RUI8 | C19orf48  |
| P00395 | MT-CO1    |
| Q9HBH7 | BEX1      |
| P01854 | IGHE      |
| Q495Z4 | ASB16-AS1 |
| Q7Z7D3 | VTCN1     |
| Q96QU1 | PCDH15    |
| Q9Y616 | IRAK3     |
| Q9H3D4 | TP63      |
| P01024 | C3        |
| P13498 | CYBA      |
| Q13258 | PTGDR     |
| Q15399 | TLR1      |
| Q14739 | LBR       |
| P09960 | LTA4H     |
| P01031 | C5        |
| P04183 | TK1       |
| P02771 | AFP       |
| P12259 | F5        |
| P06734 | FCER2     |
| P12318 | FCGR2A    |
| P09871 | C1S       |
| P02745 | C1QA      |
| P00751 | CFB       |
| Q99574 | SERPINI1  |
| P06870 | KLK1      |
| Q14765 | STAT4     |
| P08686 | CYP21A2   |
| P16109 | SELP      |
| P49908 | SELENOP   |
| P49257 | LMAN1     |
| P02746 | C1QB      |
| P02747 | C1QC      |
| O00187 | MASP2     |
| P06681 | C2        |
| P02652 | APOA2     |
| O75306 | NDUFS2    |
| Q14626 | IL11RA    |
| Q9Y239 | NOD1      |

|        |          |
|--------|----------|
| P32418 | SLC8A1   |
| P17066 | HSPA6    |
| Q9H0E2 | TOLLIP   |
| Q9Y2C9 | TLR6     |
| Q8IUC6 | TICAM1   |
| P02748 | C9       |
| P30273 | FCER1G   |
| P51671 | CCL11    |
| Q9UNN5 | FAF1     |
| O75342 | ALOX12B  |
| P21953 | BCKDHB   |
| P09110 | ACAA1    |
| P21730 | C5AR1    |
| P07358 | C8B      |
| Q9NNX6 | CD209    |
| P98082 | DAB2     |
| O15524 | SOCS1    |
| O14508 | SOCS2    |
| Q96RU7 | TRIB3    |
| P13671 | C6       |
| P10643 | C7       |
| Q9Y6Y9 | LY96     |
| P78357 | CNTNAP1  |
| P54821 | PRRX1    |
| P29508 | SERPINB3 |
| Q9Y5U5 | TNFRSF18 |
| Q14242 | SELPLG   |
| Q9Y5K2 | KLK4     |
| Q9BYJ1 | ALOXE3   |
| P98171 | ARHGAP4  |
| P36941 | LTBR     |
| O15296 | ALOX15B  |
| P17213 | BPI      |
| P07357 | C8A      |
| P07360 | C8G      |
| Q9UQC9 | CLCA2    |
| P45877 | PPIC     |
| O43187 | IRAK2    |
| Q9Y5Y4 | PTGDR2   |
| Q9H2R5 | KLK15    |
| P51460 | INSL3    |
| P51686 | CCR9     |
| P55899 | FCGRT    |

|        |         |
|--------|---------|
| P30043 | BLVRB   |
| Q96CA5 | BIRC7   |
| Q9UJU5 | FOX D3  |
| P04003 | C4BPA   |
| P20851 | C4BPB   |
| P40198 | CEACAM3 |
| A8K7I4 | CLCA1   |
| P25713 | MT3     |
| Q9H4E7 | DEF6    |
| Q92841 | DDX17   |
| P11684 | SCGB1A1 |
| Q9H4L4 | SENP3   |
| Q9BXR5 | TLR10   |
| P60852 | ZP1     |
| Q09327 | MGAT3   |
| Q9UMF0 | ICAM5   |
| Q0D2K0 | NIPAL4  |
| Q99467 | CD180   |
| Q9BYP7 | WNK3    |
| Q8TAP4 | LMO3    |
| P22362 | CCL1    |
| Q99616 | CCL13   |
| O75689 | ADAP1   |
| Q8TDM6 | DLG5    |
| Q8WVN6 | SECTM1  |
| Q9UNG2 | TNFSF18 |
| Q969D9 | TSLP    |
| P49842 | STK19   |
| P01732 | CD8A    |
| P21145 | MAL     |
| P58753 | TIRAP   |
| Q5QGZ9 | CLEC12A |
| Q9BYE0 | HES7    |
| Q8TAX7 | MUC7    |
| Q01524 | DEFA6   |
| Q9BYW1 | SLC2A11 |
| O14544 | SOCS6   |
| Q8WXH5 | SOCS4   |
| Q6IBS0 | TWF2    |
| Q6W4X9 | MUC6    |
| P36508 | ZNF76   |
| O00175 | CCL24   |
| Q709F0 | ACAD11  |

|        |          |
|--------|----------|
| Q9UHP7 | CLEC2D   |
| Q9NPR9 | GPR108   |
| P59666 | DEFA3    |
| P12838 | DEFA4    |
| Q9P0M4 | IL17C    |
| Q14773 | ICAM4    |
| Q96P16 | RPRD1A   |
| O75717 | WDHD1    |
| Q674R7 | ATG9B    |
| Q9H6R0 | DHX33    |
| Q9UQP3 | TNN      |
| Q96AC6 | KIFC2    |
| O43281 | EFS      |
| O95104 | SCAF4    |
| Q5FYA8 | ARSH     |
| O95870 | ABHD16A  |
| Q8N690 | DEFB119  |
| Q969F2 | NKD2     |
| O95857 | TSPAN13  |
| Q8IY67 | RAVER1   |
| O95868 | LY6G6D   |
| Q5SQ64 | LY6G6F   |
| Q495B1 | ANKDD1A  |
| O60502 | OGA      |
| Q96DC7 | TMCO6    |
| O95388 | CCN4     |
| Q96PH6 | DEFB118  |
| Q7Z589 | EMSY     |
| Q5JRS4 | OR10J3   |
| Q9H1M4 | DEFB127  |
| Q9BYW3 | DEFB126  |
| P68366 | TUBA4A   |
| Q13275 | SEMA3F   |
| P24347 | MMP11    |
| P12814 | ACTN1    |
| P01009 | SERPINA1 |
| P19438 | TNFRSF1A |
| P35408 | PTGER4   |
| P43116 | PTGER2   |
| P09668 | CTSH     |
| P28799 | GRN      |
| P14679 | TYR      |
| Q03181 | PPARD    |

|        |         |
|--------|---------|
| P49662 | CASP4   |
| P08754 | GNAI3   |
| P22392 | NME2    |
| O76082 | SLC22A5 |
| P17643 | TYRP1   |
| P62508 | ESRRG   |
| P80404 | ABAT    |
| Q02224 | CENPE   |
| Q99500 | S1PR3   |
| P54727 | RAD23B  |
| P56539 | CAV3    |
| Q13370 | PDE3B   |
| Q9H015 | SLC22A4 |
| Q9H7Z7 | PTGES2  |
| Q15185 | PTGES3  |
| P49454 | CENPF   |
| Q96NY9 | MUS81   |
| Q9Y620 | RAD54B  |
| P32321 | DCTD    |
| P30301 | MIP     |
| Q8WZ33 | MAFIP   |
| Q99797 | MIPEP   |
| O14735 | CDIPT   |
| Q9Y2J8 | PADI2   |
| P24863 | CCNC    |
| Q9UKL0 | RCOR1   |
| Q8IV63 | VRK3    |
| Q17RS7 | GEN1    |
| Q03111 | MLLT1   |
| Q9HCU0 | CD248   |
| Q9BZM4 | ULBP3   |
| Q9BPX3 | NCAPG   |
| Q8TD07 | RAET1E  |
| Q6NS38 | ALKBH2  |
| Q8TF62 | ATP8B4  |
| O75452 | RDH16   |
| Q9GZX5 | ZNF350  |
| O60831 | PRAF2   |
| Q9BZM3 | GSX2    |
| Q8WYN3 | CSRNP3  |
| P60896 | SEM1    |
| Q6ZVN7 | SEM1    |
| Q9H8L6 | MMRN2   |



|        |          |
|--------|----------|
| Q9NT22 | EMILIN3  |
| Q9UK76 | JPT1     |
| O60224 | SSX4     |
| P13639 | EEF2     |
| P22455 | FGFR4    |
| O95718 | ESRRB    |
| Q07864 | POLE     |
| P16871 | IL7R     |
| P37837 | TALDO1   |
| P00736 | C1R      |
| P36382 | GJA5     |
| Q01432 | AMPD3    |
| O14764 | GABRD    |
| P35367 | HRH1     |
| O43837 | IDH3B    |
| Q9HBG4 | ATP6V0A4 |
| P31641 | SLC6A6   |
| O00161 | SNAP23   |
| P30533 | LRPAP1   |
| P25105 | PTAFR    |
| Q16548 | BCL2A1   |
| Q99418 | CYTH2    |
| P50749 | RASSF2   |
| Q13561 | DCTN2    |
| P47872 | SCTR     |
| Q02535 | ID3      |
| P52888 | THOP1    |
| P02818 | BGLAP    |
| O15551 | CLDN3    |
| Q9Y2K7 | KDM2A    |
| Q92187 | ST8SIA4  |
| Q9HD36 | BCL2L10  |
| Q86W56 | PARG     |
| Q8IYM9 | TRIM22   |
| P24390 | KDELRL1  |
| P38567 | SPAM1    |
| Q07687 | DLX2     |
| Q6NXG1 | ESRP1    |
| O95232 | LUC7L3   |
| O15218 | GPR182   |
| P41567 | EIF1     |
| Q15818 | NPTX1    |
| Q9BRU2 | TCEAL7   |

|        |            |
|--------|------------|
| P03923 | MT-ND6     |
| O95473 | SYNGR4     |
| P63302 | SELENOW    |
| Q99459 | CDC5L      |
| P11274 | BCR        |
| P48067 | SLC6A9     |
| P38646 | HSPA9      |
| P05187 | ALPP       |
| P19440 | GGT1       |
| P22736 | NR4A1      |
| P42684 | ABL2       |
| O00273 | DFFA       |
| Q9UG56 | PISD       |
| P46019 | PHKA2      |
| Q13191 | CBLB       |
| O15354 | GPR37      |
| P43007 | SLC1A4     |
| P20062 | TCN2       |
| Q05823 | RNASEL     |
| P07204 | THBD       |
| P32320 | CDA        |
| Q9Y2T4 | PPP2R2C    |
| Q9GZT4 | SRR        |
| Q01581 | HMGCS1     |
| Q9UF33 | EPHA6      |
| Q8N6G5 | CSGALNACT2 |
| Q96P70 | IPO9       |
| Q96S59 | RANBP9     |
| O60318 | MCM3AP     |
| O75508 | CLDN11     |
| O60906 | SMPD2      |
| O15056 | SYNJ2      |
| P18754 | RCC1       |
| Q8TDU6 | GPBAR1     |
| Q6B8I1 | DUSP13     |
| Q9UII6 | DUSP13     |
| Q68DV7 | RNF43      |
| Q6NUQ1 | RINT1      |
| Q9P0U1 | TOMM7      |
| Q8N271 | PROM2      |
| O96028 | NSD2       |
| Q8IZ40 | RCOR2      |
| Q96EF6 | FBXO17     |

|        |          |
|--------|----------|
| P79483 | HLA-DRB3 |
| P62258 | YWHAE    |
| P28329 | CHAT     |
| Q15853 | USF2     |
| P52803 | EFNA5    |
| Q9Y5Y7 | LYVE1    |
| Q9Y3D7 | PAM16    |
| O75807 | PPP1R15A |
| P28222 | HTR1B    |
| P29373 | CRABP2   |
| P14543 | NID1     |
| P54136 | RARS1    |
| Q8TDW4 | ST7L     |
| P02452 | COL1A1   |
| P49279 | SLC11A1  |
| P28221 | HTR1D    |
| P05408 | SCG5     |
| Q15223 | NECTIN1  |
| P43405 | SYK      |
| Q9Y6L6 | SLCO1B1  |
| O14788 | TNFSF11  |
| O94956 | SLCO2B1  |
| Q93070 | ART4     |
| Q99704 | DOK1     |
| Q13308 | PTK7     |
| O95613 | PCNT     |
| Q96BD0 | SLCO4A1  |
| Q9NYB5 | SLCO1C1  |
| P46721 | SLCO1A2  |
| Q13085 | ACACA    |
| P15428 | HPGD     |
| P30613 | PKLR     |
| Q15758 | SLC1A5   |
| Q01995 | TAGLN    |
| P15036 | ETS2     |
| P51948 | MNAT1    |
| P07197 | NEFM     |
| P49447 | CYB561   |
| Q96B97 | SH3KBP1  |
| Q15836 | VAMP3    |
| Q9BQG0 | MYBBP1A  |
| Q9NZL4 | HSPBP1   |
| Q9H1A3 | METTL9   |

|        |         |
|--------|---------|
| P60602 | ROMO1   |
| O00634 | NTN3    |
| Q6NSW7 | NANOGP8 |
| Q07157 | TJP1    |
| Q9NS75 | CYSLTR2 |
| P0DMS8 | ADORA3  |
| P21796 | VDAC1   |
| Q13822 | ENPP2   |
| Q9Y6W8 | ICOS    |
| Q9UPG8 | PLAGL2  |
| Q9UBF1 | MAGEC2  |
| P25098 | GRK2    |
| P30153 | PPP2R1A |
| P42702 | LIFR    |
| Q13510 | ASAH1   |
| P04080 | CSTB    |
| P63151 | PPP2R2A |
| Q14738 | PPP2R5D |
| P63027 | VAMP2   |
| Q9NR71 | ASAH2   |
| Q99684 | GFI1    |
| Q9NVI7 | ATAD3A  |
| O60925 | PFDN1   |
| Q9Y2H2 | INPP5F  |
| Q5T9A4 | ATAD3B  |
| Q5TB80 | CEP162  |
| P32929 | CTH     |
| Q96IQ7 | VSIG2   |
| P68133 | ACTA1   |
| Q13621 | SLC12A1 |
| P11279 | LAMP1   |
| P14207 | FOLR2   |
| Q9ULW0 | TPX2    |
| P22676 | CALB2   |
| P40313 | CTRL    |
| Q9UL45 | BLOC1S6 |
| P31943 | HNRNPH1 |
| Q8WVC0 | LEO1    |
| Q92576 | PHF3    |
| Q9BYN0 | SRXN1   |
| Q96DY2 | IQCD    |
| P30260 | CDC27   |
| P07101 | TH      |

|        |          |
|--------|----------|
| Q12906 | ILF3     |
| P23467 | PTPRB    |
| Q13740 | ALCAM    |
| Q8N6G6 | ADAMTSL1 |
| P07099 | EPHX1    |
| Q12882 | DPYD     |
| Q15139 | PRKD1    |
| Q9BY76 | ANGPTL4  |
| Q15078 | CDK5R1   |
| Q9P0X4 | CACNA1I  |
| O14497 | ARID1A   |
| Q8NFD5 | ARID1B   |
| Q8TAQ2 | SMARCC2  |
| Q15427 | SF3B4    |
| Q92925 | SMARCD2  |
| Q68CP9 | ARID2    |
| Q96GM5 | SMARCD1  |
| Q6STE5 | SMARCD3  |
| P62273 | RPS29    |
| Q15532 | SS18     |
| P78545 | ELF3     |
| Q9NP62 | GCM1     |
| P04217 | A1BG     |
| Q9H8M2 | BRD9     |
| Q4VC05 | BCL7A    |
| Q9BQE9 | BCL7B    |
| O75764 | TCEA3    |
| Q6UWM5 | GLIPR1L1 |
| Q8WXS4 | TMEM37   |
| Q9NVP4 | DZANK1   |
| P12107 | COL11A1  |
| P32238 | CCKAR    |
| P01160 | NPPA     |
| Q15149 | PLEC     |
| O60942 | RNGTT    |
| P13727 | PRG2     |
| Q6T4P5 | PLPPR3   |
| Q92626 | PXDN     |
| Q9BQ16 | SPOCK3   |
| Q07326 | PIGF     |
| Q13618 | CUL3     |
| Q9UGI8 | TES      |
| O00519 | FAAH     |

|        |         |
|--------|---------|
| Q7L5A8 | FA2H    |
| P27540 | ARNT    |
| P40937 | RFC5    |
| P31040 | SDHA    |
| P13051 | UNG     |
| Q13569 | TDG     |
| P08263 | GSTA1   |
| Q15654 | TRIP6   |
| P01903 | HLA-DRA |
| P26717 | KLRC2   |
| Q6UXS9 | CASP12  |
| O43252 | PAPSS1  |
| P78559 | MAP1A   |
| P55072 | VCP     |
| O43570 | CA12    |
| P09238 | MMP10   |
| P23497 | SP100   |
| Q06643 | LTB     |
| Q9NYB9 | ABI2    |
| P53396 | ACLY    |
| P62979 | RPS27A  |
| P51582 | P2RY4   |
| Q86SH2 | ZAR1    |
| P06276 | BCHE    |
| P00390 | GSR     |
| Q9BYX4 | IFIH1   |
| Q92993 | KAT5    |
| P11229 | CHRM1   |
| Q9UBU2 | DKK2    |
| O60895 | RAMP2   |
| Q96EP1 | CHFR    |
| Q13075 | NAIP    |
| Q92904 | DAZL    |
| Q15020 | SART3   |
| O15304 | SIVA1   |
| Q8IVL0 | NAV3    |
| Q99683 | MAP3K5  |
| Q99519 | NEU1    |
| P16860 | NPPB    |
| P30825 | SLC7A1  |
| P07998 | RNASE1  |
| Q92896 | GLG1    |
| Q14623 | IHH     |

|        |          |
|--------|----------|
| P02795 | MT2A     |
| P23141 | CES1     |
| Q00973 | B4GALNT1 |
| Q92854 | SEMA4D   |
| P30939 | HTR1F    |
| Q9Y5K6 | CD2AP    |
| P63208 | SKP1     |
| P08962 | CD63     |
| Q9UH73 | EBF1     |
| P28676 | GCA      |
| O43290 | SART1    |
| P43358 | MAGEA4   |
| Q96LB2 | MRGPRX1  |
| Q8NBP7 | PCSK9    |
| Q14643 | ITPR1    |
| P10912 | GHR      |
| Q13813 | SPTAN1   |
| Q9UJU2 | LEF1     |
| O43526 | KCNQ2    |
| P05156 | CFI      |
| P07954 | FH       |
| P00488 | F13A1    |
| P20823 | HNFB1A   |
| Q02127 | DHODH    |
| P21673 | SAT1     |
| Q9H2B4 | SLC26A1  |
| Q9H2H9 | SLC38A1  |
| O43525 | KCNQ3    |
| Q9Y6A1 | POMT1    |
| P32241 | VIPR1    |
| P23025 | XPA      |
| P36543 | ATP6V1E1 |
| Q14894 | CRYM     |
| O15287 | FANCG    |
| Q13162 | PRDX4    |
| Q15274 | QPRT     |
| Q9NS56 | TOPORS   |
| Q12846 | STX4     |
| P09210 | GSTA2    |
| Q9H4M9 | EHD1     |
| P27144 | AK4      |
| P46091 | GPR1     |
| Q9UQ80 | PA2G4    |

|        |          |
|--------|----------|
| Q9NZN3 | EHD3     |
| Q9NZN4 | EHD2     |
| Q9UNY4 | TTF2     |
| Q9H223 | EHD4     |
| O43809 | NUDT21   |
| O76050 | NEURL1   |
| Q9H299 | SH3BGRL3 |
| O60242 | ADGRB3   |
| O75506 | HSBP1    |
| Q02833 | RASSF7   |
| Q86X51 | EZHIP    |
| Q03431 | PTH1R    |
| P35270 | SPR      |
| P51178 | PLCD1    |
| Q13507 | TRPC3    |
| P33991 | MCM4     |
| Q99759 | MAP3K3   |
| P29275 | ADORA2B  |
| P00568 | AK1      |
| P09471 | GNAO1    |
| Q13422 | IKZF1    |
| Q15858 | SCN9A    |
| Q01970 | PLCB3    |
| P52732 | KIF11    |
| P08913 | ADRA2A   |
| P49711 | CTCF     |
| P11532 | DMD      |
| P11912 | CD79A    |
| Q99720 | SIGMAR1  |
| Q13651 | IL10RA   |
| P62714 | PPP2CB   |
| Q14542 | SLC29A2  |
| Q8WVQ1 | CANT1    |
| P35754 | GLRX     |
| P21399 | ACO1     |
| Q9C0B1 | FTO      |
| O43181 | NDUFS4   |
| Q08334 | IL10RB   |
| P18077 | RPL35A   |
| Q93034 | CUL5     |
| P78508 | KCNJ10   |
| P19086 | GNAZ     |
| Q03933 | HSF2     |



|            |           |
|------------|-----------|
| P02549     | SPTA1     |
| Q16739     | UGCG      |
| P48200     | IREB2     |
| Q86XK2     | FBXO11    |
| Q9UKB1     | FBXW11    |
| Q99700     | ATXN2     |
| P14091     | CTSE      |
| Q9NR09     | BIRC6     |
| P84098     | RPL19     |
| Q99608     | NDN       |
| P46781     | RPS9      |
| Q92752     | TNR       |
| Q9Y496     | KIF3A     |
| Q9UKP6     | UTS2R     |
| Q9UBI6     | GNG12     |
| Q96PD2     | DCBLD2    |
| O60573     | EIF4E2    |
| P61604     | HSPE1     |
| Q13888     | GTF2H2    |
| Q9UQ49     | NEU3      |
| Q16348     | SLC15A2   |
| O95707     | POP4      |
| P0DMW2     | NLRP2B    |
| P63215     | GNG3      |
| Q9Y483     | MTF2      |
| Q9GZY8     | MFF       |
| Q01101     | INSM1     |
| Q96QF0     | RAB3IP    |
| O43303     | CCP110    |
| Q96HE7     | ERO1A     |
| Q96LT9     | RNPC3     |
| O60356     | NUPR1     |
| P56381     | ATP5F1E   |
| O60477     | BRINP1    |
| P58180     | OR4D2     |
| Q9BQY4     | RHOXF2    |
| P0CF75     | EBLN1     |
| A0A075B6S2 | IGKV2D-29 |
| P14778     | IL1R1     |
| P12111     | COL6A3    |
| O00213     | APBB1     |
| P22626     | HNRNPA2B1 |
| Q96AP0     | ACD       |

|        |         |
|--------|---------|
| Q15047 | SETDB1  |
| P23771 | GATA3   |
| P24001 | IL32    |
| Q15782 | CHI3L2  |
| P19957 | PI3     |
| P51170 | SCNN1G  |
| O75962 | TRIO    |
| P81172 | HAMP    |
| Q03519 | TAP2    |
| Q9UDX4 | SEC14L3 |
| Q9Y5J3 | HEY1    |
| O15533 | TAPBP   |
| Q9UKW4 | VAV3    |
| Q9NQW6 | ANLN    |
| Q8IZL9 | CDK20   |
| P53609 | PGGT1B  |
| Q96JB1 | DNAH8   |
| Q9NV64 | TMEM39A |
| P50148 | GNAQ    |
| P47712 | PLA2G4A |
| O14649 | KCNK3   |
| P31785 | IL2RG   |
| P45379 | TNNT2   |
| Q71U36 | TUBA1A  |
| P56817 | BACE1   |
| P08236 | GUSB    |
| P22894 | MMP8    |
| Q99697 | PITX2   |
| P13647 | KRT5    |
| P02533 | KRT14   |
| Q04917 | YWHAH   |
| P27348 | YWHAQ   |
| P41181 | AQP2    |
| P12277 | CKB     |
| P20810 | CAST    |
| Q16653 | MOG     |
| Q13639 | HTR4    |
| P05165 | PCCA    |
| Q9NVS9 | PNPO    |
| P32243 | OTX2    |
| Q14573 | ITPR3   |
| Q06278 | AOX1    |
| P25685 | DNAJB1  |

|        |          |
|--------|----------|
| Q14833 | GRM4     |
| P14859 | POU2F1   |
| P16298 | PPP3CB   |
| Q9Y6H5 | SNCAIP   |
| P62837 | UBE2D2   |
| P17600 | SYN1     |
| O14818 | PSMA7    |
| P04155 | TFF1     |
| Q86UL8 | MAGI2    |
| P50052 | AGTR2    |
| O76090 | BEST1    |
| P01225 | FSHB     |
| P20265 | POU3F2   |
| Q13424 | SNTA1    |
| Q16143 | SNCB     |
| Q16572 | SLC18A3  |
| Q9UMX0 | UBQLN1   |
| Q05707 | COL14A1  |
| P33316 | DUT      |
| O14974 | PPP1R12A |
| P35475 | IDUA     |
| Q8WX93 | PALLD    |
| P28336 | NMBR     |
| O76070 | SNCG     |
| P62191 | PSMC1    |
| Q9NUD9 | PIGV     |
| O00142 | TK2      |
| P01266 | TG       |
| O75340 | PDCD6    |
| Q9H553 | ALG2     |
| Q01484 | ANK2     |
| P07451 | CA3      |
| P12829 | MYL4     |
| Q15049 | MLC1     |
| Q14872 | MTF1     |
| Q9Y4D1 | DAAM1    |
| P61916 | NPC2     |
| Q9Y5X1 | SNX9     |
| Q9Y2I1 | NISCH    |
| Q13835 | PKP1     |
| Q96QD8 | SLC38A2  |
| P62195 | PSMC5    |
| P17980 | PSMC3    |

|        |          |
|--------|----------|
| Q93096 | PTP4A1   |
| P29074 | PTPN4    |
| O14813 | PHOX2A   |
| P28072 | PSMB6    |
| Q8IWU6 | SULF1    |
| Q8WWN8 | ARAP3    |
| P56270 | MAZ      |
| P49802 | RGS7     |
| Q9UHL4 | DPP7     |
| Q86TI2 | DPP9     |
| P24387 | CRHBP    |
| P35998 | PSMC2    |
| Q92882 | OSTF1    |
| Q8TDQ7 | GNPDA2   |
| Q9H3P7 | ACBD3    |
| Q70SY1 | CREB3L2  |
| Q13505 | MTX1     |
| P05543 | SERPINA7 |
| Q8NBS9 | TXNDC5   |
| Q92777 | SYN2     |
| Q9UNK0 | STX8     |
| Q9HC07 | TMEM165  |
| Q9GZS3 | WDR61    |
| Q9Y468 | L3MBTL1  |
| Q8IYR6 | TMEFF1   |
| P53805 | RCAN1    |
| Q08554 | DSC1     |
| Q9BS86 | ZBPB     |
| Q9UHR4 | BAIAP2L1 |
| O94973 | AP2A2    |
| Q02410 | APBA1    |
| P57771 | RGS8     |
| Q9BPU6 | DPYSL5   |
| P57073 | SOX8     |
| Q96RF0 | SNX18    |
| Q9H3S5 | PIGM     |
| Q96CJ1 | EAF2     |
| Q4G0P3 | HYDIN    |
| O95273 | CCNDBP1  |
| Q16342 | PDCD2    |
| Q9NS69 | TOMM22   |
| Q13136 | PPFIA1   |
| Q5JY77 | GPRASP1  |

|            |            |
|------------|------------|
| Q8TCU3     | SLC7A13    |
| Q9HB20     | PLEKHA3    |
| Q86VD9     | PIGZ       |
| Q6EBC2     | IL31       |
| Q96HL8     | SH3YL1     |
| Q8N9U0     | TC2N       |
| Q6N075     | MFSD5      |
| Q9BRN9     | TM2D3      |
| L0R8F8     | MIEF1      |
| Q9NQG6     | MIEF1      |
| A2RRD8     | ZNF320     |
| Q9Y3D0     | CIAO2B     |
| A6NEK1     | ARRDC5     |
| Q9H714     | RUBCNL     |
| Q6NVV9     | ADAM5      |
| A4D0T7     | SMIM30     |
| Q9H0P7     | AGPAT4-IT1 |
| P17812     | CTPS1      |
| P23468     | PTPRD      |
| P0DJI8     | SAA1       |
| P24855     | DNASE1     |
| Q01538     | MYT1       |
| Q99640     | PKMYT1     |
| Q9UHA4     | LAMTOR3    |
| Q8IUK5     | PLXDC1     |
| P21964     | COMT       |
| P61764     | STXBP1     |
| Q92831     | KAT2B      |
| P35219     | CA8        |
| P50993     | ATP1A2     |
| P31994     | FCGR2B     |
| P22413     | ENPP1      |
| P15498     | VAV1       |
| Q02962     | PAX2       |
| Q9NP59     | SLC40A1    |
| A0A140G945 | CRYAA2     |
| P02489     | CRYAA      |
| Q07075     | ENPEP      |
| Q9GZV3     | SLC5A7     |
| Q9UP52     | TFR2       |
| O43516     | WIPF1      |
| P49407     | ARRB1      |
| Q12959     | DLG1       |

|        |          |
|--------|----------|
| P04440 | HLA-DPB1 |
| Q92956 | TNFRSF14 |
| O00629 | KPNA4    |
| P62253 | UBE2G1   |
| Q03060 | CREM     |
| O95665 | NTSR2    |
| O60896 | RAMP3    |
| P51784 | USP11    |
| Q9Y2M5 | KLHL20   |
| P35626 | GRK3     |
| Q6ZMG9 | CERS6    |
| Q08050 | FOXM1    |
| Q14168 | MPP2     |
| Q29RF7 | PDS5A    |
| P78395 | PRAME    |
| Q8IWT3 | CUL9     |
| Q6ZVN8 | HJV      |
| Q9P127 | LUZP4    |
| O43318 | MAP3K7   |
| Q12879 | GRIN2A   |
| P01019 | AGT      |
| O60566 | BUB1B    |
| P61244 | MAX      |
| P08172 | CHRM2    |
| P02458 | COL2A1   |
| P16471 | PRLR     |
| P12235 | SLC25A4  |
| Q01726 | MC1R     |
| P35221 | CTNNA1   |
| O43464 | HTRA2    |
| P49281 | SLC11A2  |
| P61077 | UBE2D3   |
| P32322 | PYCR1    |
| P52209 | PGD      |
| P20700 | LMNB1    |
| Q9UBM7 | DHCR7    |
| P08246 | ELANE    |
| P05177 | CYP1A2   |
| P25774 | CTSS     |
| P14222 | PRF1     |
| Q16512 | PKN1     |
| Q13885 | TUBB2A   |
| Q9UDY2 | TJP2     |

|        |          |
|--------|----------|
| P08238 | HSP90AB1 |
| P05413 | FABP3    |
| P49639 | HOXA1    |
| P25021 | HRH2     |
| P08697 | SERPINF2 |
| O75908 | SOAT2    |
| Q14994 | NR1I3    |
| P68371 | TUBB4B   |
| P23763 | VAMP1    |
| Q9P2W7 | B3GAT1   |
| P02788 | LTF      |
| Q9UQ84 | EXO1     |
| P49146 | NPY2R    |
| Q9UD71 | PPP1R1B  |
| Q92673 | SORL1    |
| Q9NYY3 | PLK2     |
| P48664 | SLC1A6   |
| Q11201 | ST3GAL1  |
| P22105 | TNXB     |
| P0CG48 | UBC      |
| O43593 | HR       |
| Q9UKL4 | GJD2     |
| Q92765 | FRZB     |
| P48382 | RFX5     |
| O95479 | H6PD     |
| Q8N465 | D2HGDH   |
| P32302 | CXCR5    |
| P62917 | RPL8     |
| O00592 | PODXL    |
| O00214 | LGALS8   |
| P46063 | RECQL    |
| Q9Y6F9 | WNT6     |
| P13236 | CCL4     |
| Q08211 | DHX9     |
| Q92813 | DIO2     |
| Q00013 | MPP1     |
| P25208 | NFYB     |
| Q9H9P8 | L2HGDH   |
| O00421 | CCRL2    |
| Q5T3J3 | LRIF1    |
| Q5UIP0 | RIF1     |
| Q9Y581 | INSL6    |
| Q969P0 | IGSF8    |

|        |         |
|--------|---------|
| Q9P2E9 | RRBP1   |
| Q99567 | NUP88   |
| Q9HB63 | NTN4    |
| Q92988 | DLX4    |
| O95716 | RAB3D   |
| Q96JK9 | MAML3   |
| E9PAV3 | NACA    |
| Q13765 | NACA    |
| O95049 | TJP3    |
| Q96PC5 | MIA2    |
| Q14392 | LRRC32  |
| Q9UKJ5 | CHIC2   |
| Q9UKY0 | PRND    |
| Q9NWB1 | RBFOX1  |
| Q96DZ5 | CLIP3   |
| O43164 | PJA2    |
| P81877 | SSBP2   |
| Q9H6H4 | REEP4   |
| Q96QS1 | TSPAN32 |
| Q15431 | SYCP1   |
| P54107 | CRISP1  |
| Q9UHD8 | SEPTIN9 |
| O75971 | SNAPC5  |
| Q8IU54 | IFNL1   |
| Q96AQ6 | PBXIP1  |
| O75324 | SNN     |
| Q9H0V1 | TMEM168 |
| Q6ICH7 | ASPHD2  |
| Q16517 | NNAT    |
| Q8IUR6 | CREBRF  |
| Q76B58 | BRINP3  |
| P62807 | H2BC4   |
| Q7Z5A7 | TAFA5   |
| P36888 | FLT3    |
| P41180 | CASR    |
| Q13285 | NR5A1   |
| P23284 | PPIB    |
| P07384 | CAPN1   |
| P21333 | FLNA    |
| O15357 | INPPL1  |
| Q9UHD2 | TBK1    |
| P00966 | ASS1    |
| Q15375 | EPHA7   |



|        |        |
|--------|--------|
| P20309 | CHRM3  |
| P43681 | CHRNA4 |
| P48058 | GRIA4  |
| Q9Y6K9 | IKBKG  |
| P07947 | YES1   |
| Q9UBS5 | GABBR1 |
| P17655 | CAPN2  |
| Q02078 | MEF2A  |
| O43684 | BUB3   |
| P02792 | FTL    |
| P20815 | CYP3A5 |
| P49427 | CDC34  |
| Q13002 | GRIK2  |
| P49674 | CSNK1E |
| P35498 | SCN1A  |
| P21817 | RYR1   |
| P12268 | IMPDH2 |
| Q05086 | UBE3A  |
| P07225 | PROS1  |
| P62834 | RAP1A  |
| P05787 | KRT8   |
| P02545 | LMNA   |
| Q06210 | GFPT1  |
| P18846 | ATF1   |
| P84077 | ARF1   |
| P08243 | ASNS   |
| P14867 | GABRA1 |
| P18507 | GABRG2 |
| P51610 | HCFC1  |
| P15882 | CHN1   |
| P21917 | DRD4   |
| Q9Y463 | DYRK1B |
| P15976 | GATA1  |
| P43354 | NR4A2  |
| P03952 | KLKB1  |
| P07288 | KLK3   |
| Q9UGN5 | PARP2  |
| P62873 | GNB1   |
| O00305 | CACNB4 |
| Q92633 | LPAR1  |
| P14324 | FDPS   |
| P42566 | EPS15  |
| O43184 | ADAM12 |

|        |         |
|--------|---------|
| P01023 | A2M     |
| P08173 | CHRM4   |
| Q16555 | DPYSL2  |
| Q05639 | EEF1A2  |
| P39086 | GRIK1   |
| P50213 | IDH3A   |
| Q9HAZ2 | PRDM16  |
| Q9H228 | S1PR5   |
| P60903 | S100A10 |
| O75582 | RPS6KA5 |
| P80365 | HSD11B2 |
| Q9H0K1 | SIK2    |
| P08476 | INHBA   |
| P25391 | LAMA1   |
| P04350 | TUBB4A  |
| P68036 | UBE2L3  |
| P19525 | EIF2AK2 |
| P29973 | CNGA1   |
| Q13148 | TARDBP  |
| Q04695 | KRT17   |
| P08727 | KRT19   |
| Q9Y2U5 | MAP3K2  |
| Q12955 | ANK3    |
| P43251 | BTD     |
| P34059 | GALNS   |
| P25440 | BRD2    |
| Q12802 | AKAP13  |
| P00387 | CYB5R3  |
| Q7Z449 | CYP2U1  |
| P08311 | CTSG    |
| P17927 | CR1     |
| P01040 | CSTA    |
| P52790 | HK3     |
| P17787 | CHRNA2  |
| P60842 | EIF4A1  |
| Q13562 | NEUROD1 |
| P42701 | IL12RB1 |
| P14678 | SNRPB   |
| Q07699 | SCN1B   |
| Q9P212 | PLCE1   |
| P43088 | PTGFR   |
| Q7Z6Z7 | HUWE1   |
| Q9Y4H2 | IRS2    |

|        |          |
|--------|----------|
| Q92995 | USP13    |
| Q96FE5 | LINGO1   |
| Q9UBU3 | GHRL     |
| O00757 | FBP2     |
| Q63HM2 | PCNX4    |
| P54803 | GALC     |
| Q96SW2 | CRBN     |
| O76039 | CDKL5    |
| Q14541 | HNF4G    |
| P50747 | HLCS     |
| O43665 | RGS10    |
| P01215 | CGA      |
| P58340 | MLF1     |
| Q9NRI5 | DISC1    |
| Q15075 | EEA1     |
| P63211 | GNGT1    |
| Q16099 | GRIK4    |
| Q16478 | GRIK5    |
| P12110 | COL6A2   |
| O15075 | DCLK1    |
| P23975 | SLC6A2   |
| Q7Z628 | NET1     |
| Q9Y345 | SLC6A5   |
| P41220 | RGS2     |
| Q15466 | NR0B2    |
| P48552 | NRIP1    |
| Q13228 | SELENBP1 |
| Q08752 | PPID     |
| Q92743 | HTRA1    |
| O43612 | HCRT     |
| P50336 | PPOX     |
| Q96RD7 | PANX1    |
| Q9HAU4 | SMURF2   |
| Q9H4B4 | PLK3     |
| P05111 | INHA     |
| Q9NZV8 | KCND2    |
| P01213 | PDYN     |
| P11161 | EGR2     |
| P61296 | HAND2    |
| P34931 | HSPA1L   |
| Q9Y263 | PLAA     |
| Q9UM63 | PLAGL1   |
| Q92794 | KAT6A    |

|        |          |
|--------|----------|
| Q15208 | STK38    |
| P19532 | TFE3     |
| Q9H0D6 | XRN2     |
| Q96QS3 | ARX      |
| O00358 | FOX E1   |
| P78347 | GTF2I    |
| Q16774 | GUK1     |
| Q92820 | GGH      |
| Q9P0U3 | SENP1    |
| Q13625 | TP53BP2  |
| P41227 | NAA10    |
| Q13617 | CUL2     |
| O75603 | GCM2     |
| Q6IB77 | GLYAT    |
| P33241 | LSP1     |
| O14867 | BACH1    |
| Q9BX63 | BRIP1    |
| Q9Y3I1 | FBXO7    |
| P09972 | ALDOC    |
| O75955 | FLOT1    |
| P41440 | SLC19A1  |
| Q9BZC7 | ABCA2    |
| Q11130 | FUT7     |
| O43927 | CXCL13   |
| Q9UBD6 | RHCG     |
| Q9NP71 | MLXIPL   |
| Q03591 | CFHR1    |
| Q9UJW3 | DNMT3L   |
| Q13368 | MPP3     |
| Q92796 | DLG3     |
| Q16531 | DDB1     |
| Q9UBF6 | RNF7     |
| Q15784 | NEUROD2  |
| Q13261 | IL15RA   |
| P55345 | PRMT2    |
| Q8N4C6 | NIN      |
| P62875 | POLR2L   |
| Q9BQE3 | TUBA1C   |
| Q9C035 | TRIM5    |
| P05162 | LGALS2   |
| Q92806 | KCNJ9    |
| P52306 | RAP1GDS1 |
| Q8NF91 | SYNE1    |

|        |         |
|--------|---------|
| P16519 | PCSK2   |
| Q8TDD2 | SP7     |
| O96004 | HAND1   |
| P04259 | KRT6B   |
| O95405 | ZFYVE9  |
| P35900 | KRT20   |
| Q92585 | MAML1   |
| O75891 | ALDH1L1 |
| O00219 | HAS3    |
| Q13421 | MSLN    |
| P55073 | DIO3    |
| Q02083 | NAAA    |
| O75461 | E2F6    |
| Q9H8S9 | MOB1A   |
| O15372 | EIF3H   |
| O15492 | RGS16   |
| Q15406 | NR6A1   |
| Q8N0W4 | NLGN4X  |
| Q96DU3 | SLAMF6  |
| Q9Y6M0 | PRSS21  |
| Q9H0F6 | SHARPIN |
| Q92886 | NEUROG1 |
| Q12800 | TFCP2   |
| Q01085 | TIAL1   |
| P24588 | AKAP5   |
| Q9UJ14 | GGT7    |
| Q9Y6D6 | ARFGEF1 |
| Q76L83 | ASXL2   |
| Q6PL18 | ATAD2   |
| Q9H2G9 | BLZF1   |
| O94911 | ABCA8   |
| Q9UJA2 | CRLS1   |
| P13378 | HOXD8   |
| P52951 | GBX2    |
| Q13319 | CDK5R2  |
| Q07092 | COL16A1 |
| P14866 | HNRNPL  |
| Q92839 | HAS1    |
| Q01658 | DR1     |
| P26378 | ELAVL4  |
| O14931 | NCR3    |
| Q96EB1 | ELP4    |
| O76081 | RGS20   |

|        |          |
|--------|----------|
| O75398 | DEAF1    |
| P16150 | SPN      |
| Q9NPD7 | NRN1     |
| P05000 | IFNW1    |
| Q9UG01 | IFT172   |
| Q9BST9 | RTKN     |
| Q9NYR9 | NKIRAS2  |
| Q99969 | RARRES2  |
| Q86U70 | LDB1     |
| Q9BXJ9 | NAA15    |
| Q8IXF0 | NPAS3    |
| P49685 | GPR15    |
| Q9NR30 | DDX21    |
| Q9NY93 | DDX56    |
| P55884 | EIF3B    |
| P60228 | EIF3E    |
| Q7Z6J0 | SH3RF1   |
| P56470 | LGALS4   |
| Q9Y4X4 | KLF12    |
| Q8NHU6 | TDRD7    |
| O60675 | MAFK     |
| O43513 | MED7     |
| Q16570 | ACKR1    |
| O00590 | ACKR2    |
| Q9BPY8 | HOPX     |
| Q9BZE4 | GTPBP4   |
| Q01850 | CDR2     |
| P15822 | HIVEP1   |
| Q9Y4C5 | CHST2    |
| Q9C005 | DPY30    |
| O15541 | RNF113A  |
| Q96JQ0 | DCHS1    |
| Q9H159 | CDH19    |
| P53618 | COPB1    |
| P01569 | IFNA5    |
| Q86UN2 | RTN4RL1  |
| Q9BV35 | SLC25A23 |
| Q96CW5 | TUBGCP3  |
| Q96Q89 | KIF20B   |
| Q99805 | TM9SF2   |
| O43692 | PI15     |
| Q9C075 | KRT23    |
| Q147X3 | NAA30    |

|        |          |
|--------|----------|
| O15457 | MSH4     |
| Q86UP3 | ZFHX4    |
| Q96KR1 | ZFR      |
| Q13503 | MED21    |
| Q8TF66 | LRRC15   |
| Q9H0B8 | CRISPLD2 |
| O43248 | HOXC11   |
| Q9Y222 | DMTF1    |
| Q8WXI7 | MUC16    |
| Q9Y3A3 | MOB4     |
| Q8TAT5 | NEIL3    |
| Q8TEC5 | SH3RF2   |
| P05013 | IFNA6    |
| Q86YD1 | PTOV1    |
| P50458 | LHX2     |
| Q9NYW7 | TAS2R1   |
| Q6UXB8 | PI16     |
| Q8IZJ0 | IFNL2    |
| Q9UF56 | FBXL17   |
| Q9C0F0 | ASXL3    |
| Q13686 | ALKBH1   |
| Q9NPB9 | ACKR4    |
| Q9Y5Q8 | GTF3C5   |
| Q58WW2 | DCAF6    |
| Q6ZMN7 | PDZRN4   |
| P01568 | IFNA21   |
| Q9HBI0 | PARVG    |
| Q86UN3 | RTN4RL2  |
| Q8IZD6 | SLC22A15 |
| Q07444 | KLRC3    |
| Q9BXU1 | STK31    |
| P17152 | TMEM11   |
| Q8IZI9 | IFNL3    |
| Q8IU57 | IFNLR1   |
| Q8WTV1 | THAP3    |
| Q9BRH9 | ZNF251   |
| Q96DT7 | ZBTB10   |
| Q7L311 | ARMCX2   |
| Q9H336 | CRISPLD1 |
| Q969V6 | MRTFA    |
| O60519 | CREBL2   |
| Q5M775 | SPECC1   |
| P05014 | IFNA4    |

|        |           |
|--------|-----------|
| P32881 | IFNA8     |
| P01566 | IFNA10    |
| Q96JJ6 | JPH4      |
| Q05215 | EGR4      |
| O95389 | CCN6      |
| Q9Y692 | GMEB1     |
| Q9UH62 | ARMCX3    |
| P0C7T5 | ATXN1L    |
| Q96LK0 | CEP19     |
| Q8WUJ3 | CEMIP     |
| Q9Y5L2 | HILPDA    |
| Q15369 | ELOC      |
| P01567 | IFNA7     |
| Q0D2I5 | IFFO1     |
| Q96FV3 | TSPAN17   |
| Q693B1 | KCTD11    |
| P01571 | IFNA17    |
| Q96GA3 | LTV1      |
| Q8N1E6 | FBXL14    |
| Q8N865 | C7orf31   |
| Q15370 | ELOB      |
| P01570 | IFNA14    |
| P05015 | IFNA16    |
| Q96FX7 | TRMT61A   |
| Q9UKQ9 | KLK9      |
| P16619 | CCL3L1    |
| O76076 | CCN5      |
| Q4G1C9 | GLIPR1L2  |
| Q9P291 | ARMCX1    |
| Q8NDZ0 | BEND2     |
| Q9BY89 | KIAA1671  |
| Q08117 | TLE5      |
| P13762 | HLA-DRB4  |
| Q92599 | SEPTIN8   |
| O15446 | POLR1G    |
| Q8TF63 | DCANP1    |
| A6NI86 | GOLGA6L10 |
| Q13072 | BAGE      |

**Table S3. Signaling pathways in KEGG enrichment analysis of glioma-related targets**

| ID | Description | pvalue |
|----|-------------|--------|
|----|-------------|--------|



|          |                                                          |          |
|----------|----------------------------------------------------------|----------|
| hsa04151 | PI3K-Akt signaling pathway                               | 9.99E-61 |
| hsa04015 | Rap1 signaling pathway                                   | 1.02E-39 |
| hsa04010 | MAPK signaling pathway                                   | 1.84E-36 |
| hsa04933 | AGE-RAGE signaling pathway in diabetic complications     | 3.44E-33 |
| hsa04014 | Ras signaling pathway                                    | 1.67E-30 |
| hsa04620 | Toll-like receptor signaling pathway                     | 1.23E-29 |
| hsa04012 | ErbB signaling pathway                                   | 1.71E-28 |
| hsa04722 | Neurotrophin signaling pathway                           | 1.09E-27 |
| hsa04630 | JAK-STAT signaling pathway                               | 1.62E-27 |
| hsa04062 | Chemokine signaling pathway                              | 2.76E-27 |
| hsa04668 | TNF signaling pathway                                    | 3.88E-25 |
| hsa04625 | C-type lectin receptor signaling pathway                 | 3.25E-23 |
| hsa04068 | FoxO signaling pathway                                   | 7.31E-23 |
| hsa04912 | GnRH signaling pathway                                   | 3.58E-22 |
| hsa04066 | HIF-1 signaling pathway                                  | 2.64E-21 |
| hsa04660 | T cell receptor signaling pathway                        | 1.87E-20 |
| hsa05235 | PD-L1 expression and PD-1 checkpoint pathway in cancer   | 9.66E-20 |
| hsa04024 | cAMP signaling pathway                                   | 1.29E-19 |
| hsa04926 | Relaxin signaling pathway                                | 4.04E-19 |
| hsa04917 | Prolactin signaling pathway                              | 7.38E-19 |
| hsa04657 | IL-17 signaling pathway                                  | 9.33E-19 |
| hsa04020 | Calcium signaling pathway                                | 2.30E-18 |
| hsa04915 | Estrogen signaling pathway                               | 2.32E-18 |
| hsa04071 | Sphingolipid signaling pathway                           | 3.58E-18 |
| hsa04621 | NOD-like receptor signaling pathway                      | 3.87E-18 |
| hsa04211 | Longevity regulating pathway                             | 4.85E-17 |
| hsa04213 | Longevity regulating pathway - multiple species          | 6.25E-17 |
| hsa04664 | Fc epsilon RI signaling pathway                          | 4.85E-16 |
| hsa04064 | NF-kappa B signaling pathway                             | 1.19E-15 |
| hsa04390 | Hippo signaling pathway                                  | 1.20E-15 |
| hsa04072 | Phospholipase D signaling pathway                        | 1.60E-15 |
| hsa04371 | Apelin signaling pathway                                 | 1.83E-15 |
| hsa04350 | TGF-beta signaling pathway                               | 1.83E-15 |
| hsa04115 | p53 signaling pathway                                    | 5.07E-15 |
| hsa04550 | Signaling pathways regulating pluripotency of stem cells | 9.84E-15 |
| hsa04310 | Wnt signaling pathway                                    | 1.08E-14 |
| hsa04910 | Insulin signaling pathway                                | 1.11E-13 |
| hsa04370 | VEGF signaling pathway                                   | 7.82E-13 |
| hsa04919 | Thyroid hormone signaling pathway                        | 8.41E-13 |
| hsa04022 | cGMP-PKG signaling pathway                               | 6.71E-12 |
| hsa04622 | RIG-I-like receptor signaling pathway                    | 1.44E-11 |
| hsa04921 | Oxytocin signaling pathway                               | 1.01E-10 |

|          |                                                   |          |
|----------|---------------------------------------------------|----------|
| hsa04150 | mTOR signaling pathway                            | 1.33E-09 |
| hsa05022 | Pathways of neurodegeneration - multiple diseases | 6.67E-09 |
| hsa04920 | Adipocytokine signaling pathway                   | 1.57E-08 |
| hsa04662 | B cell receptor signaling pathway                 | 5.09E-08 |
| hsa04152 | AMPK signaling pathway                            | 6.17E-08 |
| hsa05130 | Pathogenic Escherichia coli infection             | 9.98E-07 |
| hsa05414 | Dilated cardiomyopathy                            | 1.57E-06 |
| hsa04623 | Cytosolic DNA-sensing pathway                     | 8.21E-06 |
| hsa05410 | Hypertrophic cardiomyopathy                       | 0.000168 |
| hsa05412 | Arrhythmogenic right ventricular cardiomyopathy   | 0.000359 |
| hsa05415 | Diabetic cardiomyopathy                           | 0.000384 |
| hsa04330 | Notch signaling pathway                           | 0.000546 |
| hsa04340 | Hedgehog signaling pathway                        | 0.000919 |
| hsa04922 | Glucagon signaling pathway                        | 0.002313 |

## Table S4. Result of GO enrichment analysis

### Biological process

| ID         | Description                                  | LogP     |
|------------|----------------------------------------------|----------|
| GO:0010035 | response to inorganic substance              | -51.4694 |
| GO:0006979 | response to oxidative stress                 | -41.7269 |
| GO:0097190 | apoptotic signaling pathway                  | -40.6086 |
| GO:0009636 | response to toxic substance                  | -40.318  |
| GO:0034599 | cellular response to oxidative stress        | -38.5367 |
| GO:0000302 | response to reactive oxygen species          | -36.1625 |
| GO:0010942 | positive regulation of cell death            | -34.9653 |
| GO:0071407 | cellular response to organic cyclic compound | -34.4405 |
| GO:0010038 | response to metal ion                        | -34.3255 |
| GO:1901699 | cellular response to nitrogen compound       | -34.0321 |
| GO:1901652 | response to peptide                          | -33.4979 |

|                |                                                        |          |
|----------------|--------------------------------------------------------|----------|
| GO:00513<br>47 | positive regulation of transferase activity            | -33.1327 |
| GO:00713<br>96 | cellular response to lipid                             | -32.9785 |
| GO:00346<br>14 | cellular response to reactive oxygen species           | -32.0839 |
| GO:00096<br>11 | response to wounding                                   | -31.6759 |
| GO:00725<br>93 | reactive oxygen species metabolic process              | -31.5893 |
| GO:00712<br>41 | cellular response to inorganic substance               | -31.351  |
| GO:00336<br>74 | positive regulation of kinase activity                 | -31.0399 |
| GO:00709<br>97 | neuron death                                           | -30.7141 |
| GO:00714<br>17 | cellular response to organonitrogen compound           | -30.2748 |
| GO:00430<br>65 | positive regulation of apoptotic process               | -30.0645 |
| GO:00430<br>68 | positive regulation of programmed cell death           | -29.8179 |
| GO:00466<br>77 | response to antibiotic                                 | -29.6909 |
| GO:00324<br>96 | response to lipopolysaccharide                         | -29.3228 |
| GO:00303<br>35 | positive regulation of cell migration                  | -29.1178 |
| GO:00719<br>00 | regulation of protein serine/threonine kinase activity | -29.0829 |
| GO:00712<br>48 | cellular response to metal ion                         | -28.8839 |
| GO:00356<br>90 | cellular response to drug                              | -28.7306 |
| GO:20012<br>33 | regulation of apoptotic signaling pathway              | -28.5335 |
| GO:00022<br>37 | response to molecule of bacterial origin               | -28.3591 |
| GO:20001<br>47 | positive regulation of cell motility                   | -28.3352 |
| GO:00182<br>09 | peptidyl-serine modification                           | -28.0928 |
| GO:00181<br>05 | peptidyl-serine phosphorylation                        | -27.854  |

|            |                                                                 |          |  |
|------------|-----------------------------------------------------------------|----------|--|
| GO:0051272 | positive regulation of cellular component movement              | -27.8157 |  |
| GO:0040017 | positive regulation of locomotion                               | -27.5346 |  |
| GO:0048732 | gland development                                               | -27.3986 |  |
| GO:0045860 | positive regulation of protein kinase activity                  | -26.5444 |  |
| GO:0071902 | positive regulation of protein serine/threonine kinase activity | -26.21   |  |
| GO:0007568 | aging                                                           | -26.1821 |  |
| GO:0043410 | positive regulation of MAPK cascade                             | -26.1028 |  |
| GO:1901214 | regulation of neuron death                                      | -26.096  |  |
| GO:0071216 | cellular response to biotic stimulus                            | -25.7531 |  |
| GO:0030155 | regulation of cell adhesion                                     | -25.5956 |  |
| GO:0048608 | reproductive structure development                              | -25.0777 |  |
| GO:0042060 | wound healing                                                   | -25.0686 |  |
| GO:0071363 | cellular response to growth factor stimulus                     | -25.0242 |  |
| GO:0061458 | reproductive system development                                 | -24.9463 |  |
| GO:0070848 | response to growth factor                                       | -24.333  |  |
| GO:0001568 | blood vessel development                                        | -24.3322 |  |
| GO:0097237 | cellular response to toxic substance                            | -24.2388 |  |
| GO:0009617 | response to bacterium                                           | -24.2209 |  |
| GO:2000377 | regulation of reactive oxygen species metabolic process         | -24.2169 |  |
| GO:0009991 | response to extracellular stimulus                              | -24.1556 |  |
| GO:2001234 | negative regulation of apoptotic signaling pathway              | -23.777  |  |
| GO:0080135 | regulation of cellular response to stress                       | -23.6944 |  |

|                |                                                                  |          |
|----------------|------------------------------------------------------------------|----------|
| GO:00466<br>86 | response to cadmium ion                                          | -23.3374 |
| GO:00025<br>21 | leukocyte differentiation                                        | -23.3315 |
| GO:00506<br>73 | epithelial cell proliferation                                    | -23.2873 |
| GO:00330<br>02 | muscle cell proliferation                                        | -23.2338 |
| GO:00514<br>02 | neuron apoptotic process                                         | -23.1858 |
| GO:00434<br>08 | regulation of MAPK cascade                                       | -23.1449 |
| GO:00328<br>70 | cellular response to hormone stimulus                            | -22.901  |
| GO:00181<br>08 | peptidyl-tyrosine phosphorylation                                | -22.8069 |
| GO:00182<br>12 | peptidyl-tyrosine modification                                   | -22.7031 |
| GO:00011<br>01 | response to acid chemical                                        | -22.6362 |
| GO:00971<br>93 | intrinsic apoptotic signaling pathway                            | -22.4439 |
| GO:00712<br>22 | cellular response to lipopolysaccharide                          | -22.4267 |
| GO:00071<br>69 | transmembrane receptor protein tyrosine kinase signaling pathway | -22.2768 |
| GO:00434<br>06 | positive regulation of MAP kinase activity                       | -22.1815 |
| GO:00316<br>67 | response to nutrient levels                                      | -21.8571 |
| GO:00506<br>78 | regulation of epithelial cell proliferation                      | -21.8083 |
| GO:00224<br>07 | regulation of cell-cell adhesion                                 | -21.8053 |
| GO:00712<br>19 | cellular response to molecule of bacterial origin                | -21.7146 |
| GO:00434<br>34 | response to peptide hormone                                      | -21.5675 |
| GO:00485<br>45 | response to steroid hormone                                      | -21.4317 |
| GO:00971<br>91 | extrinsic apoptotic signaling pathway                            | -21.3299 |
| GO:00714<br>96 | cellular response to external stimulus                           | -21.2578 |

|            |                                                                  |          |
|------------|------------------------------------------------------------------|----------|
| GO:0001819 | positive regulation of cytokine production                       | -21.1626 |
| GO:2000379 | positive regulation of reactive oxygen species metabolic process | -20.5312 |
| GO:0009314 | response to radiation                                            | -20.5137 |
| GO:0043491 | protein kinase B signaling                                       | -20.4953 |
| GO:0003006 | developmental process involved in reproduction                   | -20.4133 |
| GO:0048514 | blood vessel morphogenesis                                       | -20.3509 |
| GO:0043405 | regulation of MAP kinase activity                                | -20.3159 |
| GO:0048660 | regulation of smooth muscle cell proliferation                   | -20.3123 |
| GO:0009410 | response to xenobiotic stimulus                                  | -20.2201 |
| GO:0048659 | smooth muscle cell proliferation                                 | -20.2008 |
| GO:0001666 | response to hypoxia                                              | -19.9181 |
| GO:0070482 | response to oxygen levels                                        | -19.868  |
| GO:0010638 | positive regulation of organelle organization                    | -19.8457 |
| GO:0032147 | activation of protein kinase activity                            | -19.7168 |
| GO:0050900 | leukocyte migration                                              | -19.6967 |
| GO:0051098 | regulation of binding                                            | -19.6294 |
| GO:0036293 | response to decreased oxygen levels                              | -19.5349 |
| GO:0032103 | positive regulation of response to external stimulus             | -19.4469 |
| GO:0048511 | rhythmic process                                                 | -19.438  |
| GO:0042063 | gliogenesis                                                      | -19.4023 |
| GO:0051090 | regulation of DNA-binding transcription factor activity          | -19.2575 |
| GO:0050727 | regulation of inflammatory response                              | -19.1593 |

|            |                                                                     |          |
|------------|---------------------------------------------------------------------|----------|
| GO:0045785 | positive regulation of cell adhesion                                | -18.9401 |
| GO:1901654 | response to ketone                                                  | -18.9156 |
| GO:1903409 | reactive oxygen species biosynthetic process                        | -18.9006 |
| GO:1904645 | response to amyloid-beta                                            | -18.7771 |
| GO:0008285 | negative regulation of cell proliferation                           | -18.7755 |
| GO:0050865 | regulation of cell activation                                       | -18.6105 |
| GO:0062012 | regulation of small molecule metabolic process                      | -18.5795 |
| GO:0002573 | myeloid leukocyte differentiation                                   | -18.4061 |
| GO:0062013 | positive regulation of small molecule metabolic process             | -18.3457 |
| GO:0043523 | regulation of neuron apoptotic process                              | -18.2722 |
| GO:0071276 | cellular response to cadmium ion                                    | -18.2623 |
| GO:1901216 | positive regulation of neuron death                                 | -18.2383 |
| GO:1902895 | positive regulation of pri-miRNA transcription by RNA polymerase II | -17.9211 |
| GO:0070201 | regulation of establishment of protein localization                 | -17.7775 |
| GO:0002064 | epithelial cell development                                         | -17.7572 |
| GO:0030099 | myeloid cell differentiation                                        | -17.756  |
| GO:0051046 | regulation of secretion                                             | -17.6083 |
| GO:0001525 | angiogenesis                                                        | -17.5829 |
| GO:1901653 | cellular response to peptide                                        | -17.5441 |
| GO:1904951 | positive regulation of establishment of protein localization        | -17.5167 |
| GO:2001237 | negative regulation of extrinsic apoptotic signaling pathway        | -17.4777 |
| GO:0032787 | monocarboxylic acid metabolic process                               | -17.4545 |

|                |                                                            |          |
|----------------|------------------------------------------------------------|----------|
| GO:00973<br>05 | response to alcohol                                        | -17.3906 |
| GO:00467<br>77 | protein autophosphorylation                                | -17.3112 |
| GO:00455<br>96 | negative regulation of cell differentiation                | -17.2708 |
| GO:00488<br>71 | multicellular organismal homeostasis                       | -17.2534 |
| GO:00098<br>96 | positive regulation of catabolic process                   | -17.2433 |
| GO:00001<br>87 | activation of MAPK activity                                | -17.1779 |
| GO:00900<br>87 | regulation of peptide transport                            | -17.1662 |
| GO:19038<br>27 | regulation of cellular protein localization                | -17.0097 |
| GO:00316<br>68 | cellular response to extracellular stimulus                | -16.8279 |
| GO:00323<br>55 | response to estradiol                                      | -16.7191 |
| GO:00518<br>96 | regulation of protein kinase B signaling                   | -16.7024 |
| GO:19040<br>19 | epithelial cell apoptotic process                          | -16.6008 |
| GO:00071<br>59 | leukocyte cell-cell adhesion                               | -16.4877 |
| GO:00466<br>49 | lymphocyte activation                                      | -16.4781 |
| GO:19030<br>37 | regulation of leukocyte cell-cell adhesion                 | -16.4334 |
| GO:00106<br>31 | epithelial cell migration                                  | -16.4316 |
| GO:00100<br>01 | glial cell differentiation                                 | -16.3926 |
| GO:00901<br>32 | epithelium migration                                       | -16.3481 |
| GO:00486<br>61 | positive regulation of smooth muscle cell proliferation    | -16.3138 |
| GO:19028<br>93 | regulation of pri-miRNA transcription by RNA polymerase II | -16.232  |
| GO:00106<br>34 | positive regulation of epithelial cell migration           | -16.1859 |
| GO:00901<br>30 | tissue migration                                           | -16.1834 |



|                |                                                          |          |
|----------------|----------------------------------------------------------|----------|
| GO:19038<br>29 | positive regulation of cellular protein localization     | -16.1665 |
| GO:19037<br>06 | regulation of hemopoiesis                                | -16.134  |
| GO:00457<br>86 | negative regulation of cell cycle                        | -16.1204 |
| GO:00616<br>14 | pri-miRNA transcription by RNA polymerase II             | -16.1126 |
| GO:00019<br>35 | endothelial cell proliferation                           | -16.1117 |
| GO:00506<br>79 | positive regulation of epithelial cell proliferation     | -15.9484 |
| GO:00105<br>06 | regulation of autophagy                                  | -15.8791 |
| GO:00224<br>09 | positive regulation of cell-cell adhesion                | -15.8    |
| GO:00706<br>61 | leukocyte proliferation                                  | -15.7998 |
| GO:00313<br>31 | positive regulation of cellular catabolic process        | -15.7844 |
| GO:00508<br>78 | regulation of body fluid levels                          | -15.7836 |
| GO:00463<br>94 | carboxylic acid biosynthetic process                     | -15.7013 |
| GO:00160<br>53 | organic acid biosynthetic process                        | -15.6787 |
| GO:00319<br>60 | response to corticosteroid                               | -15.5298 |
| GO:00181<br>07 | peptidyl-threonine phosphorylation                       | -15.4001 |
| GO:00507<br>31 | positive regulation of peptidyl-tyrosine phosphorylation | -15.3949 |
| GO:19030<br>34 | regulation of response to wounding                       | -15.3121 |
| GO:00464<br>25 | regulation of JAK-STAT cascade                           | -15.2833 |
| GO:19040<br>35 | regulation of epithelial cell apoptotic process          | -15.2244 |
| GO:00507<br>30 | regulation of peptidyl-tyrosine phosphorylation          | -15.2078 |
| GO:19035<br>30 | regulation of secretion by cell                          | -15.1454 |
| GO:00425<br>42 | response to hydrogen peroxide                            | -15.1291 |

|                |                                                                                  |          |
|----------------|----------------------------------------------------------------------------------|----------|
| GO:00458<br>62 | positive regulation of proteolysis                                               | -15.0448 |
| GO:00305<br>22 | intracellular receptor signaling pathway                                         | -15.043  |
| GO:00512<br>23 | regulation of protein transport                                                  | -15.0388 |
| GO:19040<br>18 | positive regulation of vasculature development                                   | -15.0364 |
| GO:00712<br>36 | cellular response to antibiotic                                                  | -14.9785 |
| GO:00518<br>97 | positive regulation of protein kinase B signaling                                | -14.8939 |
| GO:00182<br>10 | peptidyl-threonine modification                                                  | -14.8753 |
| GO:00512<br>49 | regulation of lymphocyte activation                                              | -14.8583 |
| GO:20003<br>51 | regulation of endothelial cell apoptotic process                                 | -14.8555 |
| GO:00096<br>12 | response to mechanical stimulus                                                  | -14.8343 |
| GO:19048<br>92 | regulation of STAT cascade                                                       | -14.8312 |
| GO:00603<br>26 | cell chemotaxis                                                                  | -14.7824 |
| GO:00027<br>91 | regulation of peptide secretion                                                  | -14.7082 |
| GO:00723<br>30 | monocarboxylic acid biosynthetic process                                         | -14.6966 |
| GO:00073<br>46 | regulation of mitotic cell cycle                                                 | -14.6358 |
| GO:00313<br>49 | positive regulation of defense response                                          | -14.5936 |
| GO:00016<br>67 | ameboidal-type cell migration                                                    | -14.5867 |
| GO:00602<br>49 | anatomical structure homeostasis                                                 | -14.5712 |
| GO:00094<br>16 | response to light stimulus                                                       | -14.554  |
| GO:00432<br>81 | regulation of cysteine-type endopeptidase activity involved in apoptotic process | -14.4957 |
| GO:00316<br>69 | cellular response to nutrient levels                                             | -14.4847 |
| GO:19013<br>42 | regulation of vasculature development                                            | -14.4364 |

|                |                                                                  |          |         |
|----------------|------------------------------------------------------------------|----------|---------|
| GO:00725<br>77 | endothelial cell apoptotic process                               | -14.4084 |         |
| GO:00026<br>83 | negative regulation of immune system process                     | -14.3971 |         |
| GO:00512<br>22 | positive regulation of protein transport                         | -14.3848 |         |
| GO:20012<br>36 | regulation of extrinsic apoptotic signaling pathway              | -14.3626 |         |
| GO:00019<br>36 | regulation of endothelial cell proliferation                     | -14.3517 |         |
| GO:00400<br>08 | regulation of growth                                             | -14.3317 |         |
| GO:00313<br>34 | positive regulation of protein complex assembly                  | -14.327  |         |
| GO:19021<br>05 | regulation of leukocyte differentiation                          | -14.2974 |         |
| GO:00610<br>41 | regulation of wound healing                                      | -14.2284 |         |
| GO:00094<br>11 | response to UV                                                   | -14.0876 |         |
| GO:00511<br>86 | cofactor metabolic process                                       | -14.0763 |         |
| GO:00069<br>35 | chemotaxis                                                       | -14.0258 |         |
| GO:00432<br>69 | regulation of ion transport                                      | -14.0207 |         |
| GO:00511<br>00 | negative regulation of binding                                   | -14.0105 |         |
| GO:00106<br>32 | regulation of epithelial cell migration                          | -14.0069 |         |
| GO:00030<br>13 | circulatory system process                                       | -13.9921 |         |
| GO:00423<br>30 | taxis                                                            |          | -13.992 |
| GO:00026<br>94 | regulation of leukocyte activation                               | -13.9871 |         |
| GO:00070<br>50 | cell cycle arrest                                                | -13.8969 |         |
| GO:00510<br>91 | positive regulation of DNA-binding transcription factor activity | -13.8789 |         |
| GO:00316<br>63 | lipopolysaccharide-mediated signaling pathway                    | -13.8466 |         |
| GO:00066<br>90 | icosanoid metabolic process                                      | -13.7635 |         |

|                |                                                                         |          |
|----------------|-------------------------------------------------------------------------|----------|
| GO:19037<br>08 | positive regulation of hemopoiesis                                      | -13.7385 |
| GO:00706<br>63 | regulation of leukocyte proliferation                                   | -13.7301 |
| GO:00713<br>83 | cellular response to steroid hormone stimulus                           | -13.702  |
| GO:00345<br>04 | protein localization to nucleus                                         | -13.6678 |
| GO:20001<br>16 | regulation of cysteine-type endopeptidase activity                      | -13.6644 |
| GO:00435<br>36 | positive regulation of blood vessel endothelial cell migration          | -13.614  |
| GO:19001<br>82 | positive regulation of protein localization to nucleus                  | -13.614  |
| GO:00705<br>55 | response to interleukin-1                                               | -13.5935 |
| GO:00000<br>79 | regulation of cyclin-dependent protein serine/threonine kinase activity | -13.5602 |
| GO:00456<br>39 | positive regulation of myeloid cell differentiation                     | -13.5602 |
| GO:19028<br>82 | regulation of response to oxidative stress                              | -13.5602 |
| GO:19012<br>15 | negative regulation of neuron death                                     | -13.5578 |
| GO:00714<br>66 | cellular response to xenobiotic stimulus                                | -13.5556 |
| GO:00346<br>12 | response to tumor necrosis factor                                       | -13.5107 |
| GO:19001<br>80 | regulation of protein localization to nucleus                           | -13.4997 |
| GO:00069<br>14 | autophagy                                                               | -13.4688 |
| GO:00619<br>19 | process utilizing autophagic mechanism                                  | -13.4688 |
| GO:00328<br>68 | response to insulin                                                     | -13.4338 |
| GO:00507<br>08 | regulation of protein secretion                                         | -13.4247 |
| GO:00432<br>54 | regulation of protein complex assembly                                  | -13.3688 |
| GO:00018<br>90 | placenta development                                                    | -13.3445 |
| GO:19040<br>29 | regulation of cyclin-dependent protein kinase activity                  | -13.3214 |

|                |                                                                         |          |
|----------------|-------------------------------------------------------------------------|----------|
| GO:00080<br>15 | blood circulation                                                       | -13.3018 |
| GO:00108<br>17 | regulation of hormone levels                                            | -13.2652 |
| GO:00421<br>36 | neurotransmitter biosynthetic process                                   | -13.2058 |
| GO:00082<br>02 | steroid metabolic process                                               | -13.1972 |
| GO:00703<br>71 | ERK1 and ERK2 cascade                                                   | -13.1972 |
| GO:00510<br>47 | positive regulation of secretion                                        | -13.1651 |
| GO:00420<br>35 | regulation of cytokine biosynthetic process                             | -13.1398 |
| GO:00072<br>59 | JAK-STAT cascade                                                        | -13.1296 |
| GO:00075<br>65 | female pregnancy                                                        | -12.9828 |
| GO:00421<br>08 | positive regulation of cytokine biosynthetic process                    | -12.9818 |
| GO:00456<br>37 | regulation of myeloid cell differentiation                              | -12.9803 |
| GO:20012<br>42 | regulation of intrinsic apoptotic signaling pathway                     | -12.9629 |
| GO:00432<br>00 | response to amino acid                                                  | -12.8727 |
| GO:00464<br>27 | positive regulation of JAK-STAT cascade                                 | -12.8604 |
| GO:00192<br>16 | regulation of lipid metabolic process                                   | -12.8575 |
| GO:00310<br>99 | regeneration                                                            | -12.8027 |
| GO:19051<br>14 | cell surface receptor signaling pathway involved in cell-cell signaling | -12.8    |
| GO:19004<br>07 | regulation of cellular response to oxidative stress                     | -12.797  |
| GO:19030<br>39 | positive regulation of leukocyte cell-cell adhesion                     | -12.7838 |
| GO:00308<br>79 | mammary gland development                                               | -12.7732 |
| GO:00420<br>89 | cytokine biosynthetic process                                           | -12.7451 |
| GO:00976<br>96 | STAT cascade                                                            | -12.7212 |

|                |                                                          |          |
|----------------|----------------------------------------------------------|----------|
| GO:19025<br>32 | negative regulation of intracellular signal transduction | -12.7162 |
| GO:00421<br>10 | T cell activation                                        | -12.7115 |
| GO:19048<br>94 | positive regulation of STAT cascade                      | -12.6725 |
| GO:00421<br>07 | cytokine metabolic process                               | -12.6699 |
| GO:00457<br>87 | positive regulation of cell cycle                        | -12.664  |
| GO:00466<br>60 | female sex differentiation                               | -12.6098 |
| GO:00030<br>18 | vascular process in circulatory system                   | -12.6038 |
| GO:19015<br>68 | fatty acid derivative metabolic process                  | -12.6038 |
| GO:00165<br>72 | histone phosphorylation                                  | -12.6038 |
| GO:00068<br>01 | superoxide metabolic process                             | -12.5959 |
| GO:00987<br>71 | inorganic ion homeostasis                                | -12.5727 |
| GO:00457<br>66 | positive regulation of angiogenesis                      | -12.5589 |
| GO:00513<br>84 | response to glucocorticoid                               | -12.5499 |
| GO:00510<br>54 | positive regulation of DNA metabolic process             | -12.5345 |
| GO:00075<br>48 | sex differentiation                                      | -12.4945 |
| GO:00712<br>29 | cellular response to acid chemical                       | -12.4909 |
| GO:00424<br>45 | hormone metabolic process                                | -12.4736 |
| GO:00433<br>93 | regulation of protein binding                            | -12.4237 |
| GO:00140<br>74 | response to purine-containing compound                   | -12.42   |
| GO:00466<br>51 | lymphocyte proliferation                                 | -12.4123 |
| GO:00027<br>61 | regulation of myeloid leukocyte differentiation          | -12.4082 |
| GO:00015<br>05 | regulation of neurotransmitter levels                    | -12.3979 |

|                |                                                            |          |
|----------------|------------------------------------------------------------|----------|
| GO:00606<br>27 | regulation of vesicle-mediated transport                   | -12.3871 |
| GO:00027<br>63 | positive regulation of myeloid leukocyte differentiation   | -12.3789 |
| GO:00193<br>69 | arachidonic acid metabolic process                         | -12.3789 |
| GO:00487<br>71 | tissue remodeling                                          | -12.3385 |
| GO:00329<br>43 | mononuclear cell proliferation                             | -12.331  |
| GO:00435<br>42 | endothelial cell migration                                 | -12.331  |
| GO:00086<br>37 | apoptotic mitochondrial changes                            | -12.3102 |
| GO:00458<br>34 | positive regulation of lipid metabolic process             | -12.293  |
| GO:00459<br>81 | positive regulation of nucleotide metabolic process        | -12.292  |
| GO:19005<br>44 | positive regulation of purine nucleotide metabolic process | -12.292  |
| GO:00027<br>90 | peptide secretion                                          | -12.2831 |
| GO:19016<br>15 | organic hydroxy compound metabolic process                 | -12.2831 |
| GO:00140<br>65 | phosphatidylinositol 3-kinase signaling                    | -12.2512 |
| GO:00068<br>09 | nitric oxide biosynthetic process                          | -12.2417 |
| GO:00140<br>66 | regulation of phosphatidylinositol 3-kinase signaling      | -12.2138 |
| GO:00713<br>75 | cellular response to peptide hormone stimulus              | -12.1948 |
| GO:00075<br>84 | response to nutrient                                       | -12.1939 |
| GO:00712<br>14 | cellular response to abiotic stimulus                      | -12.1706 |
| GO:01040<br>04 | cellular response to environmental stimulus                | -12.1706 |
| GO:00421<br>33 | neurotransmitter metabolic process                         | -12.1687 |
| GO:00725<br>94 | establishment of protein localization to organelle         | -12.1633 |
| GO:00488<br>72 | homeostasis of number of cells                             | -12.1197 |

|            |                                                       |          |
|------------|-------------------------------------------------------|----------|
| GO:0045080 | positive regulation of chemokine biosynthetic process | -12.1066 |
| GO:0043534 | blood vessel endothelial cell migration               | -12.0491 |
| GO:0030168 | platelet activation                                   | -12.047  |
| GO:0008610 | lipid biosynthetic process                            | -12.0045 |
| GO:0044706 | multi-multicellular organism process                  | -11.9722 |
| GO:1902107 | positive regulation of leukocyte differentiation      | -11.9674 |
| GO:0031098 | stress-activated protein kinase signaling cascade     | -11.9387 |
| GO:0010595 | positive regulation of endothelial cell migration     | -11.9347 |
| GO:0098754 | detoxification                                        | -11.9347 |
| GO:0046209 | nitric oxide metabolic process                        | -11.9118 |
| GO:0007596 | blood coagulation                                     | -11.9104 |
| GO:1905475 | regulation of protein localization to membrane        | -11.875  |
| GO:0046683 | response to organophosphorus                          | -11.8448 |
| GO:0007599 | hemostasis                                            | -11.7953 |
| GO:0050817 | coagulation                                           | -11.7725 |
| GO:0009615 | response to virus                                     | -11.7498 |
| GO:1904646 | cellular response to amyloid-beta                     | -11.7385 |
| GO:0009743 | response to carbohydrate                              | -11.7282 |
| GO:2001057 | reactive nitrogen species metabolic process           | -11.7243 |
| GO:0070372 | regulation of ERK1 and ERK2 cascade                   | -11.6893 |
| GO:0032102 | negative regulation of response to external stimulus  | -11.6779 |
| GO:0001938 | positive regulation of endothelial cell proliferation | -11.6199 |



|                |                                                                  |          |
|----------------|------------------------------------------------------------------|----------|
| GO:00086<br>25 | extrinsic apoptotic signaling pathway via death domain receptors | -11.6033 |
| GO:19907<br>48 | cellular detoxification                                          | -11.5701 |
| GO:00457<br>65 | regulation of angiogenesis                                       | -11.5545 |
| GO:00425<br>94 | response to starvation                                           | -11.5092 |
| GO:00481<br>46 | positive regulation of fibroblast proliferation                  | -11.4559 |
| GO:00714<br>56 | cellular response to hypoxia                                     | -11.445  |
| GO:00432<br>70 | positive regulation of ion transport                             | -11.3879 |
| GO:00335<br>59 | unsaturated fatty acid metabolic process                         | -11.3756 |
| GO:00381<br>27 | ERBB signaling pathway                                           | -11.3755 |
| GO:00015<br>03 | ossification                                                     | -11.3733 |
| GO:00070<br>05 | mitochondrion organization                                       | -11.3647 |
| GO:00485<br>89 | developmental growth                                             | -11.3162 |
| GO:00026<br>85 | regulation of leukocyte migration                                | -11.2876 |
| GO:00514<br>03 | stress-activated MAPK cascade                                    | -11.2862 |
| GO:00440<br>89 | positive regulation of cellular component biogenesis             | -11.2838 |
| GO:00093<br>06 | protein secretion                                                | -11.2323 |
| GO:00508<br>63 | regulation of T cell activation                                  | -11.217  |
| GO:00525<br>47 | regulation of peptidase activity                                 | -11.2074 |
| GO:00450<br>73 | regulation of chemokine biosynthetic process                     | -11.2048 |
| GO:00519<br>24 | regulation of calcium ion transport                              | -11.1846 |
| GO:00019<br>59 | regulation of cytokine-mediated signaling pathway                | -11.158  |
| GO:20012<br>35 | positive regulation of apoptotic signaling pathway               | -11.158  |

|                |                                                              |          |
|----------------|--------------------------------------------------------------|----------|
| GO:19016<br>55 | cellular response to ketone                                  | -11.1479 |
| GO:00454<br>71 | response to ethanol                                          | -11.1427 |
| GO:00550<br>80 | cation homeostasis                                           | -11.1394 |
| GO:00362<br>94 | cellular response to decreased oxygen levels                 | -11.1344 |
| GO:00703<br>74 | positive regulation of ERK1 and ERK2 cascade                 | -11.1042 |
| GO:00364<br>73 | cell death in response to oxidative stress                   | -11.094  |
| GO:20012<br>43 | negative regulation of intrinsic apoptotic signaling pathway | -11.094  |
| GO:00311<br>00 | animal organ regeneration                                    | -11.0932 |
| GO:00380<br>34 | signal transduction in absence of ligand                     | -11.0932 |
| GO:00971<br>92 | extrinsic apoptotic signaling pathway in absence of ligand   | -11.0932 |
| GO:00713<br>56 | cellular response to tumor necrosis factor                   | -11.0633 |
| GO:00226<br>12 | gland morphogenesis                                          | -11.0524 |
| GO:00459<br>30 | negative regulation of mitotic cell cycle                    | -11.0151 |
| GO:00725<br>11 | divalent inorganic cation transport                          | -10.9935 |
| GO:00085<br>85 | female gonad development                                     | -10.9879 |
| GO:00084<br>06 | gonad development                                            | -10.9851 |
| GO:00071<br>62 | negative regulation of cell adhesion                         | -10.9667 |
| GO:01500<br>76 | neuroinflammatory response                                   | -10.9639 |
| GO:19032<br>01 | regulation of oxidative stress-induced cell death            | -10.9639 |
| GO:00420<br>33 | chemokine biosynthetic process                               | -10.9577 |
| GO:00507<br>55 | chemokine metabolic process                                  | -10.9577 |
| GO:00975<br>29 | myeloid leukocyte migration                                  | -10.9557 |

|                |                                                                 |          |
|----------------|-----------------------------------------------------------------|----------|
| GO:00900<br>68 | positive regulation of cell cycle process                       | -10.9428 |
| GO:00525<br>48 | regulation of endopeptidase activity                            | -10.9117 |
| GO:00480<br>15 | phosphatidylinositol-mediated signaling                         | -10.8579 |
| GO:00027<br>93 | positive regulation of peptide secretion                        | -10.8395 |
| GO:00086<br>30 | intrinsic apoptotic signaling pathway in response to DNA damage | -10.8331 |
| GO:00988<br>69 | cellular oxidant detoxification                                 | -10.8331 |
| GO:00510<br>92 | positive regulation of NF-kappaB transcription factor activity  | -10.8325 |
| GO:00451<br>37 | development of primary sexual characteristics                   | -10.8108 |
| GO:00109<br>59 | regulation of metal ion transport                               | -10.7987 |
| GO:00723<br>31 | signal transduction by p53 class mediator                       | -10.7873 |
| GO:00435<br>25 | positive regulation of neuron apoptotic process                 | -10.7863 |
| GO:00421<br>76 | regulation of protein catabolic process                         | -10.779  |
| GO:00465<br>45 | development of primary female sexual characteristics            | -10.7327 |
| GO:00480<br>17 | inositol lipid-mediated signaling                               | -10.7296 |
| GO:00607<br>59 | regulation of response to cytokine stimulus                     | -10.7296 |
| GO:00092<br>67 | cellular response to starvation                                 | -10.723  |
| GO:00305<br>95 | leukocyte chemotaxis                                            | -10.6975 |
| GO:00459<br>36 | negative regulation of phosphate metabolic process              | -10.6809 |
| GO:00092<br>66 | response to temperature stimulus                                | -10.6695 |
| GO:00105<br>63 | negative regulation of phosphorus metabolic process             | -10.6661 |
| GO:00435<br>35 | regulation of blood vessel endothelial cell migration           | -10.6513 |
| GO:19013<br>61 | organic cyclic compound catabolic process                       | -10.6446 |

|                |                                                            |          |
|----------------|------------------------------------------------------------|----------|
| GO:00714<br>53 | cellular response to oxygen levels                         | -10.6417 |
| GO:00327<br>22 | positive regulation of chemokine production                | -10.6348 |
| GO:19034<br>26 | regulation of reactive oxygen species biosynthetic process | -10.6344 |
| GO:00508<br>04 | modulation of chemical synaptic transmission               | -10.6025 |
| GO:00481<br>45 | regulation of fibroblast proliferation                     | -10.5974 |
| GO:00487<br>08 | astrocyte differentiation                                  | -10.5974 |
| GO:00718<br>87 | leukocyte apoptotic process                                | -10.586  |
| GO:00991<br>77 | regulation of trans-synaptic signaling                     | -10.5847 |
| GO:00513<br>45 | positive regulation of hydrolase activity                  | -10.5692 |
| GO:00459<br>31 | positive regulation of mitotic cell cycle                  | -10.5456 |
| GO:00481<br>44 | fibroblast proliferation                                   | -10.5392 |
| GO:00105<br>94 | regulation of endothelial cell migration                   | -10.5316 |
| GO:00105<br>64 | regulation of cell cycle process                           | -10.4698 |
| GO:00300<br>98 | lymphocyte differentiation                                 | -10.4444 |
| GO:00068<br>73 | cellular ion homeostasis                                   | -10.433  |
| GO:00031<br>58 | endothelium development                                    | -10.4232 |
| GO:00507<br>14 | positive regulation of protein secretion                   | -10.3914 |
| GO:00018<br>89 | liver development                                          | -10.384  |
| GO:00450<br>55 | regulated exocytosis                                       | -10.3839 |
| GO:19047<br>05 | regulation of vascular smooth muscle cell proliferation    | -10.3692 |
| GO:19908<br>74 | vascular smooth muscle cell proliferation                  | -10.3692 |
| GO:00342<br>84 | response to monosaccharide                                 | -10.3617 |

|            |                                                                                  |          |
|------------|----------------------------------------------------------------------------------|----------|
| GO:0001676 | long-chain fatty acid metabolic process                                          | -10.3514 |
| GO:0042113 | B cell activation                                                                | -10.3511 |
| GO:0007249 | I-kappaB kinase/NF-kappaB signaling                                              | -10.3429 |
| GO:0002697 | regulation of immune effector process                                            | -10.3237 |
| GO:0014068 | positive regulation of phosphatidylinositol 3-kinase signaling                   | -10.314  |
| GO:0032642 | regulation of chemokine production                                               | -10.314  |
| GO:0045737 | positive regulation of cyclin-dependent protein serine/threonine kinase activity | -10.3078 |
| GO:0035296 | regulation of tube diameter                                                      | -10.3064 |
| GO:0050880 | regulation of blood vessel size                                                  | -10.3064 |
| GO:0097746 | regulation of blood vessel diameter                                              | -10.3064 |
| GO:0006109 | regulation of carbohydrate metabolic process                                     | -10.3027 |
| GO:0034764 | positive regulation of transmembrane transport                                   | -10.3027 |
| GO:0035150 | regulation of tube size                                                          | -10.2681 |
| GO:0061008 | hepaticobiliary system development                                               | -10.2681 |
| GO:0043620 | regulation of DNA-templated transcription in response to stress                  | -10.2608 |
| GO:0002764 | immune response-regulating signaling pathway                                     | -10.2584 |
| GO:0070838 | divalent metal ion transport                                                     | -10.2389 |
| GO:0002700 | regulation of production of molecular mediator of immune response                | -10.2301 |
| GO:0030810 | positive regulation of nucleotide biosynthetic process                           | -10.1771 |
| GO:1900373 | positive regulation of purine nucleotide biosynthetic process                    | -10.1771 |
| GO:1903580 | positive regulation of ATP metabolic process                                     | -10.1771 |
| GO:0034976 | response to endoplasmic reticulum stress                                         | -10.1555 |

|                |                                                                 |          |
|----------------|-----------------------------------------------------------------|----------|
| GO:19005<br>42 | regulation of purine nucleotide metabolic process               | -10.1178 |
| GO:00435<br>24 | negative regulation of neuron apoptotic process                 | -10.0809 |
| GO:00076<br>23 | circadian rhythm                                                | -10.073  |
| GO:19035<br>32 | positive regulation of secretion by cell                        | -10.0546 |
| GO:00713<br>47 | cellular response to interleukin-1                              | -10.0469 |
| GO:00506<br>70 | regulation of lymphocyte proliferation                          | -10.045  |
| GO:00426<br>98 | ovulation cycle                                                 | -10.0163 |
| GO:19040<br>36 | negative regulation of epithelial cell apoptotic process        | -10.0082 |
| GO:00329<br>44 | regulation of mononuclear cell proliferation                    | -9.98935 |
| GO:00061<br>40 | regulation of nucleotide metabolic process                      | -9.97194 |
| GO:00427<br>59 | long-chain fatty acid biosynthetic process                      | -9.95392 |
| GO:00326<br>02 | chemokine production                                            | -9.94602 |
| GO:00511<br>29 | negative regulation of cellular component organization          | -9.92985 |
| GO:00069<br>84 | ER-nucleus signaling pathway                                    | -9.92664 |
| GO:00447<br>72 | mitotic cell cycle phase transition                             | -9.91465 |
| GO:00066<br>31 | fatty acid metabolic process                                    | -9.90209 |
| GO:00067<br>21 | terpenoid metabolic process                                     | -9.87372 |
| GO:00511<br>01 | regulation of DNA binding                                       | -9.87372 |
| GO:00421<br>00 | B cell proliferation                                            | -9.84643 |
| GO:00022<br>63 | cell activation involved in immune response                     | -9.84526 |
| GO:19040<br>31 | positive regulation of cyclin-dependent protein kinase activity | -9.84394 |
| GO:00300<br>03 | cellular cation homeostasis                                     | -9.84001 |

|                |                                                                                      |          |
|----------------|--------------------------------------------------------------------------------------|----------|
| GO:00448<br>43 | cell cycle G1/S phase transition                                                     | -9.79793 |
| GO:00303<br>16 | osteoclast differentiation                                                           | -9.79748 |
| GO:00510<br>52 | regulation of DNA metabolic process                                                  | -9.79481 |
| GO:00487<br>29 | tissue morphogenesis                                                                 | -9.78729 |
| GO:00020<br>09 | morphogenesis of an epithelium                                                       | -9.77194 |
| GO:00518<br>81 | regulation of mitochondrial membrane potential                                       | -9.7694  |
| GO:00344<br>05 | response to fluid shear stress                                                       | -9.73751 |
| GO:20003<br>52 | negative regulation of endothelial cell apoptotic process                            | -9.73751 |
| GO:00140<br>13 | regulation of gliogenesis                                                            | -9.71165 |
| GO:00985<br>42 | defense response to other organism                                                   | -9.70553 |
| GO:00703<br>01 | cellular response to hydrogen peroxide                                               | -9.70125 |
| GO:00108<br>21 | regulation of mitochondrion organization                                             | -9.68013 |
| GO:00430<br>62 | extracellular structure organization                                                 | -9.67751 |
| GO:00704<br>23 | nucleotide-binding oligomerization domain containing signaling pathway               | -9.63443 |
| GO:00434<br>67 | regulation of generation of precursor metabolites and energy                         | -9.62543 |
| GO:00995<br>36 | synaptic signaling                                                                   | -9.61058 |
| GO:00431<br>12 | receptor metabolic process                                                           | -9.53477 |
| GO:00358<br>72 | nucleotide-binding domain, leucine rich repeat containing receptor signaling pathway | -9.53449 |
| GO:00224<br>11 | cellular component disassembly                                                       | -9.52608 |
| GO:00160<br>55 | Wnt signaling pathway                                                                | -9.52053 |
| GO:00432<br>79 | response to alkaloid                                                                 | -9.51508 |
| GO:00060<br>91 | generation of precursor metabolites and energy                                       | -9.49035 |

|                |                                                                                         |          |
|----------------|-----------------------------------------------------------------------------------------|----------|
| GO:01987<br>38 | cell-cell signaling by wnt                                                              | -9.49035 |
| GO:00347<br>54 | cellular hormone metabolic process                                                      | -9.47888 |
| GO:00094<br>08 | response to heat                                                                        | -9.46109 |
| GO:00508<br>67 | positive regulation of cell activation                                                  | -9.45468 |
| GO:00097<br>46 | response to hexose                                                                      | -9.44952 |
| GO:00192<br>33 | sensory perception of pain                                                              | -9.42496 |
| GO:00068<br>16 | calcium ion transport                                                                   | -9.36897 |
| GO:00016<br>55 | urogenital system development                                                           | -9.35976 |
| GO:00000<br>82 | G1/S transition of mitotic cell cycle                                                   | -9.35515 |
| GO:00508<br>66 | negative regulation of cell activation                                                  | -9.33805 |
| GO:00301<br>00 | regulation of endocytosis                                                               | -9.3331  |
| GO:00464<br>56 | icosanoid biosynthetic process                                                          | -9.3326  |
| GO:00447<br>70 | cell cycle phase transition                                                             | -9.3054  |
| GO:00436<br>18 | regulation of transcription from RNA polymerase II promoter in response to stress       | -9.29329 |
| GO:00066<br>33 | fatty acid biosynthetic process                                                         | -9.27105 |
| GO:00977<br>55 | positive regulation of blood vessel diameter                                            | -9.26476 |
| GO:19034<br>28 | positive regulation of reactive oxygen species biosynthetic process                     | -9.26476 |
| GO:00423<br>26 | negative regulation of phosphorylation                                                  | -9.25986 |
| GO:00380<br>83 | peptidyl-tyrosine autophosphorylation                                                   | -9.25177 |
| GO:19020<br>42 | negative regulation of extrinsic apoptotic signaling pathway via death domain receptors | -9.25177 |
| GO:00016<br>59 | temperature homeostasis                                                                 | -9.2401  |
| GO:00459<br>13 | positive regulation of carbohydrate metabolic process                                   | -9.21225 |



|            |                                                                                           |          |
|------------|-------------------------------------------------------------------------------------------|----------|
| GO:0055065 | metal ion homeostasis                                                                     | -9.17708 |
| GO:0043154 | negative regulation of cysteine-type endopeptidase activity involved in apoptotic process | -9.16065 |
| GO:0002366 | leukocyte activation involved in immune response                                          | -9.15952 |
| GO:0007254 | JNK cascade                                                                               | -9.14875 |
| GO:0071384 | cellular response to corticosteroid stimulus                                              | -9.1328  |
| GO:0051301 | cell division                                                                             | -9.12652 |
| GO:0006720 | isoprenoid metabolic process                                                              | -9.11577 |
| GO:0050921 | positive regulation of chemotaxis                                                         | -9.11577 |
| GO:0001776 | leukocyte homeostasis                                                                     | -9.10972 |
| GO:0042446 | hormone biosynthetic process                                                              | -9.10972 |
| GO:1902175 | regulation of oxidative stress-induced intrinsic apoptotic signaling pathway              | -9.09729 |
| GO:0007268 | chemical synaptic transmission                                                            | -9.08786 |
| GO:0098916 | anterograde trans-synaptic signaling                                                      | -9.08786 |
| GO:0008631 | intrinsic apoptotic signaling pathway in response to oxidative stress                     | -9.07605 |
| GO:0032386 | regulation of intracellular transport                                                     | -9.07006 |
| GO:0044270 | cellular nitrogen compound catabolic process                                              | -9.0405  |
| GO:0030198 | extracellular matrix organization                                                         | -9.01353 |
| GO:0051493 | regulation of cytoskeleton organization                                                   | -9.01178 |
| GO:0060135 | maternal process involved in female pregnancy                                             | -9.00552 |
| GO:0099537 | trans-synaptic signaling                                                                  | -8.99347 |
| GO:0001892 | embryonic placenta development                                                            | -8.91241 |
| GO:20000   | regulation of G1/S transition of mitotic cell cycle                                       | -8.9124  |

|            |                                                             |          |
|------------|-------------------------------------------------------------|----------|
| 45         |                                                             |          |
| GO:0070665 | positive regulation of leukocyte proliferation              | -8.91125 |
| GO:0045429 | positive regulation of nitric oxide biosynthetic process    | -8.90933 |
| GO:0002253 | activation of immune response                               | -8.90036 |
| GO:0072521 | purine-containing compound metabolic process                | -8.87733 |
| GO:0051251 | positive regulation of lymphocyte activation                | -8.86021 |
| GO:0002696 | positive regulation of leukocyte activation                 | -8.85943 |
| GO:0038061 | NIK/NF-kappaB signaling                                     | -8.85519 |
| GO:0061061 | muscle structure development                                | -8.85451 |
| GO:0016999 | antibiotic metabolic process                                | -8.84512 |
| GO:1900371 | regulation of purine nucleotide biosynthetic process        | -8.84299 |
| GO:0045732 | positive regulation of protein catabolic process            | -8.84013 |
| GO:0045088 | regulation of innate immune response                        | -8.83183 |
| GO:1904407 | positive regulation of nitric oxide metabolic process       | -8.82908 |
| GO:0044057 | regulation of system process                                | -8.82607 |
| GO:0030808 | regulation of nucleotide biosynthetic process               | -8.80436 |
| GO:0032869 | cellular response to insulin stimulus                       | -8.79052 |
| GO:2000117 | negative regulation of cysteine-type endopeptidase activity | -8.77074 |
| GO:0021782 | glial cell development                                      | -8.76609 |
| GO:0045446 | endothelial cell differentiation                            | -8.76609 |
| GO:0050920 | regulation of chemotaxis                                    | -8.7659  |
| GO:0045428 | regulation of nitric oxide biosynthetic process             | -8.76378 |

|                |                                                               |          |
|----------------|---------------------------------------------------------------|----------|
| GO:19043<br>75 | regulation of protein localization to cell periphery          | -8.72817 |
| GO:00018<br>94 | tissue homeostasis                                            | -8.71702 |
| GO:00347<br>62 | regulation of transmembrane transport                         | -8.71162 |
| GO:00900<br>66 | regulation of anatomical structure size                       | -8.70997 |
| GO:00018<br>85 | endothelial cell development                                  | -8.70583 |
| GO:00027<br>53 | cytoplasmic pattern recognition receptor signaling pathway    | -8.70583 |
| GO:20005<br>73 | positive regulation of DNA biosynthetic process               | -8.70583 |
| GO:00904<br>07 | organophosphate biosynthetic process                          | -8.69892 |
| GO:00071<br>73 | epidermal growth factor receptor signaling pathway            | -8.69059 |
| GO:00515<br>91 | response to cAMP                                              | -8.6791  |
| GO:00309<br>68 | endoplasmic reticulum unfolded protein response               | -8.65335 |
| GO:19035<br>78 | regulation of ATP metabolic process                           | -8.65335 |
| GO:00314<br>00 | negative regulation of protein modification process           | -8.63739 |
| GO:00018<br>18 | negative regulation of cytokine production                    | -8.62623 |
| GO:00611<br>80 | mammary gland epithelium development                          | -8.59267 |
| GO:19054<br>77 | positive regulation of protein localization to membrane       | -8.57986 |
| GO:00097<br>49 | response to glucose                                           | -8.55248 |
| GO:00480<br>10 | vascular endothelial growth factor receptor signaling pathway | -8.54559 |
| GO:00082<br>10 | estrogen metabolic process                                    | -8.53209 |
| GO:00381<br>28 | ERBB2 signaling pathway                                       | -8.53209 |
| GO:00717<br>15 | icosanoid transport                                           | -8.52661 |
| GO:19015<br>71 | fatty acid derivative transport                               | -8.52661 |

|                |                                                                  |          |
|----------------|------------------------------------------------------------------|----------|
| GO:19047<br>07 | positive regulation of vascular smooth muscle cell proliferation | -8.52661 |
| GO:00603<br>59 | response to ammonium ion                                         | -8.50766 |
| GO:00328<br>72 | regulation of stress-activated MAPK cascade                      | -8.50296 |
| GO:00973<br>27 | response to antineoplastic agent                                 | -8.5021  |
| GO:00718<br>97 | DNA biosynthetic process                                         | -8.4995  |
| GO:00726<br>57 | protein localization to membrane                                 | -8.47826 |
| GO:00060<br>66 | alcohol metabolic process                                        | -8.46988 |
| GO:00091<br>17 | nucleotide metabolic process                                     | -8.45515 |
| GO:00027<br>57 | immune response-activating signal transduction                   | -8.4421  |
| GO:00703<br>02 | regulation of stress-activated protein kinase signaling cascade  | -8.43364 |
| GO:00069<br>09 | phagocytosis                                                     | -8.41873 |
| GO:00326<br>37 | interleukin-8 production                                         | -8.41657 |
| GO:00359<br>24 | cellular response to vascular endothelial growth factor stimulus | -8.37666 |
| GO:00067<br>53 | nucleoside phosphate metabolic process                           | -8.37589 |
| GO:19030<br>76 | regulation of protein localization to plasma membrane            | -8.37451 |
| GO:00017<br>01 | in utero embryonic development                                   | -8.36807 |
| GO:00427<br>70 | signal transduction in response to DNA damage                    | -8.36695 |
| GO:19028<br>06 | regulation of cell cycle G1/S phase transition                   | -8.34412 |
| GO:00425<br>93 | glucose homeostasis                                              | -8.34275 |
| GO:00467<br>00 | heterocycle catabolic process                                    | -8.34221 |
| GO:00091<br>65 | nucleotide biosynthetic process                                  | -8.33455 |
| GO:19015<br>70 | fatty acid derivative biosynthetic process                       | -8.33291 |

|            |                                                     |          |          |
|------------|-----------------------------------------------------|----------|----------|
| GO:0033500 | carbohydrate homeostasis                            | -8.32029 |          |
| GO:0046890 | regulation of lipid biosynthetic process            | -8.31873 |          |
| GO:0045089 | positive regulation of innate immune response       | -8.31787 |          |
| GO:0061756 | leukocyte adhesion to vascular endothelial cell     | -8.31706 |          |
| GO:0007610 | behavior                                            |          | -8.29932 |
| GO:0010042 | response to manganese ion                           | -8.29246 |          |
| GO:0032635 | interleukin-6 production                            | -8.29075 |          |
| GO:1901293 | nucleoside phosphate biosynthetic process           | -8.28466 |          |
| GO:0044070 | regulation of anion transport                       | -8.25105 |          |
| GO:0001933 | negative regulation of protein phosphorylation      | -8.25102 |          |
| GO:0032757 | positive regulation of interleukin-8 production     | -8.25014 |          |
| GO:0051194 | positive regulation of cofactor metabolic process   | -8.2396  |          |
| GO:0030856 | regulation of epithelial cell differentiation       | -8.23328 |          |
| GO:0050806 | positive regulation of synaptic transmission        | -8.23328 |          |
| GO:0043122 | regulation of I-kappaB kinase/NF-kappaB signaling   | -8.23149 |          |
| GO:0071156 | regulation of cell cycle arrest                     | -8.21077 |          |
| GO:0019439 | aromatic compound catabolic process                 | -8.19831 |          |
| GO:0009145 | purine nucleoside triphosphate biosynthetic process | -8.17657 |          |
| GO:0051099 | positive regulation of binding                      | -8.17657 |          |
| GO:0032091 | negative regulation of protein binding              | -8.17091 |          |
| GO:0036499 | PERK-mediated unfolded protein response             | -8.14898 |          |
| GO:00105   | regulation of platelet activation                   | -8.14838 |          |

|            |                                                               |          |
|------------|---------------------------------------------------------------|----------|
| 43         |                                                               |          |
| GO:0010332 | response to gamma radiation                                   | -8.12037 |
| GO:0033138 | positive regulation of peptidyl-serine phosphorylation        | -8.09243 |
| GO:0061045 | negative regulation of wound healing                          | -8.07562 |
| GO:0019932 | second-messenger-mediated signaling                           | -8.0718  |
| GO:0002687 | positive regulation of leukocyte migration                    | -8.06702 |
| GO:0048638 | regulation of developmental growth                            | -8.06507 |
| GO:0006164 | purine nucleotide biosynthetic process                        | -8.065   |
| GO:0090218 | positive regulation of lipid kinase activity                  | -8.06    |
| GO:1904994 | regulation of leukocyte adhesion to vascular endothelial cell | -8.06    |
| GO:2001171 | positive regulation of ATP biosynthetic process               | -8.06    |
| GO:0051607 | defense response to virus                                     | -8.05868 |
| GO:0042743 | hydrogen peroxide metabolic process                           | -8.05741 |
| GO:0010720 | positive regulation of cell development                       | -8.05095 |
| GO:0046886 | positive regulation of hormone biosynthetic process           | -8.04866 |
| GO:0005975 | carbohydrate metabolic process                                | -8.03118 |
| GO:0030193 | regulation of blood coagulation                               | -8.02787 |
| GO:0002440 | production of molecular mediator of immune response           | -8.00806 |
| GO:1901617 | organic hydroxy compound biosynthetic process                 | -7.99547 |
| GO:0071277 | cellular response to calcium ion                              | -7.98076 |
| GO:1900046 | regulation of hemostasis                                      | -7.98076 |
| GO:0032885 | regulation of polysaccharide biosynthetic process             | -7.97427 |

|                |                                                                                |          |
|----------------|--------------------------------------------------------------------------------|----------|
| GO:00102<br>12 | response to ionizing radiation                                                 | -7.97177 |
| GO:00331<br>35 | regulation of peptidyl-serine phosphorylation                                  | -7.97177 |
| GO:00713<br>46 | cellular response to interferon-gamma                                          | -7.9569  |
| GO:00346<br>20 | cellular response to unfolded protein                                          | -7.94051 |
| GO:00713<br>85 | cellular response to glucocorticoid stimulus                                   | -7.93511 |
| GO:19049<br>96 | positive regulation of leukocyte adhesion to vascular endothelial cell         | -7.8847  |
| GO:00515<br>92 | response to calcium ion                                                        | -7.87872 |
| GO:00091<br>68 | purine ribonucleoside monophosphate biosynthetic process                       | -7.87734 |
| GO:00018<br>36 | release of cytochrome c from mitochondria                                      | -7.87568 |
| GO:00619<br>00 | glial cell activation                                                          | -7.87568 |
| GO:00313<br>48 | negative regulation of defense response                                        | -7.87151 |
| GO:00725<br>22 | purine-containing compound biosynthetic process                                | -7.85937 |
| GO:00068<br>75 | cellular metal ion homeostasis                                                 | -7.85077 |
| GO:00069<br>70 | response to osmotic stress                                                     | -7.84315 |
| GO:00061<br>63 | purine nucleotide metabolic process                                            | -7.82623 |
| GO:00091<br>27 | purine nucleoside monophosphate biosynthetic process                           | -7.82511 |
| GO:00066<br>06 | protein import into nucleus                                                    | -7.81786 |
| GO:00336<br>19 | membrane protein proteolysis                                                   | -7.81734 |
| GO:19020<br>41 | regulation of extrinsic apoptotic signaling pathway via death domain receptors | -7.81734 |
| GO:00070<br>77 | mitotic nuclear envelope disassembly                                           | -7.81717 |
| GO:00718<br>03 | positive regulation of podosome assembly                                       | -7.81717 |
| GO:00431<br>23 | positive regulation of I-kappaB kinase/NF-kappaB signaling                     | -7.79923 |

|            |                                                                         |          |
|------------|-------------------------------------------------------------------------|----------|
| GO:0051341 | regulation of oxidoreductase activity                                   | -7.79387 |
| GO:0097530 | granulocyte migration                                                   | -7.78778 |
| GO:0051188 | cofactor biosynthetic process                                           | -7.76868 |
| GO:0002719 | negative regulation of cytokine production involved in immune response  | -7.76242 |
| GO:0045821 | positive regulation of glycolytic process                               | -7.76242 |
| GO:1902993 | positive regulation of amyloid precursor protein catabolic process      | -7.76242 |
| GO:0002260 | lymphocyte homeostasis                                                  | -7.76007 |
| GO:0030888 | regulation of B cell proliferation                                      | -7.76007 |
| GO:0032755 | positive regulation of interleukin-6 production                         | -7.75435 |
| GO:0050818 | regulation of coagulation                                               | -7.75435 |
| GO:0090559 | regulation of membrane permeability                                     | -7.75435 |
| GO:0009142 | nucleoside triphosphate biosynthetic process                            | -7.74795 |
| GO:0022408 | negative regulation of cell-cell adhesion                               | -7.72254 |
| GO:0045807 | positive regulation of endocytosis                                      | -7.69885 |
| GO:0009895 | negative regulation of catabolic process                                | -7.69731 |
| GO:0010822 | positive regulation of mitochondrion organization                       | -7.68776 |
| GO:0030111 | regulation of Wnt signaling pathway                                     | -7.68106 |
| GO:0043900 | regulation of multi-organism process                                    | -7.67514 |
| GO:0070542 | response to fatty acid                                                  | -7.66777 |
| GO:0051193 | regulation of cofactor metabolic process                                | -7.65305 |
| GO:0070920 | regulation of production of small RNA involved in gene silencing by RNA | -7.64588 |
| GO:0050864 | regulation of B cell activation                                         | -7.6224  |



|                |                                                              |          |
|----------------|--------------------------------------------------------------|----------|
| GO:00326<br>12 | interleukin-1 production                                     | -7.61866 |
| GO:00519<br>28 | positive regulation of calcium ion transport                 | -7.61866 |
| GO:00507<br>28 | negative regulation of inflammatory response                 | -7.59773 |
| GO:00327<br>68 | regulation of monooxygenase activity                         | -7.59421 |
| GO:00341<br>03 | regulation of tissue remodeling                              | -7.58331 |
| GO:19058<br>97 | regulation of response to endoplasmic reticulum stress       | -7.58331 |
| GO:00466<br>88 | response to copper ion                                       | -7.58061 |
| GO:00516<br>03 | proteolysis involved in cellular protein catabolic process   | -7.55875 |
| GO:00326<br>75 | regulation of interleukin-6 production                       | -7.55492 |
| GO:00507<br>77 | negative regulation of immune response                       | -7.55492 |
| GO:00066<br>94 | steroid biosynthetic process                                 | -7.54882 |
| GO:00326<br>77 | regulation of interleukin-8 production                       | -7.54184 |
| GO:00468<br>24 | positive regulation of nucleocytoplasmic transport           | -7.54081 |
| GO:00194<br>30 | removal of superoxide radicals                               | -7.53459 |
| GO:00308<br>13 | positive regulation of nucleotide catabolic process          | -7.53459 |
| GO:00511<br>97 | positive regulation of coenzyme metabolic process            | -7.53459 |
| GO:00091<br>56 | ribonucleoside monophosphate biosynthetic process            | -7.52458 |
| GO:00328<br>81 | regulation of polysaccharide metabolic process               | -7.50804 |
| GO:00328<br>90 | regulation of organic acid transport                         | -7.48831 |
| GO:00435<br>50 | regulation of lipid kinase activity                          | -7.48831 |
| GO:00456<br>70 | regulation of osteoclast differentiation                     | -7.48831 |
| GO:20001<br>34 | negative regulation of G1/S transition of mitotic cell cycle | -7.4842  |

|                |                                                         |          |
|----------------|---------------------------------------------------------|----------|
| GO:00423<br>91 | regulation of membrane potential                        | -7.47247 |
| GO:00067<br>54 | ATP biosynthetic process                                | -7.471   |
| GO:00343<br>41 | response to interferon-gamma                            | -7.45268 |
| GO:00716<br>21 | granulocyte chemotaxis                                  | -7.45134 |
| GO:00140<br>02 | astrocyte development                                   | -7.43731 |
| GO:00309<br>00 | forebrain development                                   | -7.43013 |
| GO:00456<br>72 | positive regulation of osteoclast differentiation       | -7.42809 |
| GO:00468<br>85 | regulation of hormone biosynthetic process              | -7.42809 |
| GO:00481<br>43 | astrocyte activation                                    | -7.42809 |
| GO:19030<br>35 | negative regulation of response to wounding             | -7.42037 |
| GO:00105<br>08 | positive regulation of autophagy                        | -7.41876 |
| GO:00109<br>52 | positive regulation of peptidase activity               | -7.40543 |
| GO:19019<br>90 | regulation of mitotic cell cycle phase transition       | -7.40197 |
| GO:00107<br>21 | negative regulation of cell development                 | -7.38858 |
| GO:00025<br>76 | platelet degranulation                                  | -7.38647 |
| GO:00026<br>37 | regulation of immunoglobulin production                 | -7.38587 |
| GO:00486<br>62 | negative regulation of smooth muscle cell proliferation | -7.38587 |
| GO:00009<br>04 | cell morphogenesis involved in differentiation          | -7.38444 |
| GO:00160<br>98 | monoterpenoid metabolic process                         | -7.38285 |
| GO:00022<br>21 | pattern recognition receptor signaling pathway          | -7.382   |
| GO:00157<br>11 | organic anion transport                                 | -7.36957 |
| GO:00507<br>68 | negative regulation of neurogenesis                     | -7.36935 |

|            |                                                         |          |
|------------|---------------------------------------------------------|----------|
| GO:0007093 | mitotic cell cycle checkpoint                           | -7.36181 |
| GO:0035967 | cellular response to topologically incorrect protein    | -7.36181 |
| GO:2001169 | regulation of ATP biosynthetic process                  | -7.34172 |
| GO:0071695 | anatomical structure maturation                         | -7.33498 |
| GO:0051348 | negative regulation of transferase activity             | -7.33289 |
| GO:0032770 | positive regulation of monooxygenase activity           | -7.32601 |
| GO:0071450 | cellular response to oxygen radical                     | -7.32601 |
| GO:0071451 | cellular response to superoxide                         | -7.32601 |
| GO:0019218 | regulation of steroid metabolic process                 | -7.32273 |
| GO:0051271 | negative regulation of cellular component movement      | -7.30925 |
| GO:0002819 | regulation of adaptive immune response                  | -7.30834 |
| GO:0009167 | purine ribonucleoside monophosphate metabolic process   | -7.30622 |
| GO:0043255 | regulation of carbohydrate biosynthetic process         | -7.30306 |
| GO:0050810 | regulation of steroid biosynthetic process              | -7.30306 |
| GO:0022602 | ovulation cycle process                                 | -7.30095 |
| GO:0030225 | macrophage differentiation                              | -7.30095 |
| GO:0042572 | retinol metabolic process                               | -7.30095 |
| GO:1902807 | negative regulation of cell cycle G1/S phase transition | -7.29126 |
| GO:0009124 | nucleoside monophosphate biosynthetic process           | -7.28959 |
| GO:0042982 | amyloid precursor protein metabolic process             | -7.28668 |
| GO:0030336 | negative regulation of cell migration                   | -7.27368 |
| GO:0009126 | purine nucleoside monophosphate metabolic process       | -7.25749 |

|            |                                                                 |          |
|------------|-----------------------------------------------------------------|----------|
| GO:0016125 | sterol metabolic process                                        | -7.25558 |
| GO:0034349 | glial cell apoptotic process                                    | -7.24611 |
| GO:0042531 | positive regulation of tyrosine phosphorylation of STAT protein | -7.23825 |
| GO:0034248 | regulation of cellular amide metabolic process                  | -7.22947 |
| GO:0051170 | import into nucleus                                             | -7.22947 |
| GO:0001782 | B cell homeostasis                                              | -7.22798 |
| GO:0042116 | macrophage activation                                           | -7.22705 |
| GO:0071560 | cellular response to transforming growth factor beta stimulus   | -7.22265 |
| GO:0006511 | ubiquitin-dependent protein catabolic process                   | -7.22263 |
| GO:0051966 | regulation of synaptic transmission, glutamatergic              | -7.19055 |
| GO:0009206 | purine ribonucleoside triphosphate biosynthetic process         | -7.17776 |
| GO:0032680 | regulation of tumor necrosis factor production                  | -7.17776 |
| GO:0050870 | positive regulation of T cell activation                        | -7.1769  |
| GO:0002758 | innate immune response-activating signal transduction           | -7.17234 |
| GO:0030850 | prostate gland development                                      | -7.17093 |
| GO:0042149 | cellular response to glucose starvation                         | -7.17093 |
| GO:0019941 | modification-dependent protein catabolic process                | -7.15699 |
| GO:0000303 | response to superoxide                                          | -7.13372 |
| GO:0035666 | TRIF-dependent toll-like receptor signaling pathway             | -7.13372 |
| GO:0060055 | angiogenesis involved in wound healing                          | -7.13372 |
| GO:0040013 | negative regulation of locomotion                               | -7.1333  |
| GO:0031589 | cell-substrate adhesion                                         | -7.11422 |

|            |                                                                          |          |
|------------|--------------------------------------------------------------------------|----------|
| GO:0001961 | positive regulation of cytokine-mediated signaling pathway               | -7.10812 |
| GO:0042987 | amyloid precursor protein catabolic process                              | -7.10812 |
| GO:0071559 | response to transforming growth factor beta                              | -7.10536 |
| GO:0016241 | regulation of macroautophagy                                             | -7.10146 |
| GO:1903555 | regulation of tumor necrosis factor superfamily cytokine production      | -7.10146 |
| GO:0046323 | glucose import                                                           | -7.09731 |
| GO:0019372 | lipxygenase pathway                                                      | -7.08597 |
| GO:0030397 | membrane disassembly                                                     | -7.08597 |
| GO:0032352 | positive regulation of hormone metabolic process                         | -7.08597 |
| GO:0051081 | nuclear envelope disassembly                                             | -7.08597 |
| GO:0071801 | regulation of podosome assembly                                          | -7.08597 |
| GO:0009161 | ribonucleoside monophosphate metabolic process                           | -7.08297 |
| GO:0002367 | cytokine production involved in immune response                          | -7.07994 |
| GO:0009135 | purine nucleoside diphosphate metabolic process                          | -7.07829 |
| GO:0009179 | purine ribonucleoside diphosphate metabolic process                      | -7.07829 |
| GO:0007178 | transmembrane receptor protein serine/threonine kinase signaling pathway | -7.05192 |
| GO:0010469 | regulation of signaling receptor activity                                | -7.05141 |
| GO:0032640 | tumor necrosis factor production                                         | -7.05141 |
| GO:0050435 | amyloid-beta metabolic process                                           | -7.04669 |
| GO:0000305 | response to oxygen radical                                               | -7.04295 |
| GO:0043632 | modification-dependent macromolecule catabolic process                   | -7.03865 |
| GO:2000146 | negative regulation of cell motility                                     | -7.03648 |

|            |                                                                |          |
|------------|----------------------------------------------------------------|----------|
| GO:0009201 | ribonucleoside triphosphate biosynthetic process               | -7.02663 |
| GO:0023061 | signal release                                                 | -7.02422 |
| GO:0030330 | DNA damage response, signal transduction by p53 class mediator | -7.00872 |
| GO:0032611 | interleukin-1 beta production                                  | -7.00872 |
| GO:0014015 | positive regulation of gliogenesis                             | -7.0068  |
| GO:0046902 | regulation of mitochondrial membrane permeability              | -7.0068  |
| GO:0009185 | ribonucleoside diphosphate metabolic process                   | -6.9907  |
| GO:0050999 | regulation of nitric-oxide synthase activity                   | -6.98658 |
| GO:0002699 | positive regulation of immune effector process                 | -6.98153 |
| GO:0044257 | cellular protein catabolic process                             | -6.97486 |
| GO:0051961 | negative regulation of nervous system development              | -6.96676 |
| GO:0002274 | myeloid leukocyte activation                                   | -6.96466 |
| GO:0051385 | response to mineralocorticoid                                  | -6.95542 |
| GO:0009792 | embryo development ending in birth or egg hatching             | -6.95417 |
| GO:0015732 | prostaglandin transport                                        | -6.93729 |
| GO:0030540 | female genitalia development                                   | -6.93729 |
| GO:1904355 | positive regulation of telomere capping                        | -6.93729 |
| GO:0042737 | drug catabolic process                                         | -6.93346 |
| GO:0006986 | response to unfolded protein                                   | -6.92906 |
| GO:0071706 | tumor necrosis factor superfamily cytokine production          | -6.92906 |
| GO:0032731 | positive regulation of interleukin-1 beta production           | -6.92775 |
| GO:0043392 | negative regulation of DNA binding                             | -6.92775 |

|                |                                                               |          |
|----------------|---------------------------------------------------------------|----------|
| GO:00973<br>66 | response to bronchodilator                                    | -6.92775 |
| GO:00712<br>60 | cellular response to mechanical stimulus                      | -6.91887 |
| GO:00507<br>69 | positive regulation of neurogenesis                           | -6.90858 |
| GO:00082<br>86 | insulin receptor signaling pathway                            | -6.90518 |
| GO:00323<br>88 | positive regulation of intracellular transport                | -6.8976  |
| GO:19019<br>87 | regulation of cell cycle phase transition                     | -6.89589 |
| GO:00463<br>28 | regulation of JNK cascade                                     | -6.88119 |
| GO:00061<br>10 | regulation of glycolytic process                              | -6.87583 |
| GO:00435<br>52 | positive regulation of phosphatidylinositol 3-kinase activity | -6.87092 |
| GO:19020<br>03 | regulation of amyloid-beta formation                          | -6.87092 |
| GO:19046<br>59 | glucose transmembrane transport                               | -6.87066 |
| GO:00308<br>57 | negative regulation of epithelial cell differentiation        | -6.87015 |
| GO:00310<br>50 | dsRNA processing                                              | -6.87015 |
| GO:00709<br>18 | production of small RNA involved in gene silencing by RNA     | -6.87015 |
| GO:00346<br>55 | nucleobase-containing compound catabolic process              | -6.86068 |
| GO:00091<br>66 | nucleotide catabolic process                                  | -6.85748 |
| GO:00344<br>04 | nucleobase-containing small molecule biosynthetic process     | -6.85628 |
| GO:00028<br>31 | regulation of response to biotic stimulus                     | -6.84927 |
| GO:00193<br>59 | nicotinamide nucleotide biosynthetic process                  | -6.84927 |
| GO:00193<br>63 | pyridine nucleotide biosynthetic process                      | -6.84927 |
| GO:00326<br>52 | regulation of interleukin-1 production                        | -6.83702 |
| GO:00468<br>22 | regulation of nucleocytoplasmic transport                     | -6.83702 |

|            |                                                               |          |
|------------|---------------------------------------------------------------|----------|
| GO:0008217 | regulation of blood pressure                                  | -6.83391 |
| GO:0061138 | morphogenesis of a branching epithelium                       | -6.83391 |
| GO:0010833 | telomere maintenance via telomere lengthening                 | -6.83338 |
| GO:0071158 | positive regulation of cell cycle arrest                      | -6.83338 |
| GO:0051962 | positive regulation of nervous system development             | -6.81885 |
| GO:0051353 | positive regulation of oxidoreductase activity                | -6.81371 |
| GO:0002285 | lymphocyte activation involved in immune response             | -6.81048 |
| GO:0016049 | cell growth                                                   | -6.808   |
| GO:0032963 | collagen metabolic process                                    | -6.80371 |
| GO:2000278 | regulation of DNA biosynthetic process                        | -6.80371 |
| GO:0002756 | MyD88-independent toll-like receptor signaling pathway        | -6.78925 |
| GO:0042311 | vasodilation                                                  | -6.78925 |
| GO:0071478 | cellular response to radiation                                | -6.7872  |
| GO:0002218 | activation of innate immune response                          | -6.78627 |
| GO:0009123 | nucleoside monophosphate metabolic process                    | -6.78144 |
| GO:0008645 | hexose transmembrane transport                                | -6.77073 |
| GO:0016101 | diterpenoid metabolic process                                 | -6.77073 |
| GO:0072525 | pyridine-containing compound biosynthetic process             | -6.767   |
| GO:0009152 | purine ribonucleotide biosynthetic process                    | -6.75377 |
| GO:0002718 | regulation of cytokine production involved in immune response | -6.75021 |
| GO:0030811 | regulation of nucleotide catabolic process                    | -6.75021 |
| GO:0035265 | organ growth                                                  | -6.74106 |



|            |                                                                                                                                         |          |
|------------|-----------------------------------------------------------------------------------------------------------------------------------------|----------|
| GO:0006096 | glycolytic process                                                                                                                      | -6.73807 |
| GO:0009914 | hormone transport                                                                                                                       | -6.72241 |
| GO:1901292 | nucleoside phosphate catabolic process                                                                                                  | -6.7182  |
| GO:1901030 | positive regulation of mitochondrial outer membrane permeabilization involved in apoptotic signaling pathway                            | -6.71022 |
| GO:0006757 | ATP generation from ADP                                                                                                                 | -6.70573 |
| GO:0015749 | monosaccharide transmembrane transport                                                                                                  | -6.70573 |
| GO:0001541 | ovarian follicle development                                                                                                            | -6.70419 |
| GO:0060760 | positive regulation of response to cytokine stimulus                                                                                    | -6.70419 |
| GO:0019362 | pyridine nucleotide metabolic process                                                                                                   | -6.69548 |
| GO:0046496 | nicotinamide nucleotide metabolic process                                                                                               | -6.69548 |
| GO:0002822 | regulation of adaptive immune response based on somatic recombination of immune receptors built from immunoglobulin superfamily domains | -6.68658 |
| GO:0043500 | muscle adaptation                                                                                                                       | -6.67371 |
| GO:0060749 | mammary gland alveolus development                                                                                                      | -6.66852 |
| GO:0061377 | mammary gland lobule development                                                                                                        | -6.66852 |
| GO:1902176 | negative regulation of oxidative stress-induced intrinsic apoptotic signaling pathway                                                   | -6.66852 |
| GO:0043551 | regulation of phosphatidylinositol 3-kinase activity                                                                                    | -6.65102 |
| GO:1900408 | negative regulation of cellular response to oxidative stress                                                                            | -6.65102 |
| GO:1903202 | negative regulation of oxidative stress-induced cell death                                                                              | -6.65102 |
| GO:0007219 | Notch signaling pathway                                                                                                                 | -6.65043 |
| GO:0021700 | developmental maturation                                                                                                                | -6.64853 |
| GO:0034219 | carbohydrate transmembrane transport                                                                                                    | -6.64199 |

|            |                                                                                   |          |
|------------|-----------------------------------------------------------------------------------|----------|
| GO:0006090 | pyruvate metabolic process                                                        | -6.63396 |
| GO:0002701 | negative regulation of production of molecular mediator of immune response        | -6.63369 |
| GO:0042554 | superoxide anion generation                                                       | -6.63369 |
| GO:1901099 | negative regulation of signal transduction in absence of ligand                   | -6.63369 |
| GO:2001240 | negative regulation of extrinsic apoptotic signaling pathway in absence of ligand | -6.63369 |
| GO:0038093 | Fc receptor signaling pathway                                                     | -6.61688 |
| GO:0042866 | pyruvate biosynthetic process                                                     | -6.61057 |
| GO:0006636 | unsaturated fatty acid biosynthetic process                                       | -6.59886 |
| GO:0045454 | cell redox homeostasis                                                            | -6.59886 |
| GO:0042509 | regulation of tyrosine phosphorylation of STAT protein                            | -6.59039 |
| GO:0072507 | divalent inorganic cation homeostasis                                             | -6.57705 |
| GO:0048568 | embryonic organ development                                                       | -6.57629 |
| GO:0090322 | regulation of superoxide metabolic process                                        | -6.5595  |
| GO:0009132 | nucleoside diphosphate metabolic process                                          | -6.55646 |
| GO:0050729 | positive regulation of inflammatory response                                      | -6.55646 |
| GO:0002065 | columnar/cuboidal epithelial cell differentiation                                 | -6.54861 |
| GO:0032732 | positive regulation of interleukin-1 production                                   | -6.54767 |
| GO:1902883 | negative regulation of response to oxidative stress                               | -6.54767 |
| GO:0071800 | podosome assembly                                                                 | -6.54617 |
| GO:1902004 | positive regulation of amyloid-beta formation                                     | -6.54617 |
| GO:0072524 | pyridine-containing compound metabolic process                                    | -6.54011 |
| GO:0090316 | positive regulation of intracellular protein transport                            | -6.531   |

|                |                                                                 |          |
|----------------|-----------------------------------------------------------------|----------|
| GO:00092<br>60 | ribonucleotide biosynthetic process                             | -6.529   |
| GO:00064<br>69 | negative regulation of protein kinase activity                  | -6.52121 |
| GO:00017<br>63 | morphogenesis of a branching structure                          | -6.51843 |
| GO:19012<br>22 | regulation of NIK/NF-kappaB signaling                           | -6.51807 |
| GO:00091<br>44 | purine nucleoside triphosphate metabolic process                | -6.50597 |
| GO:19043<br>56 | regulation of telomere maintenance via telomere lengthening     | -6.49742 |
| GO:00059<br>96 | monosaccharide metabolic process                                | -6.49547 |
| GO:00713<br>92 | cellular response to estradiol stimulus                         | -6.48751 |
| GO:19058<br>98 | positive regulation of response to endoplasmic reticulum stress | -6.48751 |
| GO:00072<br>60 | tyrosine phosphorylation of STAT protein                        | -6.4758  |
| GO:00434<br>70 | regulation of carbohydrate catabolic process                    | -6.4758  |
| GO:00430<br>09 | chordate embryonic development                                  | -6.47247 |
| GO:00468<br>49 | bone remodeling                                                 | -6.43856 |
| GO:00518<br>99 | membrane depolarization                                         | -6.43856 |
| GO:00359<br>66 | response to topologically incorrect protein                     | -6.43293 |
| GO:00610<br>42 | vascular wound healing                                          | -6.43066 |
| GO:19019<br>91 | negative regulation of mitotic cell cycle phase transition      | -6.42778 |
| GO:00140<br>37 | Schwann cell differentiation                                    | -6.41761 |
| GO:00342<br>05 | amyloid-beta formation                                          | -6.41761 |
| GO:00605<br>57 | positive regulation of vitamin D biosynthetic process           | -6.41227 |
| GO:00605<br>59 | positive regulation of calcidiol 1-monooxygenase activity       | -6.41227 |
| GO:00071<br>79 | transforming growth factor beta receptor signaling pathway      | -6.41186 |

|                |                                                           |          |
|----------------|-----------------------------------------------------------|----------|
| GO:00466<br>61 | male sex differentiation                                  | -6.40638 |
| GO:00069<br>13 | nucleocytoplasmic transport                               | -6.40166 |
| GO:00315<br>71 | mitotic G1 DNA damage checkpoint                          | -6.39961 |
| GO:00068<br>05 | xenobiotic metabolic process                              | -6.39865 |
| GO:00463<br>90 | ribose phosphate biosynthetic process                     | -6.39647 |
| GO:00075<br>07 | heart development                                         | -6.39606 |
| GO:00302<br>17 | T cell differentiation                                    | -6.39103 |
| GO:00170<br>38 | protein import                                            | -6.3909  |
| GO:00070<br>88 | regulation of mitotic nuclear division                    | -6.38198 |
| GO:00068<br>20 | anion transport                                           | -6.38186 |
| GO:00000<br>86 | G2/M transition of mitotic cell cycle                     | -6.37278 |
| GO:00460<br>31 | ADP metabolic process                                     | -6.36946 |
| GO:00511<br>69 | nuclear transport                                         | -6.35771 |
| GO:00447<br>83 | G1 DNA damage checkpoint                                  | -6.35199 |
| GO:00448<br>19 | mitotic G1/S transition checkpoint                        | -6.35199 |
| GO:00454<br>53 | bone resorption                                           | -6.35199 |
| GO:00323<br>50 | regulation of hormone metabolic process                   | -6.34967 |
| GO:00423<br>07 | positive regulation of protein import into nucleus        | -6.34967 |
| GO:19029<br>91 | regulation of amyloid precursor protein catabolic process | -6.34967 |
| GO:00109<br>48 | negative regulation of cell cycle process                 | -6.32867 |
| GO:00519<br>00 | regulation of mitochondrial depolarization                | -6.32127 |
| GO:00467<br>17 | acid secretion                                            | -6.31186 |

|            |                                                                                                                         |          |
|------------|-------------------------------------------------------------------------------------------------------------------------|----------|
| GO:0031341 | regulation of cell killing                                                                                              | -6.29401 |
| GO:0097194 | execution phase of apoptosis                                                                                            | -6.29401 |
| GO:0030278 | regulation of ossification                                                                                              | -6.28786 |
| GO:0038095 | Fc-epsilon receptor signaling pathway                                                                                   | -6.28603 |
| GO:0042533 | tumor necrosis factor biosynthetic process                                                                              | -6.2836  |
| GO:0042534 | regulation of tumor necrosis factor biosynthetic process                                                                | -6.2836  |
| GO:0071548 | response to dexamethasone                                                                                               | -6.2836  |
| GO:0006733 | oxidoreduction coenzyme metabolic process                                                                               | -6.2676  |
| GO:0035249 | synaptic transmission, glutamatergic                                                                                    | -6.25893 |
| GO:0051196 | regulation of coenzyme metabolic process                                                                                | -6.25893 |
| GO:0046034 | ATP metabolic process                                                                                                   | -6.25229 |
| GO:0002676 | regulation of chronic inflammatory response                                                                             | -6.24672 |
| GO:0051302 | regulation of cell division                                                                                             | -6.23903 |
| GO:0009141 | nucleoside triphosphate metabolic process                                                                               | -6.22853 |
| GO:2001023 | regulation of response to drug                                                                                          | -6.22426 |
| GO:0001558 | regulation of cell growth                                                                                               | -6.21934 |
| GO:1904591 | positive regulation of protein import                                                                                   | -6.2193  |
| GO:0051043 | regulation of membrane protein ectodomain proteolysis                                                                   | -6.2174  |
| GO:0060149 | negative regulation of posttranscriptional gene silencing                                                               | -6.2174  |
| GO:0060967 | negative regulation of gene silencing by RNA                                                                            | -6.2174  |
| GO:1901522 | positive regulation of transcription from RNA polymerase II promoter involved in cellular response to chemical stimulus | -6.2174  |
| GO:19037   | regulation of production of miRNAs involved in                                                                          | -6.2174  |

|            |                                                                                                                           |          |          |
|------------|---------------------------------------------------------------------------------------------------------------------------|----------|----------|
| 98         | gene silencing by miRNA                                                                                                   |          |          |
| GO:0010498 | proteasomal protein catabolic process                                                                                     | -6.20677 |          |
| GO:0006165 | nucleoside diphosphate phosphorylation                                                                                    | -6.19962 |          |
| GO:0043161 | proteasome-mediated ubiquitin-dependent protein catabolic process                                                         | -6.19365 |          |
| GO:0033209 | tumor necrosis factor-mediated signaling pathway                                                                          | -6.19266 |          |
| GO:0032651 | regulation of interleukin-1 beta production                                                                               | -6.18999 |          |
| GO:0045833 | negative regulation of lipid metabolic process                                                                            | -6.18999 |          |
| GO:0071674 | mononuclear cell migration                                                                                                | -6.18999 |          |
| GO:0016236 | macroautophagy                                                                                                            | -6.18981 |          |
| GO:0010810 | regulation of cell-substrate adhesion                                                                                     | -6.18762 |          |
| GO:0045123 | cellular extravasation                                                                                                    | -6.16946 |          |
| GO:0045124 | regulation of bone resorption                                                                                             | -6.15668 |          |
| GO:0000075 | cell cycle checkpoint                                                                                                     | -6.14827 |          |
| GO:0046939 | nucleotide phosphorylation                                                                                                | -6.14493 |          |
| GO:0002460 | adaptive immune response based on somatic recombination of immune receptors built from immunoglobulin superfamily domains | -6.14453 |          |
| GO:1902903 | regulation of supramolecular fiber organization                                                                           | -6.14453 |          |
| GO:0033673 | negative regulation of kinase activity                                                                                    | -6.12583 |          |
| GO:0007004 | telomere maintenance via telomerase                                                                                       | -6.12568 |          |
| GO:0019748 | secondary metabolic process                                                                                               | -6.12568 |          |
| GO:0071230 | cellular response to amino acid stimulus                                                                                  | -6.12568 |          |
| GO:0001906 | cell killing                                                                                                              |          | -6.12424 |
| GO:00215   | pallium development                                                                                                       | -6.12424 |          |

|            |                                                                                             |          |
|------------|---------------------------------------------------------------------------------------------|----------|
| 43         |                                                                                             |          |
| GO:0036003 | positive regulation of transcription from RNA polymerase II promoter in response to stress  | -6.11853 |
| GO:0051882 | mitochondrial depolarization                                                                | -6.11853 |
| GO:0050671 | positive regulation of lymphocyte proliferation                                             | -6.11793 |
| GO:0045861 | negative regulation of proteolysis                                                          | -6.10315 |
| GO:0050680 | negative regulation of epithelial cell proliferation                                        | -6.10173 |
| GO:1901031 | regulation of response to reactive oxygen species                                           | -6.09565 |
| GO:1901988 | negative regulation of cell cycle phase transition                                          | -6.0918  |
| GO:0030183 | B cell differentiation                                                                      | -6.09116 |
| GO:0032946 | positive regulation of mononuclear cell proliferation                                       | -6.09116 |
| GO:0043280 | positive regulation of cysteine-type endopeptidase activity involved in apoptotic process   | -6.09116 |
| GO:0019722 | calcium-mediated signaling                                                                  | -6.09002 |
| GO:0072503 | cellular divalent inorganic cation homeostasis                                              | -6.08993 |
| GO:0015908 | fatty acid transport                                                                        | -6.08949 |
| GO:0050715 | positive regulation of cytokine secretion                                                   | -6.08261 |
| GO:0090303 | positive regulation of wound healing                                                        | -6.08261 |
| GO:0043619 | regulation of transcription from RNA polymerase II promoter in response to oxidative stress | -6.05293 |
| GO:0051712 | positive regulation of killing of cells of other organism                                   | -6.05293 |
| GO:0051235 | maintenance of location                                                                     | -6.05264 |
| GO:0044839 | cell cycle G2/M phase transition                                                            | -6.04131 |
| GO:0006509 | membrane protein ectodomain proteolysis                                                     | -6.03615 |
| GO:00341   | positive regulation of tissue remodeling                                                    | -6.03615 |

|            |                                                                                                     |          |
|------------|-----------------------------------------------------------------------------------------------------|----------|
| 05         |                                                                                                     |          |
| GO:0035094 | response to nicotine                                                                                | -6.03615 |
| GO:1901028 | regulation of mitochondrial outer membrane permeabilization involved in apoptotic signaling pathway | -6.03615 |
| GO:1901796 | regulation of signal transduction by p53 class mediator                                             | -6.03507 |
| GO:0046883 | regulation of hormone secretion                                                                     | -6.02463 |
| GO:0070498 | interleukin-1-mediated signaling pathway                                                            | -6.02433 |
| GO:0042535 | positive regulation of tumor necrosis factor biosynthetic process                                   | -6.02421 |
| GO:0045619 | regulation of lymphocyte differentiation                                                            | -6.01314 |
| GO:0008584 | male gonad development                                                                              | -5.98623 |
| GO:0043401 | steroid hormone mediated signaling pathway                                                          | -5.98623 |
| GO:0032309 | icosanoid secretion                                                                                 | -5.9781  |
| GO:0032570 | response to progesterone                                                                            | -5.9781  |
| GO:0046546 | development of primary male sexual characteristics                                                  | -5.96052 |
| GO:0070227 | lymphocyte apoptotic process                                                                        | -5.95739 |
| GO:0072401 | signal transduction involved in DNA integrity checkpoint                                            | -5.95739 |
| GO:0072422 | signal transduction involved in DNA damage checkpoint                                               | -5.95739 |
| GO:0051051 | negative regulation of transport                                                                    | -5.9536  |
| GO:0060562 | epithelial tube morphogenesis                                                                       | -5.9491  |
| GO:0002695 | negative regulation of leukocyte activation                                                         | -5.94817 |
| GO:0010950 | positive regulation of endopeptidase activity                                                       | -5.94817 |
| GO:0001783 | B cell apoptotic process                                                                            | -5.93404 |
| GO:0002092 | positive regulation of receptor internalization                                                     | -5.93404 |



|                |                                                                          |          |
|----------------|--------------------------------------------------------------------------|----------|
| GO:00706<br>33 | transepithelial transport                                                | -5.93404 |
| GO:19043<br>53 | regulation of telomere capping                                           | -5.93404 |
| GO:00069<br>53 | acute-phase response                                                     | -5.92143 |
| GO:00140<br>75 | response to amine                                                        | -5.92143 |
| GO:00488<br>06 | genitalia development                                                    | -5.92143 |
| GO:00723<br>95 | signal transduction involved in cell cycle checkpoint                    | -5.91692 |
| GO:00329<br>90 | cell part morphogenesis                                                  | -5.91553 |
| GO:19907<br>78 | protein localization to cell periphery                                   | -5.90553 |
| GO:00016<br>49 | osteoblast differentiation                                               | -5.90234 |
| GO:00423<br>68 | vitamin D biosynthetic process                                           | -5.87933 |
| GO:00726<br>59 | protein localization to plasma membrane                                  | -5.87768 |
| GO:00436<br>27 | response to estrogen                                                     | -5.87705 |
| GO:00015<br>23 | retinoid metabolic process                                               | -5.86746 |
| GO:00085<br>93 | regulation of Notch signaling pathway                                    | -5.86746 |
| GO:20012<br>39 | regulation of extrinsic apoptotic signaling pathway in absence of ligand | -5.86608 |
| GO:00713<br>22 | cellular response to carbohydrate stimulus                               | -5.85973 |
| GO:00062<br>78 | RNA-dependent DNA biosynthetic process                                   | -5.83777 |
| GO:00454<br>44 | fat cell differentiation                                                 | -5.82991 |
| GO:00517<br>83 | regulation of nuclear division                                           | -5.82182 |
| GO:00092<br>05 | purine ribonucleoside triphosphate metabolic process                     | -5.8198  |
| GO:00140<br>38 | regulation of Schwann cell differentiation                               | -5.81257 |
| GO:00026<br>86 | negative regulation of leukocyte migration                               | -5.812   |

|            |                                                                      |          |
|------------|----------------------------------------------------------------------|----------|
| GO:0035196 | production of miRNAs involved in gene silencing by miRNA             | -5.812   |
| GO:0090199 | regulation of release of cytochrome c from mitochondria              | -5.812   |
| GO:1990090 | cellular response to nerve growth factor stimulus                    | -5.812   |
| GO:0006874 | cellular calcium ion homeostasis                                     | -5.80195 |
| GO:0033157 | regulation of intracellular protein transport                        | -5.77653 |
| GO:0003012 | muscle system process                                                | -5.767   |
| GO:0010575 | positive regulation of vascular endothelial growth factor production | -5.76484 |
| GO:0033598 | mammary gland epithelial cell proliferation                          | -5.76484 |
| GO:1900101 | regulation of endoplasmic reticulum unfolded protein response        | -5.76484 |
| GO:1990776 | response to angiotensin                                              | -5.76484 |
| GO:2000191 | regulation of fatty acid transport                                   | -5.76484 |
| GO:0045580 | regulation of T cell differentiation                                 | -5.76204 |
| GO:0046850 | regulation of bone remodeling                                        | -5.75912 |
| GO:1903727 | positive regulation of phospholipid metabolic process                | -5.75912 |
| GO:0099565 | chemical synaptic transmission, postsynaptic                         | -5.74774 |
| GO:0008643 | carbohydrate transport                                               | -5.73809 |
| GO:0009199 | ribonucleoside triphosphate metabolic process                        | -5.7359  |
| GO:0000271 | polysaccharide biosynthetic process                                  | -5.72329 |
| GO:0010827 | regulation of glucose transmembrane transport                        | -5.72329 |
| GO:0030656 | regulation of vitamin metabolic process                              | -5.72213 |
| GO:0061043 | regulation of vascular wound healing                                 | -5.72213 |
| GO:0071287 | cellular response to manganese ion                                   | -5.72213 |

|                |                                                                        |          |
|----------------|------------------------------------------------------------------------|----------|
| GO:19001<br>03 | positive regulation of endoplasmic reticulum unfolded protein response | -5.72213 |
| GO:00352<br>72 | exocrine system development                                            | -5.70741 |
| GO:00380<br>84 | vascular endothelial growth factor signaling pathway                   | -5.70741 |
| GO:00519<br>72 | regulation of telomerase activity                                      | -5.70741 |
| GO:00610<br>28 | establishment of endothelial barrier                                   | -5.70741 |
| GO:00420<br>98 | T cell proliferation                                                   | -5.70002 |
| GO:00986<br>93 | regulation of synaptic vesicle cycle                                   | -5.68967 |
| GO:00322<br>04 | regulation of telomere maintenance                                     | -5.68621 |
| GO:00486<br>78 | response to axon injury                                                | -5.68621 |
| GO:19012<br>24 | positive regulation of NIK/NF-kappaB signaling                         | -5.68621 |
| GO:00328<br>00 | receptor biosynthetic process                                          | -5.68524 |
| GO:00615<br>64 | axon development                                                       | -5.68237 |
| GO:00016<br>78 | cellular glucose homeostasis                                           | -5.66729 |
| GO:00082<br>03 | cholesterol metabolic process                                          | -5.66729 |
| GO:00512<br>50 | negative regulation of lymphocyte activation                           | -5.66729 |
| GO:20010<br>56 | positive regulation of cysteine-type endopeptidase activity            | -5.66729 |
| GO:00550<br>74 | calcium ion homeostasis                                                | -5.66383 |
| GO:00001<br>86 | activation of MAPKK activity                                           | -5.65681 |
| GO:00512<br>05 | protein insertion into membrane                                        | -5.65681 |
| GO:19900<br>89 | response to nerve growth factor                                        | -5.65681 |
| GO:00022<br>24 | toll-like receptor signaling pathway                                   | -5.64405 |
| GO:00022<br>62 | myeloid cell homeostasis                                               | -5.64405 |

|                |                                                                                          |          |                  |
|----------------|------------------------------------------------------------------------------------------|----------|------------------|
| GO:00469<br>42 | carboxylic acid transport                                                                | -5.64023 |                  |
| GO:00316<br>23 | receptor internalization                                                                 | -5.63275 |                  |
| GO:00158<br>49 | organic acid transport                                                                   | -5.62675 |                  |
| GO:00346<br>44 | cellular response to UV                                                                  | -5.61357 |                  |
| GO:00018<br>44 | protein insertion into mitochondrial membrane<br>involved in apoptotic signaling pathway | -5.60864 |                  |
| GO:00108<br>00 | positive regulation of peptidyl-threonine<br>phosphorylation                             | -5.60864 |                  |
| GO:00434<br>57 | regulation of cellular respiration                                                       | -5.60864 |                  |
| GO:00322<br>10 | regulation of telomere maintenance via<br>telomerase                                     | -5.60727 |                  |
| GO:00063<br>52 | DNA-templated transcription, initiation                                                  | -5.60416 |                  |
| GO:19026<br>52 | secondary alcohol metabolic process                                                      | -5.59806 |                  |
| GO:00508<br>90 | cognition                                                                                |          | -<br>5.5850<br>3 |
| GO:00302<br>13 | hyaluronan biosynthetic process                                                          | -5.5785  |                  |
| GO:00323<br>10 | prostaglandin secretion                                                                  | -5.5785  |                  |
| GO:00517<br>09 | regulation of killing of cells of other organism                                         | -5.5785  |                  |
| GO:19037<br>99 | negative regulation of production of miRNAs<br>involved in gene silencing by miRNA       | -5.5785  |                  |
| GO:00226<br>17 | extracellular matrix disassembly                                                         | -5.57799 |                  |
| GO:00311<br>45 | anaphase-promoting complex-dependent<br>catabolic process                                | -5.57799 |                  |
| GO:19029<br>30 | regulation of alcohol biosynthetic process                                               | -5.57799 |                  |
| GO:19030<br>36 | positive regulation of response to wounding                                              | -5.57799 |                  |
| GO:00075<br>69 | cell aging                                                                               |          | -<br>5.5769<br>2 |
| GO:00456<br>64 | regulation of neuron differentiation                                                     | -5.5657  |                  |

|                |                                                                                               |          |
|----------------|-----------------------------------------------------------------------------------------------|----------|
| GO:00106<br>39 | negative regulation of organelle organization                                                 | -5.55138 |
| GO:00715<br>49 | cellular response to dexamethasone stimulus                                                   | -5.53484 |
| GO:00108<br>76 | lipid localization                                                                            | -5.52744 |
| GO:00193<br>18 | hexose metabolic process                                                                      | -5.52102 |
| GO:00459<br>26 | negative regulation of growth                                                                 | -5.52102 |
| GO:00326<br>55 | regulation of interleukin-12 production                                                       | -5.51124 |
| GO:00973<br>45 | mitochondrial outer membrane permeabilization                                                 | -5.51124 |
| GO:00347<br>67 | positive regulation of ion transmembrane transport                                            | -5.50808 |
| GO:00091<br>50 | purine ribonucleotide metabolic process                                                       | -5.50712 |
| GO:20001<br>06 | regulation of leukocyte apoptotic process                                                     | -5.47405 |
| GO:00069<br>77 | DNA damage response, signal transduction by p53 class mediator resulting in cell cycle arrest | -5.46466 |
| GO:00109<br>51 | negative regulation of endopeptidase activity                                                 | -5.4559  |
| GO:00902<br>87 | regulation of cellular response to growth factor stimulus                                     | -5.45406 |
| GO:00423<br>62 | fat-soluble vitamin biosynthetic process                                                      | -5.4463  |
| GO:00510<br>44 | positive regulation of membrane protein ectodomain proteolysis                                | -5.4463  |
| GO:00905<br>94 | inflammatory response to wounding                                                             | -5.4463  |
| GO:20010<br>28 | positive regulation of endothelial cell chemotaxis                                            | -5.4463  |
| GO:00017<br>64 | neuron migration                                                                              | -5.44227 |
| GO:00461<br>65 | alcohol biosynthetic process                                                                  | -5.44227 |
| GO:00091<br>08 | coenzyme biosynthetic process                                                                 | -5.43981 |
| GO:00074<br>20 | brain development                                                                             | -5.43254 |
| GO:00027<br>03 | regulation of leukocyte mediated immunity                                                     | -5.43197 |

|            |                                                                                  |          |
|------------|----------------------------------------------------------------------------------|----------|
| GO:0030520 | intracellular estrogen receptor signaling pathway                                | -5.419   |
| GO:0032615 | interleukin-12 production                                                        | -5.419   |
| GO:0071398 | cellular response to fatty acid                                                  | -5.419   |
| GO:0072431 | signal transduction involved in mitotic G1 DNA damage checkpoint                 | -5.419   |
| GO:1902400 | intracellular signal transduction involved in G1 DNA damage checkpoint           | -5.419   |
| GO:1905517 | macrophage migration                                                             | -5.419   |
| GO:0002677 | negative regulation of chronic inflammatory response                             | -5.41698 |
| GO:0014805 | smooth muscle adaptation                                                         | -5.41698 |
| GO:0032747 | positive regulation of interleukin-23 production                                 | -5.41698 |
| GO:0046136 | positive regulation of vitamin metabolic process                                 | -5.41698 |
| GO:1990962 | drug transport across blood-brain barrier                                        | -5.41698 |
| GO:0002688 | regulation of leukocyte chemotaxis                                               | -5.41566 |
| GO:0046889 | positive regulation of lipid biosynthetic process                                | -5.40698 |
| GO:0045736 | negative regulation of cyclin-dependent protein serine/threonine kinase activity | -5.39487 |
| GO:0046434 | organophosphate catabolic process                                                | -5.39198 |
| GO:0001952 | regulation of cell-matrix adhesion                                               | -5.38964 |
| GO:0006869 | lipid transport                                                                  | -5.37924 |
| GO:0042129 | regulation of T cell proliferation                                               | -5.37784 |
| GO:0021537 | telencephalon development                                                        | -5.37618 |
| GO:0002090 | regulation of receptor internalization                                           | -5.37421 |
| GO:0007566 | embryo implantation                                                              | -5.37421 |
| GO:0035306 | positive regulation of dephosphorylation                                         | -5.37421 |

|            |                                                                   |          |
|------------|-------------------------------------------------------------------|----------|
| GO:0034605 | cellular response to heat                                         | -5.36386 |
| GO:0016051 | carbohydrate biosynthetic process                                 | -5.35921 |
| GO:0009259 | ribonucleotide metabolic process                                  | -5.35823 |
| GO:0034250 | positive regulation of cellular amide metabolic process           | -5.35665 |
| GO:0042058 | regulation of epidermal growth factor receptor signaling pathway  | -5.3416  |
| GO:0042306 | regulation of protein import into nucleus                         | -5.33028 |
| GO:0072413 | signal transduction involved in mitotic cell cycle checkpoint     | -5.33028 |
| GO:1902402 | signal transduction involved in mitotic DNA damage checkpoint     | -5.33028 |
| GO:1902403 | signal transduction involved in mitotic DNA integrity checkpoint  | -5.33028 |
| GO:0032212 | positive regulation of telomere maintenance via telomerase        | -5.32837 |
| GO:0051204 | protein insertion into mitochondrial membrane                     | -5.32837 |
| GO:1904030 | negative regulation of cyclin-dependent protein kinase activity   | -5.32837 |
| GO:0002070 | epithelial cell maturation                                        | -5.32385 |
| GO:0034116 | positive regulation of heterotypic cell-cell adhesion             | -5.32385 |
| GO:0051770 | positive regulation of nitric-oxide synthase biosynthetic process | -5.32385 |
| GO:1901550 | regulation of endothelial cell development                        | -5.32385 |
| GO:1903140 | regulation of establishment of endothelial barrier                | -5.32385 |
| GO:0051701 | interaction with host                                             | -5.32343 |
| GO:0002250 | adaptive immune response                                          | -5.32183 |
| GO:0032874 | positive regulation of stress-activated MAPK cascade              | -5.31472 |
| GO:1905952 | regulation of lipid localization                                  | -5.31472 |
| GO:0046879 | hormone secretion                                                 | -5.31383 |

|            |                                                                                          |          |
|------------|------------------------------------------------------------------------------------------|----------|
| GO:0033273 | response to vitamin                                                                      | -5.30952 |
| GO:0060333 | interferon-gamma-mediated signaling pathway                                              | -5.30952 |
| GO:0061098 | positive regulation of protein tyrosine kinase activity                                  | -5.28716 |
| GO:0032760 | positive regulation of tumor necrosis factor production                                  | -5.27783 |
| GO:0106027 | neuron projection organization                                                           | -5.27783 |
| GO:0070304 | positive regulation of stress-activated protein kinase signaling cascade                 | -5.27336 |
| GO:0006691 | leukotriene metabolic process                                                            | -5.264   |
| GO:0032735 | positive regulation of interleukin-12 production                                         | -5.264   |
| GO:0060251 | regulation of glial cell proliferation                                                   | -5.264   |
| GO:0071312 | cellular response to alkaloid                                                            | -5.264   |
| GO:0015718 | monocarboxylic acid transport                                                            | -5.25289 |
| GO:0032088 | negative regulation of NF-kappaB transcription factor activity                           | -5.24653 |
| GO:0061097 | regulation of protein tyrosine kinase activity                                           | -5.24653 |
| GO:0046324 | regulation of glucose import                                                             | -5.24483 |
| GO:1902110 | positive regulation of mitochondrial membrane permeability involved in apoptotic process | -5.24483 |
| GO:0010466 | negative regulation of peptidase activity                                                | -5.23716 |
| GO:0034308 | primary alcohol metabolic process                                                        | -5.2156  |
| GO:1901992 | positive regulation of mitotic cell cycle phase transition                               | -5.2156  |
| GO:1903557 | positive regulation of tumor necrosis factor superfamily cytokine production             | -5.2156  |
| GO:0010803 | regulation of tumor necrosis factor-mediated signaling pathway                           | -5.20327 |
| GO:1904589 | regulation of protein import                                                             | -5.20327 |
| GO:0001893 | maternal placenta development                                                            | -5.20165 |



|            |                                                                                 |          |
|------------|---------------------------------------------------------------------------------|----------|
| GO:0045742 | positive regulation of epidermal growth factor receptor signaling pathway       | -5.20165 |
| GO:0051973 | positive regulation of telomerase activity                                      | -5.20165 |
| GO:0097435 | supramolecular fiber organization                                               | -5.18825 |
| GO:1903725 | regulation of phospholipid metabolic process                                    | -5.18504 |
| GO:0002768 | immune response-regulating cell surface receptor signaling pathway              | -5.18329 |
| GO:0030324 | lung development                                                                | -5.17235 |
| GO:0019693 | ribose phosphate metabolic process                                              | -5.16759 |
| GO:0032368 | regulation of lipid transport                                                   | -5.16567 |
| GO:0120035 | regulation of plasma membrane bounded cell projection organization              | -5.16365 |
| GO:1902686 | mitochondrial outer membrane permeabilization involved in programmed cell death | -5.16244 |
| GO:0002532 | production of molecular mediator involved in inflammatory response              | -5.15484 |
| GO:0010975 | regulation of neuron projection development                                     | -5.15319 |
| GO:0015980 | energy derivation by oxidation of organic compounds                             | -5.14751 |
| GO:0042692 | muscle cell differentiation                                                     | -5.14687 |
| GO:0071333 | cellular response to glucose stimulus                                           | -5.14184 |
| GO:0030212 | hyaluronan metabolic process                                                    | -5.14118 |
| GO:1904358 | positive regulation of telomere maintenance via telomere lengthening            | -5.14118 |
| GO:1901184 | regulation of ERBB signaling pathway                                            | -5.12499 |
| GO:0002066 | columnar/cuboidal epithelial cell development                                   | -5.12233 |
| GO:0070141 | response to UV-A                                                                | -5.11831 |
| GO:0140014 | mitotic nuclear division                                                        | -5.10356 |
| GO:00359   | response to muscle stretch                                                      | -5.1032  |

|                |                                                                                 |          |
|----------------|---------------------------------------------------------------------------------|----------|
| 94             |                                                                                 |          |
| GO:00507<br>64 | regulation of phagocytosis                                                      | -5.09548 |
| GO:00713<br>31 | cellular response to hexose stimulus                                            | -5.0948  |
| GO:19030<br>38 | negative regulation of leukocyte cell-cell adhesion                             | -5.0948  |
| GO:00303<br>23 | respiratory tube development                                                    | -5.0939  |
| GO:00105<br>73 | vascular endothelial growth factor production                                   | -5.08291 |
| GO:00357<br>94 | positive regulation of mitochondrial membrane permeability                      | -5.08291 |
| GO:00313<br>44 | regulation of cell projection organization                                      | -5.08265 |
| GO:00302<br>24 | monocyte differentiation                                                        | -5.08249 |
| GO:00327<br>33 | positive regulation of interleukin-10 production                                | -5.08249 |
| GO:19011<br>86 | positive regulation of ERBB signaling pathway                                   | -5.08249 |
| GO:19031<br>31 | mononuclear cell differentiation                                                | -5.08249 |
| GO:20012<br>52 | positive regulation of chromosome organization                                  | -5.0746  |
| GO:00463<br>30 | positive regulation of JNK cascade                                              | -5.07157 |
| GO:00713<br>26 | cellular response to monosaccharide stimulus                                    | -5.07157 |
| GO:00071<br>60 | cell-matrix adhesion                                                            | -5.06697 |
| GO:00165<br>79 | protein deubiquitination                                                        | -5.06017 |
| GO:00301<br>77 | positive regulation of Wnt signaling pathway                                    | -5.05543 |
| GO:00434<br>33 | negative regulation of DNA-binding transcription factor activity                | -5.05543 |
| GO:19021<br>08 | regulation of mitochondrial membrane permeability involved in apoptotic process | -5.04416 |
| GO:00516<br>40 | organelle localization                                                          | -5.03477 |
| GO:00488<br>12 | neuron projection morphogenesis                                                 | -5.02804 |

|                |                                                                     |          |
|----------------|---------------------------------------------------------------------|----------|
| GO:00726<br>55 | establishment of protein localization to mitochondrion              | -5.02569 |
| GO:00074<br>31 | salivary gland development                                          | -5.02548 |
| GO:00331<br>46 | regulation of intracellular estrogen receptor signaling pathway     | -5.02548 |
| GO:00463<br>26 | positive regulation of glucose import                               | -5.02548 |
| GO:00447<br>73 | mitotic DNA damage checkpoint                                       | -5.00896 |
| GO:19000<br>15 | regulation of cytokine production involved in inflammatory response | -5.00605 |
| GO:19057<br>10 | positive regulation of membrane permeability                        | -5.00605 |
| GO:00105<br>44 | negative regulation of platelet activation                          | -5.00303 |
| GO:00329<br>30 | positive regulation of superoxide anion generation                  | -5.00303 |
| GO:00457<br>80 | positive regulation of bone resorption                              | -5.00303 |
| GO:00468<br>52 | positive regulation of bone remodeling                              | -5.00303 |
| GO:00510<br>23 | regulation of immunoglobulin secretion                              | -5.00303 |
| GO:00709<br>89 | oxidative demethylation                                             | -5.00303 |
| GO:00435<br>02 | regulation of muscle adaptation                                     | -4.98076 |
| GO:00070<br>06 | mitochondrial membrane organization                                 | -4.98055 |
| GO:00457<br>40 | positive regulation of DNA replication                              | -4.97007 |
| GO:00506<br>91 | regulation of defense response to virus by host                     | -4.97007 |
| GO:20002<br>73 | positive regulation of signaling receptor activity                  | -4.97007 |
| GO:00108<br>12 | negative regulation of cell-substrate adhesion                      | -4.96857 |
| GO:00162<br>39 | positive regulation of macroautophagy                               | -4.96857 |
| GO:00067<br>32 | coenzyme metabolic process                                          | -4.96186 |
| GO:00455<br>98 | regulation of fat cell differentiation                              | -4.95825 |

|                |                                                                      |          |
|----------------|----------------------------------------------------------------------|----------|
| GO:00305<br>93 | neutrophil chemotaxis                                                | -4.95287 |
| GO:00600<br>79 | excitatory postsynaptic potential                                    | -4.95287 |
| GO:00063<br>67 | transcription initiation from RNA polymerase II promoter             | -4.9429  |
| GO:00600<br>78 | regulation of postsynaptic membrane potential                        | -4.93614 |
| GO:00705<br>85 | protein localization to mitochondrion                                | -4.93614 |
| GO:00326<br>49 | regulation of interferon-gamma production                            | -4.92529 |
| GO:20000<br>60 | positive regulation of ubiquitin-dependent protein catabolic process | -4.92529 |
| GO:00513<br>46 | negative regulation of hydrolase activity                            | -4.9207  |
| GO:01200<br>39 | plasma membrane bounded cell projection morphogenesis                | -4.91175 |
| GO:00025<br>44 | chronic inflammatory response                                        | -4.90861 |
| GO:00029<br>02 | regulation of B cell apoptotic process                               | -4.90861 |
| GO:00193<br>73 | epoxygenase P450 pathway                                             | -4.90861 |
| GO:00323<br>03 | regulation of icosanoid secretion                                    | -4.90861 |
| GO:00514<br>12 | response to corticosterone                                           | -4.90861 |
| GO:00517<br>67 | nitric-oxide synthase biosynthetic process                           | -4.90861 |
| GO:00517<br>69 | regulation of nitric-oxide synthase biosynthetic process             | -4.90861 |
| GO:00609<br>65 | negative regulation of gene silencing by miRNA                       | -4.90861 |
| GO:19004<br>09 | positive regulation of cellular response to oxidative stress         | -4.90861 |
| GO:00030<br>15 | heart process                                                        | -4.90571 |
| GO:00608<br>28 | regulation of canonical Wnt signaling pathway                        | -4.90571 |
| GO:00456<br>21 | positive regulation of lymphocyte differentiation                    | -4.898   |
| GO:00002<br>26 | microtubule cytoskeleton organization                                | -4.89725 |

|                |                                                                            |          |
|----------------|----------------------------------------------------------------------------|----------|
| GO:00025<br>34 | cytokine production involved in inflammatory response                      | -4.89542 |
| GO:00712<br>42 | cellular response to ammonium ion                                          | -4.89542 |
| GO:00723<br>47 | response to anesthetic                                                     | -4.89542 |
| GO:19033<br>20 | regulation of protein modification by small protein conjugation or removal | -4.89115 |
| GO:00439<br>02 | positive regulation of multi-organism process                              | -4.88819 |
| GO:00488<br>58 | cell projection morphogenesis                                              | -4.87912 |
| GO:00511<br>46 | striated muscle cell differentiation                                       | -4.87839 |
| GO:00029<br>33 | lipid hydroxylation                                                        | -4.87762 |
| GO:00098<br>20 | alkaloid metabolic process                                                 | -4.87762 |
| GO:00313<br>94 | positive regulation of prostaglandin biosynthetic process                  | -4.87762 |
| GO:00316<br>22 | positive regulation of fever generation                                    | -4.87762 |
| GO:00326<br>27 | interleukin-23 production                                                  | -4.87762 |
| GO:00326<br>67 | regulation of interleukin-23 production                                    | -4.87762 |
| GO:00605<br>58 | regulation of calcidiol 1-monooxygenase activity                           | -4.87762 |
| GO:01200<br>41 | positive regulation of macrophage proliferation                            | -4.87762 |
| GO:20013<br>00 | lipoxin metabolic process                                                  | -4.87762 |
| GO:20013<br>01 | lipoxin biosynthetic process                                               | -4.87762 |
| GO:00551<br>23 | digestive system development                                               | -4.87083 |
| GO:19040<br>64 | positive regulation of cation transmembrane transport                      | -4.87083 |
| GO:00482<br>46 | macrophage chemotaxis                                                      | -4.86371 |
| GO:00609<br>69 | negative regulation of gene silencing                                      | -4.86371 |
| GO:00902<br>79 | regulation of calcium ion import                                           | -4.86371 |

|                |                                                                     |          |
|----------------|---------------------------------------------------------------------|----------|
| GO:19040<br>37 | positive regulation of epithelial cell apoptotic process            | -4.86371 |
| GO:00106<br>75 | regulation of cellular carbohydrate metabolic process               | -4.8494  |
| GO:00302<br>60 | entry into host cell                                                | -4.8494  |
| GO:00444<br>09 | entry into host                                                     | -4.8494  |
| GO:00518<br>06 | entry into cell of other organism involved in symbiotic interaction | -4.8494  |
| GO:00518<br>28 | entry into other organism involved in symbiotic interaction         | -4.82814 |
| GO:00706<br>46 | protein modification by small protein removal                       | -4.8244  |
| GO:00091<br>10 | vitamin biosynthetic process                                        | -4.81934 |
| GO:00108<br>93 | positive regulation of steroid biosynthetic process                 | -4.81934 |
| GO:00607<br>16 | labyrinthine layer blood vessel development                         | -4.81934 |
| GO:00714<br>98 | cellular response to fluid shear stress                             | -4.81934 |
| GO:00902<br>80 | positive regulation of calcium ion import                           | -4.81934 |
| GO:00903<br>30 | regulation of platelet aggregation                                  | -4.81934 |
| GO:00447<br>74 | mitotic DNA integrity checkpoint                                    | -4.81788 |
| GO:00330<br>44 | regulation of chromosome organization                               | -4.81414 |
| GO:01500<br>77 | regulation of neuroinflammatory response                            | -4.8126  |
| GO:19033<br>64 | positive regulation of cellular protein catabolic process           | -4.80704 |
| GO:00022<br>86 | T cell activation involved in immune response                       | -4.79173 |
| GO:00217<br>61 | limbic system development                                           | -4.79173 |
| GO:00000<br>77 | DNA damage checkpoint                                               | -4.78611 |
| GO:00347<br>65 | regulation of ion transmembrane transport                           | -4.78049 |
| GO:19019<br>89 | positive regulation of cell cycle phase transition                  | -4.76585 |

|                |                                                         |          |
|----------------|---------------------------------------------------------|----------|
| GO:00020<br>40 | sprouting angiogenesis                                  | -4.76436 |
| GO:19055<br>21 | regulation of macrophage migration                      | -4.76279 |
| GO:00316<br>70 | cellular response to nutrient                           | -4.75586 |
| GO:00163<br>11 | dephosphorylation                                       | -4.75112 |
| GO:00160<br>52 | carbohydrate catabolic process                          | -4.74709 |
| GO:00482<br>59 | regulation of receptor-mediated endocytosis             | -4.74024 |
| GO:00329<br>28 | regulation of superoxide anion generation               | -4.73468 |
| GO:00423<br>59 | vitamin D metabolic process                             | -4.73468 |
| GO:00483<br>05 | immunoglobulin secretion                                | -4.73468 |
| GO:00510<br>00 | positive regulation of nitric-oxide synthase activity   | -4.73468 |
| GO:19028<br>84 | positive regulation of response to oxidative stress     | -4.73468 |
| GO:19011<br>37 | carbohydrate derivative biosynthetic process            | -4.72868 |
| GO:00456<br>85 | regulation of glial cell differentiation                | -4.72229 |
| GO:00108<br>28 | positive regulation of glucose transmembrane transport  | -4.71422 |
| GO:00604<br>43 | mammary gland morphogenesis                             | -4.71422 |
| GO:00097<br>55 | hormone-mediated signaling pathway                      | -4.71285 |
| GO:00487<br>54 | branching morphogenesis of an epithelial tube           | -4.70394 |
| GO:00508<br>08 | synapse organization                                    | -4.69043 |
| GO:00059<br>76 | polysaccharide metabolic process                        | -4.68979 |
| GO:00620<br>14 | negative regulation of small molecule metabolic process | -4.68979 |
| GO:00226<br>04 | regulation of cell morphogenesis                        | -4.68349 |
| GO:00902<br>57 | regulation of muscle system process                     | -4.68076 |

|                |                                                                                    |          |
|----------------|------------------------------------------------------------------------------------|----------|
| GO:00605<br>41 | respiratory system development                                                     | -4.67901 |
| GO:00019<br>55 | blood vessel maturation                                                            | -4.67586 |
| GO:00022<br>46 | wound healing involved in inflammatory response                                    | -4.67586 |
| GO:00316<br>20 | regulation of fever generation                                                     | -4.67586 |
| GO:00331<br>29 | positive regulation of histone phosphorylation                                     | -4.67586 |
| GO:00356<br>55 | interleukin-18-mediated signaling pathway                                          | -4.67586 |
| GO:00713<br>51 | cellular response to interleukin-18                                                | -4.67586 |
| GO:01200<br>40 | regulation of macrophage proliferation                                             | -4.67586 |
| GO:19001<br>25 | regulation of hyaluronan biosynthetic process                                      | -4.67586 |
| GO:00433<br>30 | response to exogenous dsRNA                                                        | -4.66682 |
| GO:00485<br>38 | thymus development                                                                 | -4.66682 |
| GO:00074<br>22 | peripheral nervous system development                                              | -4.65661 |
| GO:00614<br>18 | regulation of transcription from RNA polymerase II promoter in response to hypoxia | -4.65661 |
| GO:00102<br>88 | response to lead ion                                                               | -4.6542  |
| GO:00357<br>43 | CD4-positive, alpha-beta T cell cytokine production                                | -4.6542  |
| GO:00326<br>09 | interferon-gamma production                                                        | -4.64034 |
| GO:00506<br>88 | regulation of defense response to virus                                            | -4.62449 |
| GO:00076<br>11 | learning or memory                                                                 | -4.62318 |
| GO:00421<br>80 | cellular ketone metabolic process                                                  | -4.62318 |
| GO:19033<br>62 | regulation of cellular protein catabolic process                                   | -4.62318 |
| GO:00305<br>74 | collagen catabolic process                                                         | -4.62055 |
| GO:00357<br>22 | interleukin-12-mediated signaling pathway                                          | -4.62055 |



|                |                                                             |          |
|----------------|-------------------------------------------------------------|----------|
| GO:00466<br>20 | regulation of organ growth                                  | -4.61599 |
| GO:19029<br>05 | positive regulation of supramolecular fiber organization    | -4.6125  |
| GO:00353<br>03 | regulation of dephosphorylation                             | -4.59611 |
| GO:00310<br>16 | pancreas development                                        | -4.59282 |
| GO:00996<br>01 | regulation of neurotransmitter receptor activity            | -4.59282 |
| GO:00507<br>07 | regulation of cytokine secretion                            | -4.59187 |
| GO:00007<br>23 | telomere maintenance                                        | -4.58519 |
| GO:00315<br>70 | DNA integrity checkpoint                                    | -4.58519 |
| GO:20000<br>58 | regulation of ubiquitin-dependent protein catabolic process | -4.58519 |
| GO:00427<br>38 | exogenous drug catabolic process                            | -4.57751 |
| GO:00509<br>95 | negative regulation of lipid catabolic process              | -4.57751 |
| GO:00107<br>99 | regulation of peptidyl-threonine phosphorylation            | -4.57536 |
| GO:00305<br>18 | intracellular steroid hormone receptor signaling pathway    | -4.56799 |
| GO:00358<br>21 | modification of morphology or physiology of other organism  | -4.5659  |
| GO:00023<br>77 | immunoglobulin production                                   | -4.5636  |
| GO:00488<br>63 | stem cell differentiation                                   | -4.55271 |
| GO:00902<br>76 | regulation of peptide hormone secretion                     | -4.53146 |
| GO:00020<br>67 | glandular epithelial cell differentiation                   | -4.53119 |
| GO:00032<br>54 | regulation of membrane depolarization                       | -4.53119 |
| GO:00456<br>01 | regulation of endothelial cell differentiation              | -4.53119 |
| GO:00607<br>11 | labyrinthine layer development                              | -4.53119 |
| GO:00713<br>49 | cellular response to interleukin-12                         | -4.53119 |

|            |                                                                                |          |
|------------|--------------------------------------------------------------------------------|----------|
| GO:2000107 | negative regulation of leukocyte apoptotic process                             | -4.53119 |
| GO:0021766 | hippocampus development                                                        | -4.5308  |
| GO:0006006 | glucose metabolic process                                                      | -4.51553 |
| GO:1903305 | regulation of regulated secretory pathway                                      | -4.50885 |
| GO:0032647 | regulation of interferon-alpha production                                      | -4.50428 |
| GO:0046697 | decidualization                                                                | -4.50428 |
| GO:0060571 | morphogenesis of an epithelial fold                                            | -4.50428 |
| GO:1904385 | cellular response to angiotensin                                               | -4.50428 |
| GO:2001026 | regulation of endothelial cell chemotaxis                                      | -4.50428 |
| GO:0051121 | hepoxilin metabolic process                                                    | -4.50212 |
| GO:0051122 | hepoxilin biosynthetic process                                                 | -4.50212 |
| GO:0060556 | regulation of vitamin D biosynthetic process                                   | -4.50212 |
| GO:0097011 | cellular response to granulocyte macrophage colony-stimulating factor stimulus | -4.50212 |
| GO:0097012 | response to granulocyte macrophage colony-stimulating factor                   | -4.50212 |
| GO:1901857 | positive regulation of cellular respiration                                    | -4.50212 |
| GO:2001280 | positive regulation of unsaturated fatty acid biosynthetic process             | -4.50212 |
| GO:0010906 | regulation of glucose metabolic process                                        | -4.4977  |
| GO:0021987 | cerebral cortex development                                                    | -4.4977  |
| GO:0001774 | microglial cell activation                                                     | -4.48801 |
| GO:0002269 | leukocyte activation involved in inflammatory response                         | -4.48801 |
| GO:0002833 | positive regulation of response to biotic stimulus                             | -4.48801 |
| GO:0014009 | glial cell proliferation                                                       | -4.48801 |

|                |                                                                                                              |          |
|----------------|--------------------------------------------------------------------------------------------------------------|----------|
| GO:00301<br>95 | negative regulation of blood coagulation                                                                     | -4.48801 |
| GO:00706<br>71 | response to interleukin-12                                                                                   | -4.48801 |
| GO:00427<br>52 | regulation of circadian rhythm                                                                               | -4.47471 |
| GO:19902<br>66 | neutrophil migration                                                                                         | -4.45193 |
| GO:00311<br>13 | regulation of microtubule polymerization                                                                     | -4.44578 |
| GO:00322<br>06 | positive regulation of telomere maintenance                                                                  | -4.44578 |
| GO:00713<br>54 | cellular response to interleukin-6                                                                           | -4.44578 |
| GO:00716<br>75 | regulation of mononuclear cell migration                                                                     | -4.44578 |
| GO:19000<br>47 | negative regulation of hemostasis                                                                            | -4.44578 |
| GO:00345<br>02 | protein localization to chromosome                                                                           | -4.44093 |
| GO:00607<br>40 | prostate gland epithelium morphogenesis                                                                      | -4.43422 |
| GO:19007<br>39 | regulation of protein insertion into mitochondrial membrane involved in apoptotic signaling pathway          | -4.43422 |
| GO:19007<br>40 | positive regulation of protein insertion into mitochondrial membrane involved in apoptotic signaling pathway | -4.43422 |
| GO:19055<br>23 | positive regulation of macrophage migration                                                                  | -4.43422 |
| GO:00459<br>27 | positive regulation of growth                                                                                | -4.42984 |
| GO:00320<br>92 | positive regulation of protein binding                                                                       | -4.41178 |
| GO:00705<br>09 | calcium ion import                                                                                           | -4.41178 |
| GO:00324<br>79 | regulation of type I interferon production                                                                   | -4.40702 |
| GO:00069<br>98 | nuclear envelope organization                                                                                | -4.40445 |
| GO:00068<br>98 | receptor-mediated endocytosis                                                                                | -4.39848 |
| GO:00486<br>67 | cell morphogenesis involved in neuron differentiation                                                        | -4.36864 |

|            |                                                              |          |
|------------|--------------------------------------------------------------|----------|
| GO:0001963 | synaptic transmission, dopaminergic                          | -4.36707 |
| GO:0010971 | positive regulation of G2/M transition of mitotic cell cycle | -4.36707 |
| GO:0032607 | interferon-alpha production                                  | -4.36707 |
| GO:0034114 | regulation of heterotypic cell-cell adhesion                 | -4.36707 |
| GO:0034698 | response to gonadotropin                                     | -4.36707 |
| GO:0042501 | serine phosphorylation of STAT protein                       | -4.36707 |
| GO:2000353 | positive regulation of endothelial cell apoptotic process    | -4.36707 |
| GO:0043331 | response to dsRNA                                            | -4.36399 |
| GO:0048260 | positive regulation of receptor-mediated endocytosis         | -4.36399 |
| GO:0032606 | type I interferon production                                 | -4.36292 |
| GO:0050954 | sensory perception of mechanical stimulus                    | -4.36246 |
| GO:0010507 | negative regulation of autophagy                             | -4.3546  |
| GO:0034637 | cellular carbohydrate biosynthetic process                   | -4.3546  |
| GO:0048013 | ephrin receptor signaling pathway                            | -4.3546  |
| GO:0051781 | positive regulation of cell division                         | -4.3546  |
| GO:0060070 | canonical Wnt signaling pathway                              | -4.35192 |
| GO:0001660 | fever generation                                             | -4.34957 |
| GO:0032308 | positive regulation of prostaglandin secretion               | -4.34957 |
| GO:0034350 | regulation of glial cell apoptotic process                   | -4.34957 |
| GO:0036500 | ATF6-mediated unfolded protein response                      | -4.34957 |
| GO:0045348 | positive regulation of MHC class II biosynthetic process     | -4.34957 |
| GO:0051541 | elastin metabolic process                                    | -4.34957 |

|            |                                                                                      |          |
|------------|--------------------------------------------------------------------------------------|----------|
| GO:0051901 | positive regulation of mitochondrial depolarization                                  | -4.34957 |
| GO:0060068 | vagina development                                                                   | -4.34957 |
| GO:0070424 | regulation of nucleotide-binding oligomerization domain containing signaling pathway | -4.34957 |
| GO:0097267 | omega-hydroxylase P450 pathway                                                       | -4.34957 |
| GO:0032200 | telomere organization                                                                | -4.34472 |
| GO:1903052 | positive regulation of proteolysis involved in cellular protein catabolic process    | -4.34116 |
| GO:0017157 | regulation of exocytosis                                                             | -4.33097 |
| GO:1903050 | regulation of proteolysis involved in cellular protein catabolic process             | -4.33097 |
| GO:0006749 | glutathione metabolic process                                                        | -4.32437 |
| GO:0010524 | positive regulation of calcium ion transport into cytosol                            | -4.32437 |
| GO:0019058 | viral life cycle                                                                     | -4.31745 |
| GO:0032970 | regulation of actin filament-based process                                           | -4.30526 |
| GO:0030194 | positive regulation of blood coagulation                                             | -4.30262 |
| GO:0060512 | prostate gland morphogenesis                                                         | -4.30262 |
| GO:0071280 | cellular response to copper ion                                                      | -4.30262 |
| GO:1900048 | positive regulation of hemostasis                                                    | -4.30262 |
| GO:1902932 | positive regulation of alcohol biosynthetic process                                  | -4.30262 |
| GO:0001822 | kidney development                                                                   | -4.29898 |
| GO:0007411 | axon guidance                                                                        | -4.29898 |
| GO:0034101 | erythrocyte homeostasis                                                              | -4.29824 |
| GO:0071482 | cellular response to light stimulus                                                  | -4.29824 |
| GO:0090150 | establishment of protein localization to membrane                                    | -4.29468 |

|                |                                                                                  |          |
|----------------|----------------------------------------------------------------------------------|----------|
| GO:00974<br>85 | neuron projection guidance                                                       | -4.2862  |
| GO:00162<br>33 | telomere capping                                                                 | -4.28555 |
| GO:00508<br>19 | negative regulation of coagulation                                               | -4.28555 |
| GO:00707<br>41 | response to interleukin-6                                                        | -4.28555 |
| GO:00069<br>19 | activation of cysteine-type endopeptidase activity involved in apoptotic process | -4.27155 |
| GO:00484<br>69 | cell maturation                                                                  | -4.25778 |
| GO:00158<br>93 | drug transport                                                                   | -4.25751 |
| GO:00506<br>63 | cytokine secretion                                                               | -4.25607 |
| GO:00702<br>28 | regulation of lymphocyte apoptotic process                                       | -4.24751 |
| GO:00508<br>20 | positive regulation of coagulation                                               | -4.24065 |
| GO:00509<br>01 | leukocyte tethering or rolling                                                   | -4.24065 |
| GO:19040<br>62 | regulation of cation transmembrane transport                                     | -4.23848 |
| GO:00507<br>96 | regulation of insulin secretion                                                  | -4.22381 |
| GO:00455<br>82 | positive regulation of T cell differentiation                                    | -4.2179  |
| GO:00022<br>75 | myeloid cell activation involved in immune response                              | -4.21734 |
| GO:00065<br>27 | arginine catabolic process                                                       | -4.21362 |
| GO:00316<br>52 | positive regulation of heat generation                                           | -4.21362 |
| GO:00323<br>06 | regulation of prostaglandin secretion                                            | -4.21362 |
| GO:00331<br>97 | response to vitamin E                                                            | -4.21362 |
| GO:00605<br>25 | prostate glandular acinus development                                            | -4.21362 |
| GO:00706<br>73 | response to interleukin-18                                                       | -4.21362 |
| GO:00074<br>09 | axonogenesis                                                                     | -4.21266 |

|            |                                                                   |          |
|------------|-------------------------------------------------------------------|----------|
| GO:0045840 | positive regulation of mitotic nuclear division                   | -4.21021 |
| GO:0002705 | positive regulation of leukocyte mediated immunity                | -4.19418 |
| GO:0072001 | renal system development                                          | -4.18596 |
| GO:0001516 | prostaglandin biosynthetic process                                | -4.18099 |
| GO:0005979 | regulation of glycogen biosynthetic process                       | -4.18099 |
| GO:0007176 | regulation of epidermal growth factor-activated receptor activity | -4.18099 |
| GO:0010758 | regulation of macrophage chemotaxis                               | -4.18099 |
| GO:0010962 | regulation of glucan biosynthetic process                         | -4.18099 |
| GO:0034110 | regulation of homotypic cell-cell adhesion                        | -4.18099 |
| GO:0046457 | prostanoid biosynthetic process                                   | -4.18099 |
| GO:0071480 | cellular response to gamma radiation                              | -4.18099 |
| GO:1902751 | positive regulation of cell cycle G2/M phase transition           | -4.18099 |
| GO:1903205 | regulation of hydrogen peroxide-induced cell death                | -4.18099 |
| GO:2001025 | positive regulation of response to drug                           | -4.18099 |
| GO:0006766 | vitamin metabolic process                                         | -4.1739  |
| GO:0055076 | transition metal ion homeostasis                                  | -4.1739  |
| GO:0022900 | electron transport chain                                          | -4.17367 |
| GO:1903793 | positive regulation of anion transport                            | -4.17363 |
| GO:0002444 | myeloid leukocyte mediated immunity                               | -4.16733 |
| GO:0044262 | cellular carbohydrate metabolic process                           | -4.16143 |
| GO:1901888 | regulation of cell junction assembly                              | -4.13985 |
| GO:0051480 | regulation of cytosolic calcium ion concentration                 | -4.13984 |

|            |                                                                                             |          |
|------------|---------------------------------------------------------------------------------------------|----------|
| GO:0017001 | antibiotic catabolic process                                                                | -4.13775 |
| GO:0014044 | Schwann cell development                                                                    | -4.12348 |
| GO:0045940 | positive regulation of steroid metabolic process                                            | -4.12348 |
| GO:0002690 | positive regulation of leukocyte chemotaxis                                                 | -4.11445 |
| GO:0010660 | regulation of muscle cell apoptotic process                                                 | -4.11445 |
| GO:0002433 | immune response-regulating cell surface receptor signaling pathway involved in phagocytosis | -4.11409 |
| GO:0035304 | regulation of protein dephosphorylation                                                     | -4.11409 |
| GO:0038096 | Fc-gamma receptor signaling pathway involved in phagocytosis                                | -4.11409 |
| GO:0032956 | regulation of actin cytoskeleton organization                                               | -4.10765 |
| GO:0032653 | regulation of interleukin-10 production                                                     | -4.10253 |
| GO:0043388 | positive regulation of DNA binding                                                          | -4.10253 |
| GO:0006983 | ER overload response                                                                        | -4.09103 |
| GO:0031392 | regulation of prostaglandin biosynthetic process                                            | -4.09103 |
| GO:0043696 | dedifferentiation                                                                           | -4.09103 |
| GO:0043697 | cell dedifferentiation                                                                      | -4.09103 |
| GO:0060736 | prostate gland growth                                                                       | -4.09103 |
| GO:0060742 | epithelial cell differentiation involved in prostate gland development                      | -4.09103 |
| GO:0061517 | macrophage proliferation                                                                    | -4.09103 |
| GO:0072584 | caveolin-mediated endocytosis                                                               | -4.09103 |
| GO:1904181 | positive regulation of membrane depolarization                                              | -4.09103 |
| GO:0030308 | negative regulation of cell growth                                                          | -4.07623 |
| GO:00705   | regulation of microtubule cytoskeleton                                                      | -4.07623 |



|            |                                                                |          |
|------------|----------------------------------------------------------------|----------|
| 07         | organization                                                   |          |
| GO:0035767 | endothelial cell chemotaxis                                    | -4.06797 |
| GO:0050869 | negative regulation of B cell activation                       | -4.06797 |
| GO:0051968 | positive regulation of synaptic transmission, glutamatergic    | -4.06797 |
| GO:0071353 | cellular response to interleukin-4                             | -4.06797 |
| GO:0097421 | liver regeneration                                             | -4.06797 |
| GO:0010574 | regulation of vascular endothelial growth factor production    | -4.06796 |
| GO:0031343 | positive regulation of cell killing                            | -4.06796 |
| GO:1903078 | positive regulation of protein localization to plasma membrane | -4.06796 |
| GO:0048167 | regulation of synaptic plasticity                              | -4.06035 |
| GO:0038094 | Fc-gamma receptor signaling pathway                            | -4.05575 |
| GO:0002449 | lymphocyte mediated immunity                                   | -4.04429 |
| GO:0010657 | muscle cell apoptotic process                                  | -4.01578 |
| GO:0050848 | regulation of calcium-mediated signaling                       | -4.01578 |
| GO:0001975 | response to amphetamine                                        | -4.01434 |
| GO:0002861 | regulation of inflammatory response to antigenic stimulus      | -4.01434 |
| GO:0010039 | response to iron ion                                           | -4.01434 |
| GO:0042573 | retinoic acid metabolic process                                | -4.01434 |
| GO:2001038 | regulation of cellular response to drug                        | -4.01434 |
| GO:0021885 | forebrain cell migration                                       | -4.00068 |
| GO:0032613 | interleukin-10 production                                      | -4.00068 |
| GO:0034113 | heterotypic cell-cell adhesion                                 | -4.00068 |

|            |                                                                                    |          |          |
|------------|------------------------------------------------------------------------------------|----------|----------|
| GO:0070059 | intrinsic apoptotic signaling pathway in response to endoplasmic reticulum stress  | -4.00068 |          |
| GO:0002431 | Fc receptor mediated stimulatory signaling pathway                                 | -3.99883 |          |
| GO:0007612 | learning                                                                           |          | -3.99883 |
| GO:0007423 | sensory organ development                                                          | -3.99789 |          |
| GO:0002702 | positive regulation of production of molecular mediator of immune response         | -3.99181 |          |
| GO:0031650 | regulation of heat generation                                                      | -3.97944 |          |
| GO:0032725 | positive regulation of granulocyte macrophage colony-stimulating factor production | -3.97944 |          |
| GO:0033127 | regulation of histone phosphorylation                                              | -3.97944 |          |
| GO:0045741 | positive regulation of epidermal growth factor-activated receptor activity         | -3.97944 |          |
| GO:0051988 | regulation of attachment of spindle microtubules to kinetochore                    | -3.97944 |          |
| GO:0060340 | positive regulation of type I interferon-mediated signaling pathway                | -3.97944 |          |
| GO:0072683 | T cell extravasation                                                               | -3.97944 |          |
| GO:0002437 | inflammatory response to antigenic stimulus                                        | -3.96792 |          |
| GO:0030431 | sleep                                                                              |          | -3.96247 |
| GO:0032148 | activation of protein kinase B activity                                            | -3.96247 |          |
| GO:0033198 | response to ATP                                                                    | -3.96247 |          |
| GO:0036474 | cell death in response to hydrogen peroxide                                        | -3.96247 |          |
| GO:0043276 | anoikis                                                                            |          | -3.96247 |
| GO:0045907 | positive regulation of vasoconstriction                                            | -3.96247 |          |
| GO:0071901 | negative regulation of protein serine/threonine kinase activity                    | -3.94326 |          |
| GO:00075   | excretion                                                                          |          | -        |

|                |                                                                             |          |             |
|----------------|-----------------------------------------------------------------------------|----------|-------------|
| 88             |                                                                             |          | 3.9357<br>3 |
| GO:00316<br>40 | killing of cells of other organism                                          | -3.93573 |             |
| GO:00443<br>64 | disruption of cells of other organism                                       | -3.93573 |             |
| GO:00103<br>89 | regulation of G2/M transition of mitotic cell cycle                         | -3.92171 |             |
| GO:00074<br>35 | salivary gland morphogenesis                                                | -3.91225 |             |
| GO:00606<br>74 | placenta blood vessel development                                           | -3.91225 |             |
| GO:00706<br>70 | response to interleukin-4                                                   | -3.91225 |             |
| GO:19036<br>70 | regulation of sprouting angiogenesis                                        | -3.90694 |             |
| GO:00995<br>04 | synaptic vesicle cycle                                                      | -3.90677 |             |
| GO:00300<br>72 | peptide hormone secretion                                                   | -3.90433 |             |
| GO:00343<br>30 | cell junction organization                                                  | -3.89341 |             |
| GO:00508<br>71 | positive regulation of B cell activation                                    | -3.889   |             |
| GO:00148<br>54 | response to inactivity                                                      | -3.87705 |             |
| GO:00704<br>31 | nucleotide-binding oligomerization domain<br>containing 2 signaling pathway | -3.87705 |             |
| GO:20012<br>79 | regulation of unsaturated fatty acid biosynthetic<br>process                | -3.87705 |             |
| GO:00064<br>17 | regulation of translation                                                   | -3.8744  |             |
| GO:00509<br>18 | positive chemotaxis                                                         | -3.87297 |             |
| GO:00726<br>78 | T cell migration                                                            | -3.87297 |             |
| GO:19036<br>72 | positive regulation of sprouting angiogenesis                               | -3.87297 |             |
| GO:00337<br>62 | response to glucagon                                                        | -3.86359 |             |
| GO:00708<br>73 | regulation of glycogen metabolic process                                    | -3.86359 |             |
| GO:20003<br>10 | regulation of NMDA receptor activity                                        | -3.86359 |             |

|                |                                                                           |          |
|----------------|---------------------------------------------------------------------------|----------|
| GO:00519<br>83 | regulation of chromosome segregation                                      | -3.85345 |
| GO:00072<br>04 | positive regulation of cytosolic calcium ion concentration                | -3.84928 |
| GO:00507<br>66 | positive regulation of phagocytosis                                       | -3.84238 |
| GO:19043<br>77 | positive regulation of protein localization to cell periphery             | -3.84238 |
| GO:00027<br>06 | regulation of lymphocyte mediated immunity                                | -3.83598 |
| GO:00300<br>38 | contractile actin filament bundle assembly                                | -3.83126 |
| GO:00431<br>49 | stress fiber assembly                                                     | -3.83126 |
| GO:00614<br>48 | connective tissue development                                             | -3.81667 |
| GO:00972<br>42 | amyloid-beta clearance                                                    | -3.81638 |
| GO:00323<br>70 | positive regulation of lipid transport                                    | -3.81228 |
| GO:00019<br>09 | leukocyte mediated cytotoxicity                                           | -3.80929 |
| GO:00510<br>48 | negative regulation of secretion                                          | -3.79036 |
| GO:00511<br>87 | cofactor catabolic process                                                | -3.78266 |
| GO:00060<br>00 | fructose metabolic process                                                | -3.78249 |
| GO:00107<br>63 | positive regulation of fibroblast migration                               | -3.78249 |
| GO:00326<br>45 | regulation of granulocyte macrophage colony-stimulating factor production | -3.78249 |
| GO:00453<br>46 | regulation of MHC class II biosynthetic process                           | -3.78249 |
| GO:00483<br>08 | organelle inheritance                                                     | -3.78249 |
| GO:00483<br>13 | Golgi inheritance                                                         | -3.78249 |
| GO:00905<br>57 | establishment of endothelial intestinal barrier                           | -3.78249 |
| GO:00107<br>42 | macrophage derived foam cell differentiation                              | -3.77056 |
| GO:00430<br>29 | T cell homeostasis                                                        | -3.77056 |

|            |                                                                  |          |
|------------|------------------------------------------------------------------|----------|
| GO:0048009 | insulin-like growth factor receptor signaling pathway            | -3.77056 |
| GO:0090077 | foam cell differentiation                                        | -3.77056 |
| GO:0006839 | mitochondrial transport                                          | -3.76786 |
| GO:0043271 | negative regulation of ion transport                             | -3.76715 |
| GO:0060968 | regulation of gene silencing                                     | -3.76715 |
| GO:0042303 | molting cycle                                                    | -3.76605 |
| GO:0042633 | hair cycle                                                       | -3.76605 |
| GO:0031396 | regulation of protein ubiquitination                             | -3.76209 |
| GO:0043043 | peptide biosynthetic process                                     | -3.7609  |
| GO:0014823 | response to activity                                             | -3.75351 |
| GO:0051785 | positive regulation of nuclear division                          | -3.75351 |
| GO:0035051 | cardiocyte differentiation                                       | -3.75026 |
| GO:0006275 | regulation of DNA replication                                    | -3.74476 |
| GO:0030073 | insulin secretion                                                | -3.73415 |
| GO:0030258 | lipid modification                                               | -3.73184 |
| GO:0043299 | leukocyte degranulation                                          | -3.73165 |
| GO:0032660 | regulation of interleukin-17 production                          | -3.72605 |
| GO:0042092 | type 2 immune response                                           | -3.72605 |
| GO:0043114 | regulation of vascular permeability                              | -3.72605 |
| GO:0060416 | response to growth hormone                                       | -3.72605 |
| GO:1904706 | negative regulation of vascular smooth muscle cell proliferation | -3.72605 |
| GO:19044   | positive regulation of calcium ion                               | -3.72483 |

|            |                                                                        |          |
|------------|------------------------------------------------------------------------|----------|
| 27         | transmembrane transport                                                |          |
| GO:0051656 | establishment of organelle localization                                | -3.71603 |
| GO:0016485 | protein processing                                                     | -3.71052 |
| GO:0046916 | cellular transition metal ion homeostasis                              | -3.70284 |
| GO:0016570 | histone modification                                                   | -3.70064 |
| GO:0048285 | organelle fission                                                      | -3.70064 |
| GO:1903747 | regulation of establishment of protein localization to mitochondrion   | -3.69658 |
| GO:0032604 | granulocyte macrophage colony-stimulating factor production            | -3.69466 |
| GO:0045342 | MHC class II biosynthetic process                                      | -3.69466 |
| GO:0045725 | positive regulation of glycogen biosynthetic process                   | -3.69466 |
| GO:0071732 | cellular response to nitric oxide                                      | -3.69466 |
| GO:0031214 | biomineral tissue development                                          | -3.68394 |
| GO:0006730 | one-carbon metabolic process                                           | -3.68278 |
| GO:0007257 | activation of JUN kinase activity                                      | -3.68278 |
| GO:0032892 | positive regulation of organic acid transport                          | -3.68278 |
| GO:0045746 | negative regulation of Notch signaling pathway                         | -3.68278 |
| GO:0051281 | positive regulation of release of sequestered calcium ion into cytosol | -3.68278 |
| GO:1902749 | regulation of cell cycle G2/M phase transition                         | -3.67921 |
| GO:0032481 | positive regulation of type I interferon production                    | -3.66876 |
| GO:0043507 | positive regulation of JUN kinase activity                             | -3.66876 |
| GO:1902117 | positive regulation of organelle assembly                              | -3.66876 |
| GO:1903828 | negative regulation of cellular protein localization                   | -3.66175 |

|            |                                                                                      |          |
|------------|--------------------------------------------------------------------------------------|----------|
| GO:0007517 | muscle organ development                                                             | -3.65343 |
| GO:0030282 | bone mineralization                                                                  | -3.64151 |
| GO:0072676 | lymphocyte migration                                                                 | -3.64151 |
| GO:0030890 | positive regulation of B cell proliferation                                          | -3.64068 |
| GO:0016042 | lipid catabolic process                                                              | -3.6285  |
| GO:0031330 | negative regulation of cellular catabolic process                                    | -3.62668 |
| GO:0050868 | negative regulation of T cell activation                                             | -3.62147 |
| GO:0002429 | immune response-activating cell surface receptor signaling pathway                   | -3.61741 |
| GO:0009064 | glutamine family amino acid metabolic process                                        | -3.61438 |
| GO:1900076 | regulation of cellular response to insulin stimulus                                  | -3.61438 |
| GO:0030889 | negative regulation of B cell proliferation                                          | -3.61268 |
| GO:0030949 | positive regulation of vascular endothelial growth factor receptor signaling pathway | -3.61268 |
| GO:0031649 | heat generation                                                                      | -3.61268 |
| GO:0032305 | positive regulation of eicosanoid secretion                                          | -3.61268 |
| GO:0033599 | regulation of mammary gland epithelial cell proliferation                            | -3.61268 |
| GO:0035729 | cellular response to hepatocyte growth factor stimulus                               | -3.61268 |
| GO:0045986 | negative regulation of smooth muscle contraction                                     | -3.61268 |
| GO:0050665 | hydrogen peroxide biosynthetic process                                               | -3.61268 |
| GO:0070875 | positive regulation of glycogen metabolic process                                    | -3.61268 |
| GO:1903209 | positive regulation of oxidative stress-induced cell death                           | -3.61268 |
| GO:0006836 | neurotransmitter transport                                                           | -3.60389 |
| GO:0097479 | synaptic vesicle localization                                                        | -3.6037  |

|                |                                                                        |          |
|----------------|------------------------------------------------------------------------|----------|
| GO:00109<br>07 | positive regulation of glucose metabolic process                       | -3.59969 |
| GO:00330<br>48 | negative regulation of mitotic sister chromatid segregation            | -3.59969 |
| GO:00328<br>86 | regulation of microtubule-based process                                | -3.59906 |
| GO:00165<br>69 | covalent chromatin modification                                        | -3.5929  |
| GO:00025<br>26 | acute inflammatory response                                            | -3.58596 |
| GO:00601<br>47 | regulation of posttranscriptional gene silencing                       | -3.58197 |
| GO:00609<br>66 | regulation of gene silencing by RNA                                    | -3.58197 |
| GO:00456<br>65 | negative regulation of neuron differentiation                          | -3.57293 |
| GO:00600<br>47 | heart contraction                                                      | -3.57007 |
| GO:00070<br>52 | mitotic spindle organization                                           | -3.56251 |
| GO:00331<br>43 | regulation of intracellular steroid hormone receptor signaling pathway | -3.56158 |
| GO:00467<br>85 | microtubule polymerization                                             | -3.56158 |
| GO:00723<br>32 | intrinsic apoptotic signaling pathway by p53 class mediator            | -3.56158 |
| GO:00019<br>53 | negative regulation of cell-matrix adhesion                            | -3.55977 |
| GO:00023<br>69 | T cell cytokine production                                             | -3.55977 |
| GO:00157<br>01 | bicarbonate transport                                                  | -3.55977 |
| GO:00189<br>04 | ether metabolic process                                                | -3.53585 |
| GO:00331<br>94 | response to hydroperoxide                                              | -3.53585 |
| GO:00451<br>87 | regulation of circadian sleep/wake cycle, sleep                        | -3.53585 |
| GO:00612<br>98 | retina vasculature development in camera-type eye                      | -3.53585 |
| GO:00713<br>18 | cellular response to ATP                                               | -3.53585 |
| GO:20006<br>41 | regulation of early endosome to late endosome transport                | -3.53585 |



|                |                                                     |          |
|----------------|-----------------------------------------------------|----------|
| GO:20011<br>70 | negative regulation of ATP biosynthetic process     | -3.53585 |
| GO:00422<br>46 | tissue regeneration                                 | -3.53575 |
| GO:00603<br>95 | SMAD protein signal transduction                    | -3.53575 |
| GO:19000<br>34 | regulation of cellular response to heat             | -3.53575 |
| GO:00991<br>73 | postsynapse organization                            | -3.52624 |
| GO:00508<br>07 | regulation of synapse organization                  | -3.52151 |
| GO:00326<br>20 | interleukin-17 production                           | -3.52086 |
| GO:00330<br>46 | negative regulation of sister chromatid segregation | -3.52086 |
| GO:00353<br>07 | positive regulation of protein dephosphorylation    | -3.52086 |
| GO:00456<br>87 | positive regulation of glial cell differentiation   | -3.52086 |
| GO:00002<br>80 | nuclear division                                    | -3.51087 |
| GO:00023<br>12 | B cell activation involved in immune response       | -3.51029 |
| GO:20003<br>00 | regulation of synaptic vesicle exocytosis           | -3.51029 |
| GO:00514<br>95 | positive regulation of cytoskeleton organization    | -3.50882 |
| GO:00026<br>98 | negative regulation of immune effector process      | -3.50521 |
| GO:00322<br>71 | regulation of protein polymerization                | -3.49621 |
| GO:00030<br>14 | renal system process                                | -3.48647 |
| GO:00352<br>70 | endocrine system development                        | -3.48647 |
| GO:00019<br>74 | blood vessel remodeling                             | -3.48291 |
| GO:00067<br>75 | fat-soluble vitamin metabolic process               | -3.48291 |
| GO:00341<br>98 | cellular response to amino acid starvation          | -3.48291 |
| GO:00519<br>85 | negative regulation of chromosome segregation       | -3.48291 |

|            |                                                                             |          |
|------------|-----------------------------------------------------------------------------|----------|
| GO:0002862 | negative regulation of inflammatory response to antigenic stimulus          | -3.46356 |
| GO:0010759 | positive regulation of macrophage chemotaxis                                | -3.46356 |
| GO:0034393 | positive regulation of smooth muscle cell apoptotic process                 | -3.46356 |
| GO:0035728 | response to hepatocyte growth factor                                        | -3.46356 |
| GO:0060252 | positive regulation of glial cell proliferation                             | -3.46356 |
| GO:1902170 | cellular response to reactive nitrogen species                              | -3.46356 |
| GO:0002446 | neutrophil mediated immunity                                                | -3.45001 |
| GO:0002639 | positive regulation of immunoglobulin production                            | -3.44588 |
| GO:0005978 | glycogen biosynthetic process                                               | -3.44588 |
| GO:0009250 | glucan biosynthetic process                                                 | -3.44588 |
| GO:0010761 | fibroblast migration                                                        | -3.44588 |
| GO:0010863 | positive regulation of phospholipase C activity                             | -3.44588 |
| GO:0001570 | vasculogenesis                                                              | -3.436   |
| GO:0001937 | negative regulation of endothelial cell proliferation                       | -3.436   |
| GO:0014855 | striated muscle cell proliferation                                          | -3.436   |
| GO:0060560 | developmental growth involved in morphogenesis                              | -3.43412 |
| GO:0031647 | regulation of protein stability                                             | -3.42856 |
| GO:0097061 | dendritic spine organization                                                | -3.41191 |
| GO:0007157 | heterophilic cell-cell adhesion via plasma membrane cell adhesion molecules | -3.40973 |
| GO:0032480 | negative regulation of type I interferon production                         | -3.40973 |
| GO:0045776 | negative regulation of blood pressure                                       | -3.40973 |
| GO:0070849 | response to epidermal growth factor                                         | -3.40973 |

|                |                                                                    |          |
|----------------|--------------------------------------------------------------------|----------|
| GO:00065<br>25 | arginine metabolic process                                         | -3.39532 |
| GO:00072<br>52 | I-kappaB phosphorylation                                           | -3.39532 |
| GO:00324<br>95 | response to muramyl dipeptide                                      | -3.39532 |
| GO:00327<br>27 | positive regulation of interferon-alpha production                 | -3.39532 |
| GO:00717<br>31 | response to nitric oxide                                           | -3.39532 |
| GO:20001<br>93 | positive regulation of fatty acid transport                        | -3.39532 |
| GO:00902<br>88 | negative regulation of cellular response to growth factor stimulus | -3.39334 |
| GO:20012<br>57 | regulation of cation channel activity                              | -3.39334 |
| GO:00311<br>10 | regulation of microtubule polymerization or depolymerization       | -3.38815 |
| GO:00508<br>03 | regulation of synapse structure or activity                        | -3.38561 |
| GO:00456<br>67 | regulation of osteoblast differentiation                           | -3.37757 |
| GO:00149<br>11 | positive regulation of smooth muscle cell migration                | -3.37442 |
| GO:00422<br>20 | response to cocaine                                                | -3.37442 |
| GO:19002<br>71 | regulation of long-term synaptic potentiation                      | -3.37442 |
| GO:19909<br>28 | response to amino acid starvation                                  | -3.37442 |
| GO:19035<br>22 | regulation of blood circulation                                    | -3.36586 |
| GO:00149<br>10 | regulation of smooth muscle cell migration                         | -3.3647  |
| GO:00454<br>45 | myoblast differentiation                                           | -3.3647  |
| GO:00706<br>64 | negative regulation of leukocyte proliferation                     | -3.3647  |
| GO:00977<br>56 | negative regulation of blood vessel diameter                       | -3.3647  |
| GO:19028<br>03 | regulation of synaptic vesicle transport                           | -3.3647  |
| GO:00602<br>91 | long-term synaptic potentiation                                    | -3.34155 |

|                |                                                                  |          |                  |
|----------------|------------------------------------------------------------------|----------|------------------|
| GO:00066<br>92 | prostanoid metabolic process                                     | -3.33992 |                  |
| GO:00066<br>93 | prostaglandin metabolic process                                  | -3.33992 |                  |
| GO:00075<br>95 | lactation                                                        |          | -<br>3.3399<br>2 |
| GO:00326<br>63 | regulation of interleukin-2 production                           | -3.33992 |                  |
| GO:00450<br>58 | T cell selection                                                 | -3.33992 |                  |
| GO:00485<br>12 | circadian behavior                                               | -3.33992 |                  |
| GO:19000<br>87 | positive regulation of G1/S transition of mitotic cell cycle     | -3.33992 |                  |
| GO:19002<br>74 | regulation of phospholipase C activity                           | -3.33992 |                  |
| GO:00165<br>40 | protein autoprocessing                                           | -3.33072 |                  |
| GO:00170<br>00 | antibiotic biosynthetic process                                  | -3.33072 |                  |
| GO:00307<br>28 | ovulation                                                        |          | -<br>3.3307<br>2 |
| GO:00308<br>09 | negative regulation of nucleotide biosynthetic process           | -3.33072 |                  |
| GO:00436<br>51 | linoleic acid metabolic process                                  | -3.33072 |                  |
| GO:00467<br>16 | muscle cell cellular homeostasis                                 | -3.33072 |                  |
| GO:00600<br>65 | uterus development                                               | -3.33072 |                  |
| GO:00902<br>01 | negative regulation of release of cytochrome c from mitochondria | -3.33072 |                  |
| GO:00903<br>12 | positive regulation of protein deacetylation                     | -3.33072 |                  |
| GO:19003<br>72 | negative regulation of purine nucleotide biosynthetic process    | -3.33072 |                  |
| GO:19024<br>14 | protein localization to cell junction                            | -3.33072 |                  |
| GO:20007<br>37 | negative regulation of stem cell differentiation                 | -3.33072 |                  |
| GO:00705<br>88 | calcium ion transmembrane transport                              | -3.32493 |                  |

|            |                                                                                  |          |
|------------|----------------------------------------------------------------------------------|----------|
| GO:004533  | cellular respiration                                                             | -3.32287 |
| GO:0032436 | positive regulation of proteasomal ubiquitin-dependent protein catabolic process | -3.31871 |
| GO:0070098 | chemokine-mediated signaling pathway                                             | -3.31871 |
| GO:0046718 | viral entry into host cell                                                       | -3.30815 |
| GO:0048565 | digestive tract development                                                      | -3.30815 |
| GO:0007622 | rhythmic behavior                                                                | -3.30618 |
| GO:0097300 | programmed necrotic cell death                                                   | -3.30618 |
| GO:0043506 | regulation of JUN kinase activity                                                | -3.29616 |
| GO:0010565 | regulation of cellular ketone metabolic process                                  | -3.29532 |
| GO:0048598 | embryonic morphogenesis                                                          | -3.27485 |
| GO:0032273 | positive regulation of protein polymerization                                    | -3.27434 |
| GO:0045540 | regulation of cholesterol biosynthetic process                                   | -3.27319 |
| GO:0045646 | regulation of erythrocyte differentiation                                        | -3.27319 |
| GO:0045912 | negative regulation of carbohydrate metabolic process                            | -3.27319 |
| GO:0106118 | regulation of sterol biosynthetic process                                        | -3.27319 |
| GO:1903573 | negative regulation of response to endoplasmic reticulum stress                  | -3.27319 |
| GO:0000717 | nucleotide-excision repair, DNA duplex unwinding                                 | -3.26939 |
| GO:0032700 | negative regulation of interleukin-17 production                                 | -3.26939 |
| GO:0042749 | regulation of circadian sleep/wake cycle                                         | -3.26939 |
| GO:0045655 | regulation of monocyte differentiation                                           | -3.26939 |
| GO:0050802 | circadian sleep/wake cycle, sleep                                                | -3.26939 |
| GO:0097306 | cellular response to alcohol                                                     | -3.25192 |

|            |                                                                                        |          |
|------------|----------------------------------------------------------------------------------------|----------|
| GO:0045839 | negative regulation of mitotic nuclear division                                        | -3.2409  |
| GO:0071622 | regulation of granulocyte chemotaxis                                                   | -3.2409  |
| GO:2000677 | regulation of transcription regulatory region DNA binding                              | -3.2409  |
| GO:0006644 | phospholipid metabolic process                                                         | -3.23833 |
| GO:0031058 | positive regulation of histone modification                                            | -3.23021 |
| GO:0000715 | nucleotide-excision repair, DNA damage recognition                                     | -3.21104 |
| GO:0031281 | positive regulation of cyclase activity                                                | -3.21104 |
| GO:0035162 | embryonic hemopoiesis                                                                  | -3.21104 |
| GO:0045723 | positive regulation of fatty acid biosynthetic process                                 | -3.21104 |
| GO:1900017 | positive regulation of cytokine production involved in inflammatory response           | -3.21104 |
| GO:1901032 | negative regulation of response to reactive oxygen species                             | -3.21104 |
| GO:1903077 | negative regulation of protein localization to plasma membrane                         | -3.21104 |
| GO:1903206 | negative regulation of hydrogen peroxide-induced cell death                            | -3.21104 |
| GO:2001039 | negative regulation of cellular response to drug                                       | -3.21104 |
| GO:0045599 | negative regulation of fat cell differentiation                                        | -3.2093  |
| GO:0045661 | regulation of myoblast differentiation                                                 | -3.2093  |
| GO:0014909 | smooth muscle cell migration                                                           | -3.20877 |
| GO:0045185 | maintenance of protein location                                                        | -3.20877 |
| GO:0051702 | interaction with symbiont                                                              | -3.20877 |
| GO:0051952 | regulation of amine transport                                                          | -3.20877 |
| GO:1905954 | positive regulation of lipid localization                                              | -3.20877 |
| GO:0090092 | regulation of transmembrane receptor protein serine/threonine kinase signaling pathway | -3.20115 |

|                |                                                        |          |
|----------------|--------------------------------------------------------|----------|
| GO:20000<br>27 | regulation of animal organ morphogenesis               | -3.20115 |
| GO:00072<br>92 | female gamete generation                               | -3.1923  |
| GO:00147<br>06 | striated muscle tissue development                     | -3.19206 |
| GO:00343<br>29 | cell junction assembly                                 | -3.1791  |
| GO:00096<br>20 | response to fungus                                     | -3.17835 |
| GO:00100<br>43 | response to zinc ion                                   | -3.17835 |
| GO:00326<br>23 | interleukin-2 production                               | -3.17835 |
| GO:00713<br>20 | cellular response to cAMP                              | -3.17835 |
| GO:00030<br>73 | regulation of systemic arterial blood pressure         | -3.16667 |
| GO:00603<br>37 | type I interferon signaling pathway                    | -3.16667 |
| GO:00713<br>57 | cellular response to type I interferon                 | -3.16667 |
| GO:00076<br>26 | locomotory behavior                                    | -3.16267 |
| GO:00102<br>56 | endomembrane system organization                       | -3.16095 |
| GO:01061<br>06 | cold-induced thermogenesis                             | -3.16043 |
| GO:01201<br>61 | regulation of cold-induced thermogenesis               | -3.16043 |
| GO:00508<br>51 | antigen receptor-mediated signaling pathway            | -3.15829 |
| GO:00062<br>97 | nucleotide-excision repair, DNA gap filling            | -3.15539 |
| GO:00443<br>21 | response to leptin                                     | -3.15539 |
| GO:00511<br>95 | negative regulation of cofactor metabolic process      | -3.15539 |
| GO:00603<br>96 | growth hormone receptor signaling pathway              | -3.15539 |
| GO:00604<br>44 | branching involved in mammary gland duct morphogenesis | -3.15539 |
| GO:19018<br>89 | negative regulation of cell junction assembly          | -3.15539 |

|                |                                                               |          |
|----------------|---------------------------------------------------------------|----------|
| GO:20006<br>37 | positive regulation of gene silencing by miRNA                | -3.15539 |
| GO:00029<br>31 | response to ischemia                                          | -3.14803 |
| GO:00083<br>47 | glial cell migration                                          | -3.14803 |
| GO:00466<br>31 | alpha-beta T cell activation                                  | -3.12908 |
| GO:00075<br>89 | body fluid secretion                                          | -3.12557 |
| GO:00466<br>34 | regulation of alpha-beta T cell activation                    | -3.12557 |
| GO:19908<br>68 | response to chemokine                                         | -3.12557 |
| GO:19908<br>69 | cellular response to chemokine                                | -3.12557 |
| GO:00164<br>47 | somatic recombination of immunoglobulin gene segments         | -3.11832 |
| GO:00312<br>95 | T cell costimulation                                          | -3.11832 |
| GO:00515<br>88 | regulation of neurotransmitter transport                      | -3.1136  |
| GO:19028<br>50 | microtubule cytoskeleton organization involved in mitosis     | -3.1136  |
| GO:00300<br>36 | actin cytoskeleton organization                               | -3.1115  |
| GO:00324<br>12 | regulation of ion transmembrane transporter activity          | -3.10362 |
| GO:00094<br>04 | toxin metabolic process                                       | -3.10221 |
| GO:00224<br>10 | circadian sleep/wake cycle process                            | -3.10221 |
| GO:00456<br>62 | negative regulation of myoblast differentiation               | -3.10221 |
| GO:00509<br>27 | positive regulation of positive chemotaxis                    | -3.10221 |
| GO:00601<br>48 | positive regulation of posttranscriptional gene silencing     | -3.10221 |
| GO:00614<br>36 | establishment of skin barrier                                 | -3.10221 |
| GO:00713<br>78 | cellular response to growth hormone stimulus                  | -3.10221 |
| GO:19043<br>76 | negative regulation of protein localization to cell periphery | -3.10221 |



|                |                                                                               |          |
|----------------|-------------------------------------------------------------------------------|----------|
| GO:20006<br>79 | positive regulation of transcription regulatory region DNA binding            | -3.10221 |
| GO:00316<br>44 | regulation of neurological system process                                     | -3.09824 |
| GO:20012<br>51 | negative regulation of chromosome organization                                | -3.09824 |
| GO:00457<br>47 | positive regulation of Notch signaling pathway                                | -3.08919 |
| GO:00480<br>16 | inositol phosphate-mediated signaling                                         | -3.08919 |
| GO:00343<br>40 | response to type I interferon                                                 | -3.08543 |
| GO:00158<br>50 | organic hydroxy compound transport                                            | -3.07204 |
| GO:00902<br>63 | positive regulation of canonical Wnt signaling pathway                        | -3.06789 |
| GO:00312<br>94 | lymphocyte costimulation                                                      | -3.06063 |
| GO:19037<br>49 | positive regulation of establishment of protein localization to mitochondrion | -3.06063 |
| GO:00516<br>04 | protein maturation                                                            | -3.05903 |
| GO:00072<br>76 | gamete generation                                                             | -3.05887 |
| GO:00313<br>33 | negative regulation of protein complex assembly                               | -3.05289 |
| GO:19031<br>69 | regulation of calcium ion transmembrane transport                             | -3.05289 |
| GO:00020<br>68 | glandular epithelial cell development                                         | -3.0513  |
| GO:00063<br>09 | apoptotic DNA fragmentation                                                   | -3.0513  |
| GO:00067<br>06 | steroid catabolic process                                                     | -3.0513  |
| GO:00359<br>02 | response to immobilization stress                                             | -3.0513  |
| GO:00428<br>32 | defense response to protozoan                                                 | -3.0513  |
| GO:00509<br>26 | regulation of positive chemotaxis                                             | -3.0513  |
| GO:00709<br>11 | global genome nucleotide-excision repair                                      | -3.0513  |
| GO:19036<br>49 | regulation of cytoplasmic transport                                           | -3.0513  |

|            |                                                                      |          |
|------------|----------------------------------------------------------------------|----------|
| GO:0007215 | glutamate receptor signaling pathway                                 | -3.04622 |
| GO:0010522 | regulation of calcium ion transport into cytosol                     | -3.04622 |
| GO:0015837 | amine transport                                                      | -3.04622 |
| GO:0019217 | regulation of fatty acid metabolic process                           | -3.04622 |
| GO:0042102 | positive regulation of T cell proliferation                          | -3.04622 |
| GO:0002886 | regulation of myeloid leukocyte mediated immunity                    | -3.03261 |
| GO:0060043 | regulation of cardiac muscle cell proliferation                      | -3.03261 |
| GO:0055024 | regulation of cardiac muscle tissue development                      | -3.02695 |
| GO:0060537 | muscle tissue development                                            | -3.02687 |
| GO:0019229 | regulation of vasoconstriction                                       | -3.00512 |
| GO:0022029 | telencephalon cell migration                                         | -3.00512 |
| GO:0050994 | regulation of lipid catabolic process                                | -3.00512 |
| GO:0051784 | negative regulation of nuclear division                              | -3.00512 |
| GO:0061077 | chaperone-mediated protein folding                                   | -3.00512 |
| GO:1902808 | positive regulation of cell cycle G1/S phase transition              | -3.00512 |
| GO:0001562 | response to protozoan                                                | -3.00249 |
| GO:0002825 | regulation of T-helper 1 type immune response                        | -3.00249 |
| GO:0009065 | glutamine family amino acid catabolic process                        | -3.00249 |
| GO:0009651 | response to salt stress                                              | -3.00249 |
| GO:1900120 | regulation of receptor binding                                       | -3.00249 |
| GO:1903203 | regulation of oxidative stress-induced neuron death                  | -3.00249 |
| GO:1904357 | negative regulation of telomere maintenance via telomere lengthening | -3.00249 |

|            |                                                                  |          |
|------------|------------------------------------------------------------------|----------|
| GO:0006260 | DNA replication                                                  | -3.00006 |
| GO:0043312 | neutrophil degranulation                                         | -2.99846 |
| GO:1990845 | adaptive thermogenesis                                           | -2.99407 |
| GO:0022898 | regulation of transmembrane transporter activity                 | -2.98997 |
| GO:0008360 | regulation of cell shape                                         | -2.97965 |
| GO:0033013 | tetrapyrrole metabolic process                                   | -2.97814 |
| GO:0002283 | neutrophil activation involved in immune response                | -2.97709 |
| GO:0110053 | regulation of actin filament organization                        | -2.96992 |
| GO:0022011 | myelination in peripheral nervous system                         | -2.95561 |
| GO:0032292 | peripheral nervous system axon ensheathment                      | -2.95561 |
| GO:0033561 | regulation of water loss via skin                                | -2.95561 |
| GO:0042745 | circadian sleep/wake cycle                                       | -2.95561 |
| GO:0044331 | cell-cell adhesion mediated by cadherin                          | -2.95561 |
| GO:0045932 | negative regulation of muscle contraction                        | -2.95561 |
| GO:0090200 | positive regulation of release of cytochrome c from mitochondria | -2.95561 |
| GO:1903579 | negative regulation of ATP metabolic process                     | -2.95561 |
| GO:0002456 | T cell mediated immunity                                         | -2.95199 |
| GO:0014812 | muscle cell migration                                            | -2.95199 |
| GO:0032414 | positive regulation of ion transmembrane transporter activity    | -2.95199 |
| GO:0034446 | substrate adhesion-dependent cell spreading                      | -2.95199 |
| GO:0046632 | alpha-beta T cell differentiation                                | -2.95199 |
| GO:0046928 | regulation of neurotransmitter secretion                         | -2.95199 |

|                |                                                                             |          |             |
|----------------|-----------------------------------------------------------------------------|----------|-------------|
| GO:19052<br>69 | positive regulation of chromatin organization                               | -2.95199 |             |
| GO:00022<br>94 | CD4-positive, alpha-beta T cell differentiation involved in immune response | -2.95165 |             |
| GO:00105<br>18 | positive regulation of phospholipase activity                               | -2.95165 |             |
| GO:00106<br>76 | positive regulation of cellular carbohydrate metabolic process              | -2.95165 |             |
| GO:00486<br>45 | animal organ formation                                                      | -2.95165 |             |
| GO:00550<br>25 | positive regulation of cardiac muscle tissue development                    | -2.95165 |             |
| GO:00550<br>81 | anion homeostasis                                                           | -2.95165 |             |
| GO:20012<br>44 | positive regulation of intrinsic apoptotic signaling pathway                | -2.95165 |             |
| GO:00550<br>67 | monovalent inorganic cation homeostasis                                     | -2.95114 |             |
| GO:00604<br>02 | calcium ion transport into cytosol                                          | -2.95114 |             |
| GO:19037<br>07 | negative regulation of hemopoiesis                                          | -2.95114 |             |
| GO:00064<br>12 | translation                                                                 | -2.93426 |             |
| GO:00971<br>64 | ammonium ion metabolic process                                              | -2.93177 |             |
| GO:00022<br>87 | alpha-beta T cell activation involved in immune response                    | -2.92563 |             |
| GO:00022<br>93 | alpha-beta T cell differentiation involved in immune response               | -2.92563 |             |
| GO:00466<br>22 | positive regulation of organ growth                                         | -2.92563 |             |
| GO:00705<br>27 | platelet aggregation                                                        | -2.92563 |             |
| GO:00510<br>17 | actin filament bundle assembly                                              | -2.92305 |             |
| GO:00062<br>94 | nucleotide-excision repair, preincision complex assembly                    | -2.91052 |             |
| GO:00072<br>63 | nitric oxide mediated signal transduction                                   | -2.91052 |             |
| GO:00082<br>09 | androgen metabolic process                                                  | -2.91052 |             |
| GO:00198<br>35 | cytolysis                                                                   |          | -<br>2.9105 |

|            |                                                              |          |   |
|------------|--------------------------------------------------------------|----------|---|
|            |                                                              |          | 2 |
| GO:0046637 | regulation of alpha-beta T cell differentiation              | -2.90007 |   |
| GO:0051898 | negative regulation of protein kinase B signaling            | -2.90007 |   |
| GO:1900449 | regulation of glutamate receptor signaling pathway           | -2.90007 |   |
| GO:2000401 | regulation of lymphocyte migration                           | -2.90007 |   |
| GO:0018958 | phenol-containing compound metabolic process                 | -2.89788 |   |
| GO:0042119 | neutrophil activation                                        | -2.89339 |   |
| GO:0007229 | integrin-mediated signaling pathway                          | -2.88023 |   |
| GO:0015696 | ammonium transport                                           | -2.88023 |   |
| GO:1901800 | positive regulation of proteasomal protein catabolic process | -2.88023 |   |
| GO:0032729 | positive regulation of interferon-gamma production           | -2.87495 |   |
| GO:0051926 | negative regulation of calcium ion transport                 | -2.87495 |   |
| GO:0070265 | necrotic cell death                                          | -2.87495 |   |
| GO:1905953 | negative regulation of lipid localization                    | -2.87495 |   |
| GO:0061572 | actin filament bundle organization                           | -2.86813 |   |
| GO:0031116 | positive regulation of microtubule polymerization            | -2.8671  |   |
| GO:0036475 | neuron death in response to oxidative stress                 | -2.8671  |   |
| GO:0070168 | negative regulation of biomineral tissue development         | -2.8671  |   |
| GO:0034440 | lipid oxidation                                              | -2.86277 |   |
| GO:1901605 | alpha-amino acid metabolic process                           | -2.85291 |   |
| GO:0036230 | granulocyte activation                                       | -2.85258 |   |
| GO:0016445 | somatic diversification of immunoglobulins                   | -2.85027 |   |

|                |                                                                  |          |
|----------------|------------------------------------------------------------------|----------|
| GO:00901<br>81 | regulation of cholesterol metabolic process                      | -2.85027 |
| GO:00985<br>86 | cellular response to virus                                       | -2.85027 |
| GO:19058<br>18 | regulation of chromosome separation                              | -2.85027 |
| GO:20003<br>78 | negative regulation of reactive oxygen species metabolic process | -2.85027 |
| GO:00072<br>64 | small GTPase mediated signal transduction                        | -2.84585 |
| GO:00062<br>89 | nucleotide-excision repair                                       | -2.84548 |
| GO:00324<br>09 | regulation of transporter activity                               | -2.84399 |
| GO:00464<br>86 | glycerolipid metabolic process                                   | -2.84245 |
| GO:00171<br>58 | regulation of calcium ion-dependent exocytosis                   | -2.82838 |
| GO:19035<br>10 | mucopolysaccharide metabolic process                             | -2.82838 |
| GO:00070<br>15 | actin filament organization                                      | -2.82771 |
| GO:00068<br>79 | cellular iron ion homeostasis                                    | -2.826   |
| GO:00364<br>98 | IRE1-mediated unfolded protein response                          | -2.826   |
| GO:00466<br>26 | regulation of insulin receptor signaling pathway                 | -2.826   |
| GO:00026<br>75 | positive regulation of acute inflammatory response               | -2.82523 |
| GO:00028<br>28 | regulation of type 2 immune response                             | -2.82523 |
| GO:00109<br>54 | positive regulation of protein processing                        | -2.82523 |
| GO:00610<br>82 | myeloid leukocyte cytokine production                            | -2.82523 |
| GO:00702<br>29 | negative regulation of lymphocyte apoptotic process              | -2.82523 |
| GO:00900<br>75 | relaxation of muscle                                             | -2.82523 |
| GO:19005<br>43 | negative regulation of purine nucleotide metabolic process       | -2.82523 |
| GO:19007<br>45 | positive regulation of p38MAPK cascade                           | -2.82523 |

|                |                                                                                              |          |
|----------------|----------------------------------------------------------------------------------------------|----------|
| GO:19022<br>30 | negative regulation of intrinsic apoptotic signaling pathway in response to DNA damage       | -2.82523 |
| GO:19054<br>76 | negative regulation of protein localization to membrane                                      | -2.82523 |
| GO:00324<br>11 | positive regulation of transporter activity                                                  | -2.81145 |
| GO:00025<br>62 | somatic diversification of immune receptors via germline recombination within a single locus | -2.80214 |
| GO:00066<br>25 | protein targeting to peroxisome                                                              | -2.80214 |
| GO:00164<br>44 | somatic cell DNA recombination                                                               | -2.80214 |
| GO:00714<br>79 | cellular response to ionizing radiation                                                      | -2.80214 |
| GO:00726<br>62 | protein localization to peroxisome                                                           | -2.80214 |
| GO:00726<br>63 | establishment of protein localization to peroxisome                                          | -2.80214 |
| GO:00903<br>07 | mitotic spindle assembly                                                                     | -2.80214 |
| GO:00486<br>40 | negative regulation of developmental growth                                                  | -2.7947  |
| GO:00027<br>24 | regulation of T cell cytokine production                                                     | -2.78481 |
| GO:00028<br>88 | positive regulation of myeloid leukocyte mediated immunity                                   | -2.78481 |
| GO:00107<br>43 | regulation of macrophage derived foam cell differentiation                                   | -2.78481 |
| GO:00326<br>73 | regulation of interleukin-4 production                                                       | -2.78481 |
| GO:00427<br>44 | hydrogen peroxide catabolic process                                                          | -2.78481 |
| GO:00459<br>80 | negative regulation of nucleotide metabolic process                                          | -2.78481 |
| GO:00606<br>03 | mammary gland duct morphogenesis                                                             | -2.78481 |
| GO:19022<br>35 | regulation of endoplasmic reticulum stress-induced intrinsic apoptotic signaling pathway     | -2.78481 |
| GO:00435<br>74 | peroxisomal transport                                                                        | -2.77867 |
| GO:00600<br>38 | cardiac muscle cell proliferation                                                            | -2.77867 |
| GO:00609<br>64 | regulation of gene silencing by miRNA                                                        | -2.77811 |

|            |                                                                                              |          |
|------------|----------------------------------------------------------------------------------------------|----------|
| GO:0030307 | positive regulation of cell growth                                                           | -2.77581 |
| GO:0002244 | hematopoietic progenitor cell differentiation                                                | -2.76299 |
| GO:0051258 | protein polymerization                                                                       | -2.75197 |
| GO:0060401 | cytosolic calcium ion transport                                                              | -2.75027 |
| GO:0035587 | purinergic receptor signaling pathway                                                        | -2.74576 |
| GO:1903319 | positive regulation of protein maturation                                                    | -2.74576 |
| GO:0051209 | release of sequestered calcium ion into cytosol                                              | -2.74544 |
| GO:0051817 | modification of morphology or physiology of other organism involved in symbiotic interaction | -2.74544 |
| GO:0002292 | T cell differentiation involved in immune response                                           | -2.73287 |
| GO:0033627 | cell adhesion mediated by integrin                                                           | -2.73287 |
| GO:0050795 | regulation of behavior                                                                       | -2.73287 |
| GO:0050891 | multicellular organismal water homeostasis                                                   | -2.73287 |
| GO:0031109 | microtubule polymerization or depolymerization                                               | -2.72935 |
| GO:0051283 | negative regulation of sequestering of calcium ion                                           | -2.72935 |
| GO:0007269 | neurotransmitter secretion                                                                   | -2.72509 |
| GO:0045216 | cell-cell junction organization                                                              | -2.72509 |
| GO:0099643 | signal release from synapse                                                                  | -2.72509 |
| GO:2000736 | regulation of stem cell differentiation                                                      | -2.71341 |
| GO:0033047 | regulation of mitotic sister chromatid segregation                                           | -2.71051 |
| GO:0033692 | cellular polysaccharide biosynthetic process                                                 | -2.71051 |
| GO:0070988 | demethylation                                                                                | -2.71051 |
| GO:0000737 | DNA catabolic process, endonucleolytic                                                       | -2.70797 |



|            |                                                                               |          |
|------------|-------------------------------------------------------------------------------|----------|
| GO:0002691 | regulation of cellular extravasation                                          | -2.70797 |
| GO:0007094 | mitotic spindle assembly checkpoint                                           | -2.70797 |
| GO:0008608 | attachment of spindle microtubules to kinetochore                             | -2.70797 |
| GO:0010762 | regulation of fibroblast migration                                            | -2.70797 |
| GO:0030851 | granulocyte differentiation                                                   | -2.70797 |
| GO:0031112 | positive regulation of microtubule polymerization or depolymerization         | -2.70797 |
| GO:0031577 | spindle checkpoint                                                            | -2.70797 |
| GO:0035633 | maintenance of permeability of blood-brain barrier                            | -2.70797 |
| GO:0071173 | spindle assembly checkpoint                                                   | -2.70797 |
| GO:0071174 | mitotic spindle checkpoint                                                    | -2.70797 |
| GO:2001024 | negative regulation of response to drug                                       | -2.70797 |
| GO:0002792 | negative regulation of peptide secretion                                      | -2.69763 |
| GO:0016079 | synaptic vesicle exocytosis                                                   | -2.69763 |
| GO:0031398 | positive regulation of protein ubiquitination                                 | -2.69763 |
| GO:0051282 | regulation of sequestering of calcium ion                                     | -2.69763 |
| GO:0002709 | regulation of T cell mediated immunity                                        | -2.6885  |
| GO:0005977 | glycogen metabolic process                                                    | -2.6885  |
| GO:0010611 | regulation of cardiac muscle hypertrophy                                      | -2.6885  |
| GO:0030218 | erythrocyte differentiation                                                   | -2.682   |
| GO:0010769 | regulation of cell morphogenesis involved in differentiation                  | -2.6725  |
| GO:0000083 | regulation of transcription involved in G1/S transition of mitotic cell cycle | -2.67138 |
| GO:0030262 | apoptotic nuclear changes                                                     | -2.67138 |

|                |                                                                                |          |
|----------------|--------------------------------------------------------------------------------|----------|
| GO:00309<br>47 | regulation of vascular endothelial growth factor<br>receptor signaling pathway | -2.67138 |
| GO:00322<br>28 | regulation of synaptic transmission, GABAergic                                 | -2.67138 |
| GO:00326<br>33 | interleukin-4 production                                                       | -2.67138 |
| GO:00343<br>90 | smooth muscle cell apoptotic process                                           | -2.67138 |
| GO:00343<br>91 | regulation of smooth muscle cell apoptotic<br>process                          | -2.67138 |
| GO:00433<br>04 | regulation of mast cell degranulation                                          | -2.67138 |
| GO:00456<br>48 | positive regulation of erythrocyte differentiation                             | -2.67138 |
| GO:00603<br>38 | regulation of type I interferon-mediated<br>signaling pathway                  | -2.67138 |
| GO:00708<br>84 | regulation of calcineurin-NFAT signaling<br>cascade                            | -2.67138 |
| GO:00718<br>68 | cellular response to monoamine stimulus                                        | -2.67138 |
| GO:00718<br>70 | cellular response to catecholamine stimulus                                    | -2.67138 |
| GO:00988<br>01 | regulation of renal system process                                             | -2.67138 |
| GO:00060<br>73 | cellular glucan metabolic process                                              | -2.66683 |
| GO:00105<br>17 | regulation of phospholipase activity                                           | -2.66683 |
| GO:00440<br>42 | glucan metabolic process                                                       | -2.66683 |
| GO:00486<br>75 | axon extension                                                                 | -2.66653 |
| GO:00325<br>35 | regulation of cellular component size                                          | -2.66582 |
| GO:00016<br>54 | eye development                                                                | -2.65822 |
| GO:00512<br>08 | sequestering of calcium ion                                                    | -2.6512  |
| GO:00019<br>10 | regulation of leukocyte mediated cytotoxicity                                  | -2.64549 |
| GO:00508<br>05 | negative regulation of synaptic transmission                                   | -2.64549 |
| GO:00083<br>61 | regulation of cell size                                                        | -2.63965 |

|                |                                                                |          |
|----------------|----------------------------------------------------------------|----------|
| GO:00706<br>13 | regulation of protein processing                               | -2.63965 |
| GO:00033<br>82 | epithelial cell morphogenesis                                  | -2.63593 |
| GO:00322<br>05 | negative regulation of telomere maintenance                    | -2.63593 |
| GO:00330<br>06 | regulation of mast cell activation involved in immune response | -2.63593 |
| GO:00433<br>68 | positive T cell selection                                      | -2.63593 |
| GO:00458<br>41 | negative regulation of mitotic metaphase/anaphase transition   | -2.63593 |
| GO:00716<br>34 | regulation of transforming growth factor beta production       | -2.63593 |
| GO:01060<br>56 | regulation of calcineurin-mediated signaling                   | -2.63593 |
| GO:01500<br>63 | visual system development                                      | -2.62807 |
| GO:00066<br>95 | cholesterol biosynthetic process                               | -2.62447 |
| GO:00083<br>06 | associative learning                                           | -2.62447 |
| GO:00147<br>43 | regulation of muscle hypertrophy                               | -2.62447 |
| GO:00330<br>77 | T cell differentiation in thymus                               | -2.62447 |
| GO:00601<br>93 | positive regulation of lipase activity                         | -2.62447 |
| GO:19026<br>53 | secondary alcohol biosynthetic process                         | -2.62447 |
| GO:19035<br>24 | positive regulation of blood circulation                       | -2.62447 |
| GO:00163<br>58 | dendrite development                                           | -2.62385 |
| GO:00074<br>16 | synapse assembly                                               | -2.61598 |
| GO:19033<br>17 | regulation of protein maturation                               | -2.61598 |
| GO:19035<br>31 | negative regulation of secretion by cell                       | -2.61598 |
| GO:00060<br>81 | cellular aldehyde metabolic process                            | -2.60376 |
| GO:00327<br>20 | negative regulation of tumor necrosis factor production        | -2.60376 |

|            |                                                                          |          |
|------------|--------------------------------------------------------------------------|----------|
| GO:0006296 | nucleotide-excision repair, DNA incision, 5'-to lesion                   | -2.60153 |
| GO:0006471 | protein ADP-ribosylation                                                 | -2.60153 |
| GO:0006921 | cellular component disassembly involved in execution phase of apoptosis  | -2.60153 |
| GO:0043243 | positive regulation of protein complex disassembly                       | -2.60153 |
| GO:0090050 | positive regulation of cell migration involved in sprouting angiogenesis | -2.60153 |
| GO:1902100 | negative regulation of metaphase/anaphase transition of cell cycle       | -2.60153 |
| GO:0050770 | regulation of axonogenesis                                               | -2.59263 |
| GO:0048880 | sensory system development                                               | -2.58365 |
| GO:0042310 | vasoconstriction                                                         | -2.58336 |
| GO:0043367 | CD4-positive, alpha-beta T cell differentiation                          | -2.58336 |
| GO:0048639 | positive regulation of developmental growth                              | -2.58106 |
| GO:0034763 | negative regulation of transmembrane transport                           | -2.57669 |
| GO:0051147 | regulation of muscle cell differentiation                                | -2.56958 |
| GO:0010661 | positive regulation of muscle cell apoptotic process                     | -2.56815 |
| GO:0032094 | response to food                                                         | -2.56815 |
| GO:0032689 | negative regulation of interferon-gamma production                       | -2.56815 |
| GO:0042769 | DNA damage response, detection of DNA damage                             | -2.56815 |
| GO:0045923 | positive regulation of fatty acid metabolic process                      | -2.56815 |
| GO:0051954 | positive regulation of amine transport                                   | -2.56815 |
| GO:0051955 | regulation of amino acid transport                                       | -2.56815 |
| GO:0060045 | positive regulation of cardiac muscle cell proliferation                 | -2.56815 |
| GO:0071604 | transforming growth factor beta production                               | -2.56815 |

|            |                                                                               |          |
|------------|-------------------------------------------------------------------------------|----------|
| GO:0002200 | somatic diversification of immune receptors                                   | -2.56326 |
| GO:0030104 | water homeostasis                                                             | -2.56326 |
| GO:0050672 | negative regulation of lymphocyte proliferation                               | -2.56326 |
| GO:1903556 | negative regulation of tumor necrosis factor superfamily cytokine production  | -2.56326 |
| GO:0006470 | protein dephosphorylation                                                     | -2.56292 |
| GO:0008544 | epidermis development                                                         | -2.54487 |
| GO:0032945 | negative regulation of mononuclear cell proliferation                         | -2.54344 |
| GO:0055021 | regulation of cardiac muscle tissue growth                                    | -2.54344 |
| GO:0006656 | phosphatidylcholine biosynthetic process                                      | -2.53572 |
| GO:0006778 | porphyrin-containing compound metabolic process                               | -2.53572 |
| GO:0033683 | nucleotide-excision repair, DNA incision                                      | -2.53572 |
| GO:0038179 | neurotrophin signaling pathway                                                | -2.53572 |
| GO:0045022 | early endosome to late endosome transport                                     | -2.53572 |
| GO:0055090 | acylglycerol homeostasis                                                      | -2.53572 |
| GO:0070328 | triglyceride homeostasis                                                      | -2.53572 |
| GO:0071867 | response to monoamine                                                         | -2.53572 |
| GO:0071869 | response to catecholamine                                                     | -2.53572 |
| GO:1902229 | regulation of intrinsic apoptotic signaling pathway in response to DNA damage | -2.53572 |
| GO:2000249 | regulation of actin cytoskeleton reorganization                               | -2.53572 |
| GO:2000816 | negative regulation of mitotic sister chromatid separation                    | -2.53572 |
| GO:0032434 | regulation of proteasomal ubiquitin-dependent protein catabolic process       | -2.53362 |
| GO:0043010 | camera-type eye development                                                   | -2.53037 |

|            |                                                                                                 |          |
|------------|-------------------------------------------------------------------------------------------------|----------|
| GO:0051279 | regulation of release of sequestered calcium ion into cytosol                                   | -2.52391 |
| GO:0042177 | negative regulation of protein catabolic process                                                | -2.51952 |
| GO:0090101 | negative regulation of transmembrane receptor protein serine/threonine kinase signaling pathway | -2.51952 |
| GO:0061136 | regulation of proteasomal protein catabolic process                                             | -2.51326 |
| GO:0045995 | regulation of embryonic development                                                             | -2.50555 |
| GO:0016126 | sterol biosynthetic process                                                                     | -2.50465 |
| GO:0008207 | C21-steroid hormone metabolic process                                                           | -2.50418 |
| GO:0010613 | positive regulation of cardiac muscle hypertrophy                                               | -2.50418 |
| GO:1905819 | negative regulation of chromosome separation                                                    | -2.50418 |
| GO:0007031 | peroxisome organization                                                                         | -2.48565 |
| GO:0006997 | nucleus organization                                                                            | -2.47797 |
| GO:0051225 | spindle assembly                                                                                | -2.47797 |
| GO:0007212 | dopamine receptor signaling pathway                                                             | -2.47351 |
| GO:0009112 | nucleobase metabolic process                                                                    | -2.47351 |
| GO:0014742 | positive regulation of muscle hypertrophy                                                       | -2.47351 |
| GO:0033574 | response to testosterone                                                                        | -2.47351 |
| GO:0046825 | regulation of protein export from nucleus                                                       | -2.47351 |
| GO:0050832 | defense response to fungus                                                                      | -2.47351 |
| GO:2000008 | regulation of protein localization to cell surface                                              | -2.47351 |
| GO:0051216 | cartilage development                                                                           | -2.4695  |
| GO:0015844 | monoamine transport                                                                             | -2.46692 |
| GO:00330   | regulation of sister chromatid segregation                                                      | -2.46692 |

|            |                                                                                   |          |
|------------|-----------------------------------------------------------------------------------|----------|
| 45         |                                                                                   |          |
| GO:0051651 | maintenance of location in cell                                                   | -2.46692 |
| GO:0055072 | iron ion homeostasis                                                              | -2.46692 |
| GO:0030534 | adult behavior                                                                    | -2.46436 |
| GO:0045844 | positive regulation of striated muscle tissue development                         | -2.44844 |
| GO:0048636 | positive regulation of muscle organ development                                   | -2.44844 |
| GO:0110110 | positive regulation of animal organ morphogenesis                                 | -2.44844 |
| GO:0051590 | positive regulation of neurotransmitter transport                                 | -2.44365 |
| GO:0072595 | maintenance of protein localization in organelle                                  | -2.44365 |
| GO:0098927 | vesicle-mediated transport between endosomal compartments                         | -2.44365 |
| GO:0006112 | energy reserve metabolic process                                                  | -2.43022 |
| GO:1901863 | positive regulation of muscle tissue development                                  | -2.43022 |
| GO:0031032 | actomyosin structure organization                                                 | -2.42684 |
| GO:0097553 | calcium ion transmembrane import into cytosol                                     | -2.42425 |
| GO:0006308 | DNA catabolic process                                                             | -2.41457 |
| GO:0046006 | regulation of activated T cell proliferation                                      | -2.41457 |
| GO:0050850 | positive regulation of calcium-mediated signaling                                 | -2.41457 |
| GO:0050856 | regulation of T cell receptor signaling pathway                                   | -2.41457 |
| GO:0071470 | cellular response to osmotic stress                                               | -2.41457 |
| GO:0001942 | hair follicle development                                                         | -2.41223 |
| GO:0030512 | negative regulation of transforming growth factor beta receptor signaling pathway | -2.41223 |
| GO:0034109 | homotypic cell-cell adhesion                                                      | -2.41223 |

|                |                                                                                       |          |
|----------------|---------------------------------------------------------------------------------------|----------|
| GO:00604<br>20 | regulation of heart growth                                                            | -2.41223 |
| GO:00070<br>43 | cell-cell junction assembly                                                           | -2.41111 |
| GO:19033<br>22 | positive regulation of protein modification by small protein conjugation or removal   | -2.41111 |
| GO:00450<br>17 | glycerolipid biosynthetic process                                                     | -2.41069 |
| GO:00070<br>51 | spindle organization                                                                  | -2.39554 |
| GO:00020<br>28 | regulation of sodium ion transport                                                    | -2.39448 |
| GO:00331<br>73 | calcineurin-NFAT signaling cascade                                                    | -2.38623 |
| GO:00420<br>88 | T-helper 1 type immune response                                                       | -2.38623 |
| GO:00421<br>81 | ketone biosynthetic process                                                           | -2.38623 |
| GO:00224<br>04 | molting cycle process                                                                 | -2.37697 |
| GO:00224<br>05 | hair cycle process                                                                    | -2.37697 |
| GO:19038<br>45 | negative regulation of cellular response to transforming growth factor beta stimulus  | -2.37697 |
| GO:00072<br>65 | Ras protein signal transduction                                                       | -2.37532 |
| GO:00508<br>52 | T cell receptor signaling pathway                                                     | -2.37499 |
| GO:00600<br>41 | retina development in camera-type eye                                                 | -2.37235 |
| GO:00435<br>88 | skin development                                                                      | -2.36817 |
| GO:00987<br>73 | skin epidermis development                                                            | -2.35968 |
| GO:00106<br>77 | negative regulation of cellular carbohydrate metabolic process                        | -2.35859 |
| GO:00217<br>95 | cerebral cortex cell migration                                                        | -2.35859 |
| GO:00310<br>18 | endocrine pancreas development                                                        | -2.35859 |
| GO:00427<br>71 | intrinsic apoptotic signaling pathway in response to DNA damage by p53 class mediator | -2.35859 |
| GO:00903       | regulation of protein deacetylation                                                   | -2.35859 |



|                |                                                                                     |          |
|----------------|-------------------------------------------------------------------------------------|----------|
| 11             |                                                                                     |          |
| GO:01401<br>15 | export across plasma membrane                                                       | -2.35859 |
| GO:00443<br>44 | cellular response to fibroblast growth factor stimulus                              | -2.34705 |
| GO:00488<br>13 | dendrite morphogenesis                                                              | -2.34705 |
| GO:00459<br>21 | positive regulation of exocytosis                                                   | -2.34261 |
| GO:00514<br>92 | regulation of stress fiber assembly                                                 | -2.34261 |
| GO:20001<br>77 | regulation of neural precursor cell proliferation                                   | -2.34261 |
| GO:00427<br>42 | defense response to bacterium                                                       | -2.33844 |
| GO:00987<br>42 | cell-cell adhesion via plasma-membrane adhesion molecules                           | -2.33362 |
| GO:00140<br>14 | negative regulation of gliogenesis                                                  | -2.33162 |
| GO:00970<br>28 | dendritic cell differentiation                                                      | -2.33162 |
| GO:19033<br>21 | negative regulation of protein modification by small protein conjugation or removal | -2.32576 |
| GO:00343<br>32 | adherens junction organization                                                      | -2.30988 |
| GO:00085<br>42 | visual learning                                                                     | -2.3053  |
| GO:00330<br>03 | regulation of mast cell activation                                                  | -2.3053  |
| GO:00358<br>50 | epithelial cell differentiation involved in kidney development                      | -2.3053  |
| GO:00466<br>38 | positive regulation of alpha-beta T cell differentiation                            | -2.3053  |
| GO:19047<br>38 | vascular associated smooth muscle cell migration                                    | -2.3053  |
| GO:19047<br>52 | regulation of vascular associated smooth muscle cell migration                      | -2.3053  |
| GO:00015<br>01 | skeletal system development                                                         | -2.30036 |
| GO:00352<br>64 | multicellular organism growth                                                       | -2.29769 |
| GO:00306<br>41 | regulation of cellular pH                                                           | -2.29268 |

|            |                                                                           |          |
|------------|---------------------------------------------------------------------------|----------|
| GO:0045778 | positive regulation of ossification                                       | -2.29268 |
| GO:0051304 | chromosome separation                                                     | -2.29268 |
| GO:0016331 | morphogenesis of embryonic epithelium                                     | -2.2856  |
| GO:0002820 | negative regulation of adaptive immune response                           | -2.27959 |
| GO:0031952 | regulation of protein autophosphorylation                                 | -2.27959 |
| GO:0033628 | regulation of cell adhesion mediated by integrin                          | -2.27959 |
| GO:0043370 | regulation of CD4-positive, alpha-beta T cell differentiation             | -2.27959 |
| GO:0050798 | activated T cell proliferation                                            | -2.27959 |
| GO:0051932 | synaptic transmission, GABAergic                                          | -2.27959 |
| GO:0055023 | positive regulation of cardiac muscle tissue growth                       | -2.27959 |
| GO:0060324 | face development                                                          | -2.27959 |
| GO:0061001 | regulation of dendritic spine morphogenesis                               | -2.27959 |
| GO:1900744 | regulation of p38MAPK cascade                                             | -2.27959 |
| GO:0048814 | regulation of dendrite morphogenesis                                      | -2.27645 |
| GO:0070167 | regulation of biomineral tissue development                               | -2.27645 |
| GO:0099003 | vesicle-mediated transport in synapse                                     | -2.2759  |
| GO:0007605 | sensory perception of sound                                               | -2.27361 |
| GO:0016202 | regulation of striated muscle tissue development                          | -2.26171 |
| GO:0031056 | regulation of histone modification                                        | -2.26171 |
| GO:0071774 | response to fibroblast growth factor                                      | -2.26171 |
| GO:0031279 | regulation of cyclase activity                                            | -2.25447 |
| GO:0042059 | negative regulation of epidermal growth factor receptor signaling pathway | -2.25447 |

|            |                                                                       |          |
|------------|-----------------------------------------------------------------------|----------|
| GO:0043277 | apoptotic cell clearance                                              | -2.25447 |
| GO:0070231 | T cell apoptotic process                                              | -2.25447 |
| GO:0097720 | calcineurin-mediated signaling                                        | -2.25447 |
| GO:0017156 | calcium ion regulated exocytosis                                      | -2.24991 |
| GO:0006605 | protein targeting                                                     | -2.24671 |
| GO:0030516 | regulation of axon extension                                          | -2.24458 |
| GO:0035710 | CD4-positive, alpha-beta T cell activation                            | -2.24458 |
| GO:0120162 | positive regulation of cold-induced thermogenesis                     | -2.24458 |
| GO:0010976 | positive regulation of neuron projection development                  | -2.24376 |
| GO:0060485 | mesenchyme development                                                | -2.24376 |
| GO:0030509 | BMP signaling pathway                                                 | -2.2382  |
| GO:0050773 | regulation of dendrite development                                    | -2.2382  |
| GO:1902115 | regulation of organelle assembly                                      | -2.23789 |
| GO:0008038 | neuron recognition                                                    | -2.22992 |
| GO:0031648 | protein destabilization                                               | -2.22992 |
| GO:0043300 | regulation of leukocyte degranulation                                 | -2.22992 |
| GO:0043303 | mast cell degranulation                                               | -2.22992 |
| GO:0048546 | digestive tract morphogenesis                                         | -2.22992 |
| GO:0010771 | negative regulation of cell morphogenesis involved in differentiation | -2.22893 |
| GO:0008277 | regulation of G protein-coupled receptor signaling pathway            | -2.22659 |
| GO:1901861 | regulation of muscle tissue development                               | -2.22659 |
| GO:0007163 | establishment or maintenance of cell polarity                         | -2.21922 |

|            |                                                                           |          |
|------------|---------------------------------------------------------------------------|----------|
| GO:0048489 | synaptic vesicle transport                                                | -2.21506 |
| GO:0048634 | regulation of muscle organ development                                    | -2.21506 |
| GO:0097480 | establishment of synaptic vesicle localization                            | -2.21506 |
| GO:0002204 | somatic recombination of immunoglobulin genes involved in immune response | -2.20591 |
| GO:0002208 | somatic diversification of immunoglobulins involved in immune response    | -2.20591 |
| GO:0002279 | mast cell activation involved in immune response                          | -2.20591 |
| GO:0045190 | isotype switching                                                         | -2.20591 |
| GO:0006790 | sulfur compound metabolic process                                         | -2.2046  |
| GO:0007519 | skeletal muscle tissue development                                        | -2.20363 |
| GO:0030203 | glycosaminoglycan metabolic process                                       | -2.20363 |
| GO:2000241 | regulation of reproductive process                                        | -2.20363 |
| GO:0043583 | ear development                                                           | -2.20076 |
| GO:2001020 | regulation of response to DNA damage stimulus                             | -2.18251 |
| GO:0001912 | positive regulation of leukocyte mediated cytotoxicity                    | -2.18242 |
| GO:0002448 | mast cell mediated immunity                                               | -2.18242 |
| GO:0002704 | negative regulation of leukocyte mediated immunity                        | -2.18242 |
| GO:0046580 | negative regulation of Ras protein signal transduction                    | -2.18242 |
| GO:0060421 | positive regulation of heart growth                                       | -2.18242 |
| GO:0060425 | lung morphogenesis                                                        | -2.18242 |
| GO:0044264 | cellular polysaccharide metabolic process                                 | -2.16816 |
| GO:0060191 | regulation of lipase activity                                             | -2.16816 |
| GO:0110020 | regulation of actomyosin structure organization                           | -2.16816 |

|            |                                                   |          |
|------------|---------------------------------------------------|----------|
| GO:0007632 | visual behavior                                   | -2.15943 |
| GO:0032964 | collagen biosynthetic process                     | -2.15943 |
| GO:0038066 | p38MAPK cascade                                   | -2.15943 |
| GO:2000772 | regulation of cellular senescence                 | -2.15943 |
| GO:0019827 | stem cell population maintenance                  | -2.15877 |
| GO:0002042 | cell migration involved in sprouting angiogenesis | -2.1534  |
| GO:0006885 | regulation of pH                                  | -2.1534  |
| GO:0006959 | humoral immune response                           | -2.15105 |
| GO:0002673 | regulation of acute inflammatory response         | -2.14776 |
| GO:0051494 | negative regulation of cytoskeleton organization  | -2.14776 |
| GO:0046474 | glycerophospholipid biosynthetic process          | -2.14663 |
| GO:0048762 | mesenchymal cell differentiation                  | -2.14663 |
| GO:0003300 | cardiac muscle hypertrophy                        | -2.13881 |
| GO:0032231 | regulation of actin filament bundle assembly      | -2.13881 |
| GO:0006584 | catecholamine metabolic process                   | -2.13692 |
| GO:0006968 | cellular defense response                         | -2.13692 |
| GO:0009712 | catechol-containing compound metabolic process    | -2.13692 |
| GO:0044764 | multi-organism cellular process                   | -2.13692 |
| GO:1901185 | negative regulation of ERBB signaling pathway     | -2.13692 |
| GO:0000070 | mitotic sister chromatid segregation              | -2.13685 |
| GO:0098727 | maintenance of cell number                        | -2.13685 |
| GO:0048738 | cardiac muscle tissue development                 | -2.12899 |

|            |                                                                                                                                                  |          |
|------------|--------------------------------------------------------------------------------------------------------------------------------------------------|----------|
| GO:0002824 | positive regulation of adaptive immune response based on somatic recombination of immune receptors built from immunoglobulin superfamily domains | -2.12439 |
| GO:1902106 | negative regulation of leukocyte differentiation                                                                                                 | -2.12439 |
| GO:0001954 | positive regulation of cell-matrix adhesion                                                                                                      | -2.11488 |
| GO:0042304 | regulation of fatty acid biosynthetic process                                                                                                    | -2.11488 |
| GO:0002708 | positive regulation of lymphocyte mediated immunity                                                                                              | -2.11013 |
| GO:0007631 | feeding behavior                                                                                                                                 | -2.11013 |
| GO:0019395 | fatty acid oxidation                                                                                                                             | -2.11013 |
| GO:0014897 | striated muscle hypertrophy                                                                                                                      | -2.09603 |
| GO:0055017 | cardiac muscle tissue growth                                                                                                                     | -2.09603 |
| GO:0099175 | regulation of postsynapse organization                                                                                                           | -2.09603 |
| GO:0060538 | skeletal muscle organ development                                                                                                                | -2.09398 |
| GO:0071772 | response to BMP                                                                                                                                  | -2.09398 |
| GO:0071773 | cellular response to BMP stimulus                                                                                                                | -2.09398 |
| GO:0002712 | regulation of B cell mediated immunity                                                                                                           | -2.09328 |
| GO:0002889 | regulation of immunoglobulin mediated immune response                                                                                            | -2.09328 |
| GO:0030071 | regulation of mitotic metaphase/anaphase transition                                                                                              | -2.09328 |
| GO:0043113 | receptor clustering                                                                                                                              | -2.09328 |
| GO:0060688 | regulation of morphogenesis of a branching structure                                                                                             | -2.09328 |
| GO:0071825 | protein-lipid complex subunit organization                                                                                                       | -2.09328 |
| GO:0090183 | regulation of kidney development                                                                                                                 | -2.09328 |
| GO:1903307 | positive regulation of regulated secretory pathway                                                                                               | -2.09328 |

|            |                                                                  |          |
|------------|------------------------------------------------------------------|----------|
| GO:0048588 | developmental cell growth                                        | -2.08574 |
| GO:0006024 | glycosaminoglycan biosynthetic process                           | -2.08208 |
| GO:0061005 | cell differentiation involved in kidney development              | -2.07211 |
| GO:0014896 | muscle hypertrophy                                               | -2.06828 |
| GO:0051224 | negative regulation of protein transport                         | -2.06266 |
| GO:0090305 | nucleic acid phosphodiester bond hydrolysis                      | -2.06266 |
| GO:0031346 | positive regulation of cell projection organization              | -2.05481 |
| GO:0002821 | positive regulation of adaptive immune response                  | -2.05464 |
| GO:0006641 | triglyceride metabolic process                                   | -2.05464 |
| GO:0006022 | aminoglycan metabolic process                                    | -2.05238 |
| GO:1990138 | neuron projection extension                                      | -2.05238 |
| GO:0034249 | negative regulation of cellular amide metabolic process          | -2.052   |
| GO:0007091 | metaphase/anaphase transition of mitotic cell cycle              | -2.05136 |
| GO:0010656 | negative regulation of muscle cell apoptotic process             | -2.05136 |
| GO:0051055 | negative regulation of lipid biosynthetic process                | -2.05136 |
| GO:1902099 | regulation of metaphase/anaphase transition of cell cycle        | -2.05136 |
| GO:0051149 | positive regulation of muscle cell differentiation               | -2.04114 |
| GO:0061387 | regulation of extent of cell growth                              | -2.04114 |
| GO:0043030 | regulation of macrophage activation                              | -2.03101 |
| GO:0051058 | negative regulation of small GTPase mediated signal transduction | -2.03101 |
| GO:0043087 | regulation of GTPase activity                                    | -2.03038 |
| GO:0006941 | striated muscle contraction                                      | -2.02196 |

|            |                                                              |          |
|------------|--------------------------------------------------------------|----------|
| GO:0010921 | regulation of phosphatase activity                           | -2.02196 |
| GO:1904950 | negative regulation of establishment of protein localization | -2.02196 |
| GO:0002223 | stimulatory C-type lectin receptor signaling pathway         | -2.01458 |
| GO:0030004 | cellular monovalent inorganic cation homeostasis             | -2.01458 |
| GO:0042093 | T-helper cell differentiation                                | -2.01104 |
| GO:0044784 | metaphase/anaphase transition of cell cycle                  | -2.01104 |

## Cellular component

| GO         | Description                                                    | LogP     |
|------------|----------------------------------------------------------------|----------|
| GO:1902911 | protein kinase complex                                         | -13.4395 |
| GO:1902554 | serine/threonine protein kinase complex                        | -11.6033 |
| GO:0061695 | transferase complex, transferring phosphorus-containing groups | -11.1846 |
| GO:0098552 | side of membrane                                               | -10.3754 |
| GO:0045121 | membrane raft                                                  | -10.2864 |
| GO:0098857 | membrane microdomain                                           | -10.2649 |
| GO:0098589 | membrane region                                                | -9.9929  |
| GO:0031983 | vesicle lumen                                                  | -9.18179 |
| GO:0035976 | transcription factor AP-1 complex                              | -8.55394 |
| GO:0060205 | cytoplasmic vesicle lumen                                      | -8.31367 |
| GO:0009897 | external side of plasma membrane                               | -7.85534 |
| GO:0034774 | secretory granule lumen                                        | -7.75074 |
| GO:0000307 | cyclin-dependent protein kinase holoenzyme complex             | -7.58061 |



|                |                                                |              |
|----------------|------------------------------------------------|--------------|
| GO:003109<br>3 | platelet alpha granule lumen                   | -<br>7.48831 |
| GO:000566<br>7 | transcription factor complex                   | -<br>7.33899 |
| GO:004485<br>3 | plasma membrane raft                           | -<br>6.77073 |
| GO:000590<br>1 | caveola                                        | -<br>6.75021 |
| GO:003101<br>2 | extracellular matrix                           | -<br>6.62528 |
| GO:003109<br>1 | platelet alpha granule                         | -<br>6.43856 |
| GO:004847<br>1 | perinuclear region of cytoplasm                | -<br>6.33181 |
| GO:004302<br>5 | neuronal cell body                             | -<br>5.76736 |
| GO:000563<br>5 | nuclear envelope                               | -<br>5.61878 |
| GO:000578<br>8 | endoplasmic reticulum lumen                    | -5.4972      |
| GO:006202<br>3 | collagen-containing extracellular matrix       | -<br>5.43312 |
| GO:199023<br>4 | transferase complex                            | -<br>5.35132 |
| GO:004323<br>5 | receptor complex                               | -5.1432      |
| GO:004429<br>7 | cell body                                      | -<br>5.07546 |
| GO:0005911     | cell-cell junction                             | -<br>5.06478 |
| GO:009898<br>4 | neuron to neuron synapse                       | -<br>4.71992 |
| GO:000581<br>5 | microtubule organizing center                  | -<br>4.68465 |
| GO:009879<br>4 | postsynapse                                    | -<br>4.65222 |
| GO:000032<br>3 | lytic vacuole                                  | -<br>4.65007 |
| GO:000576<br>4 | lysosome                                       | -<br>4.65007 |
| GO:009057<br>5 | RNA polymerase II transcription factor complex | -<br>4.64391 |
| GO:003042<br>5 | dendrite                                       | -<br>4.63587 |

|                |                                        |              |
|----------------|----------------------------------------|--------------|
| GO:003042<br>4 | axon                                   | -<br>4.62772 |
| GO:009744<br>7 | dendritic tree                         | -<br>4.61959 |
| GO:001989<br>7 | extrinsic component of plasma membrane | -<br>4.38032 |
| GO:000577<br>0 | late endosome                          | -4.3768      |
| GO:001406<br>9 | postsynaptic density                   | -4.37511     |
| GO:004479<br>8 | nuclear transcription factor complex   | -<br>4.34472 |
| GO:003227<br>9 | asymmetric synapse                     | -<br>4.30604 |
| GO:000591<br>2 | adherens junction                      | -<br>4.19225 |
| GO:000590<br>2 | microvillus                            | -<br>4.19157 |
| GO:000592<br>5 | focal adhesion                         | -4.1845      |
| GO:000592<br>4 | cell-substrate adherens junction       | -<br>4.15501 |
| GO:009957<br>2 | postsynaptic specialization            | -<br>4.10765 |
| GO:003005<br>5 | cell-substrate junction                | -<br>4.10646 |
| GO:007016<br>1 | anchoring junction                     | -<br>4.06144 |
| GO:000581<br>9 | spindle                                | -<br>4.04429 |
| GO:001632<br>3 | basolateral plasma membrane            | -<br>4.02146 |
| GO:004517<br>7 | apical part of cell                    | -<br>4.02091 |
| GO:000581<br>3 | centrosome                             | -<br>3.95878 |
| GO:001562<br>9 | actin cytoskeleton                     | -<br>3.94216 |
| GO:000587<br>6 | spindle microtubule                    | -<br>3.90409 |
| GO:003299<br>3 | protein-DNA complex                    | -<br>3.84788 |
| GO:000989<br>8 | cytoplasmic side of plasma membrane    | -<br>3.66766 |

|                |                                                            |              |
|----------------|------------------------------------------------------------|--------------|
| GO:003196<br>8 | organelle outer membrane                                   | -<br>3.66566 |
| GO:001986<br>7 | outer membrane                                             | -3.6388      |
| GO:009885<br>8 | actin-based cell projection                                | -3.6388      |
| GO:003065<br>9 | cytoplasmic vesicle membrane                               | -<br>3.63512 |
| GO:003196<br>5 | nuclear membrane                                           | -<br>3.39701 |
| GO:003049<br>6 | midbody                                                    | -<br>3.39334 |
| GO:001989<br>8 | extrinsic component of membrane                            | -<br>3.34531 |
| GO:009856<br>2 | cytoplasmic side of membrane                               | -<br>3.30905 |
| GO:003013<br>9 | endocytic vesicle                                          | -<br>3.27471 |
| GO:000574<br>1 | mitochondrial outer membrane                               | -<br>3.25464 |
| GO:003123<br>4 | extrinsic component of cytoplasmic side of plasma membrane | -<br>3.08543 |
| GO:003326<br>7 | axon part                                                  | -<br>3.05903 |
| GO:004320<br>4 | perikaryon                                                 | -<br>2.97965 |
| GO:003125<br>2 | cell leading edge                                          | -<br>2.93288 |
| GO:009868<br>7 | chromosomal region                                         | -<br>2.88179 |
| GO:003066<br>6 | endocytic vesicle membrane                                 | -<br>2.86813 |
| GO:000078<br>0 | condensed nuclear chromosome, centromeric region           | -<br>2.78481 |
| GO:000574<br>0 | mitochondrial envelope                                     | -<br>2.76785 |
| GO:003013<br>5 | coated vesicle                                             | -<br>2.76099 |
| GO:009879<br>3 | presynapse                                                 | -<br>2.74701 |
| GO:009879<br>7 | plasma membrane protein complex                            | -<br>2.71795 |
| GO:009738<br>6 | glial cell projection                                      | -<br>2.70797 |

|                |                                   |              |
|----------------|-----------------------------------|--------------|
| GO:000592<br>3 | bicellular tight junction         | -2.682       |
| GO:190481<br>3 | ficolin-1-rich granule lumen      | -2.6512      |
| GO:005123<br>3 | spindle midzone                   | -<br>2.63593 |
| GO:003159<br>4 | neuromuscular junction            | -<br>2.62447 |
| GO:004878<br>6 | presynaptic active zone           | -<br>2.62447 |
| GO:010100<br>2 | ficolin-1-rich granule            | -<br>2.60426 |
| GO:007016<br>0 | tight junction                    | -<br>2.57669 |
| GO:000177<br>2 | immunological synapse             | -<br>2.53572 |
| GO:003013<br>6 | clathrin-coated vesicle           | -<br>2.48034 |
| GO:009868<br>5 | Schaffer collateral - CA1 synapse | -<br>2.46692 |
| GO:004329<br>6 | apical junction complex           | -<br>2.38516 |
| GO:003197<br>0 | organelle envelope lumen          | -<br>2.35968 |
| GO:003557<br>8 | azurophil granule lumen           | -<br>2.34261 |
| GO:009897<br>8 | glutamatergic synapse             | -<br>2.27383 |
| GO:003125<br>3 | cell projection membrane          | -<br>2.26679 |
| GO:001632<br>4 | apical plasma membrane            | -<br>2.25977 |
| GO:000992<br>5 | basal plasma membrane             | -<br>2.20591 |
| GO:000079<br>3 | condensed chromosome              | -<br>2.20076 |
| GO:000079<br>4 | condensed nuclear chromosome      | -2.1534      |
| GO:000579<br>6 | Golgi lumen                       | -2.1534      |
| GO:000078<br>1 | chromosome, telomeric region      | -<br>2.14776 |
| GO:000092<br>2 | spindle pole                      | -<br>2.12601 |

|                |                        |              |
|----------------|------------------------|--------------|
| GO:003196<br>6 | mitochondrial membrane | -2.11924     |
| GO:003086<br>3 | cortical cytoskeleton  | -2.11013     |
| GO:015003<br>4 | distal axon            | -<br>2.09881 |
| GO:000577<br>5 | vacuolar lumen         | -<br>2.04216 |
| GO:000563<br>7 | nuclear inner membrane | -2.01104     |

## Molecular function

| ID             | Description                                            | LogP             |
|----------------|--------------------------------------------------------|------------------|
| GO:00167<br>73 | phosphotransferase activity, alcohol group as acceptor | -<br>30.17<br>52 |
| GO:00046<br>72 | protein kinase activity                                | -<br>29.94<br>15 |
| GO:00163<br>01 | kinase activity                                        | -<br>28.43<br>54 |
| GO:00199<br>00 | kinase binding                                         | -<br>19.41<br>27 |
| GO:00046<br>74 | protein serine/threonine kinase activity               | -<br>18.69<br>32 |
| GO:00199<br>01 | protein kinase binding                                 | -<br>17.37<br>69 |
| GO:00051<br>26 | cytokine receptor binding                              | -<br>17.21<br>2  |
| GO:00081<br>34 | transcription factor binding                           | -<br>16.04<br>49 |
| GO:00305<br>45 | receptor regulator activity                            | -<br>14.47<br>4  |
| GO:00199       | protein domain specific binding                        | -                |

|                |                                                                          |                  |
|----------------|--------------------------------------------------------------------------|------------------|
| 04             |                                                                          | 13.92<br>46      |
| GO:00164<br>91 | oxidoreductase activity                                                  | -<br>13.26<br>29 |
| GO:00508<br>39 | cell adhesion molecule binding                                           | -<br>13.00<br>33 |
| GO:00200<br>37 | heme binding                                                             | -<br>12.95<br>82 |
| GO:00708<br>51 | growth factor receptor binding                                           | -<br>12.81<br>89 |
| GO:00051<br>25 | cytokine activity                                                        | -<br>12.78<br>38 |
| GO:00480<br>18 | receptor ligand activity                                                 | -<br>12.65<br>37 |
| GO:00469<br>06 | tetrapyrrole binding                                                     | -<br>12.50<br>63 |
| GO:00310<br>72 | heat shock protein binding                                               | -<br>12.21<br>38 |
| GO:00199<br>02 | phosphatase binding                                                      | -<br>11.90<br>94 |
| GO:00051<br>78 | integrin binding                                                         | -<br>11.45<br>78 |
| GO:00428<br>03 | protein homodimerization activity                                        | -<br>11.40<br>34 |
| GO:00047<br>13 | protein tyrosine kinase activity                                         | -<br>10.46<br>28 |
| GO:00012<br>28 | DNA-binding transcription activator activity, RNA polymerase II-specific | -<br>10.40<br>42 |
| GO:00480<br>37 | cofactor binding                                                         | -<br>9.689<br>05 |

|            |                                                                                                                                                                                             |              |
|------------|---------------------------------------------------------------------------------------------------------------------------------------------------------------------------------------------|--------------|
| GO:0004497 | monooxygenase activity                                                                                                                                                                      | -<br>9.60715 |
| GO:0016705 | oxidoreductase activity, acting on paired donors, with incorporation or reduction of molecular oxygen                                                                                       | -<br>9.59211 |
| GO:0070330 | aromatase activity                                                                                                                                                                          | -<br>9.35846 |
| GO:0051879 | Hsp90 protein binding                                                                                                                                                                       | -<br>9.16273 |
| GO:0019903 | protein phosphatase binding                                                                                                                                                                 | -<br>8.94469 |
| GO:0035173 | histone kinase activity                                                                                                                                                                     | -<br>8.78031 |
| GO:0008083 | growth factor activity                                                                                                                                                                      | -<br>8.52853 |
| GO:0016538 | cyclin-dependent protein serine/threonine kinase regulator activity                                                                                                                         | -<br>8.52661 |
| GO:0004879 | nuclear receptor activity                                                                                                                                                                   | -<br>8.3854  |
| GO:0098531 | transcription factor activity, direct ligand regulated sequence-specific DNA binding                                                                                                        | -<br>8.3854  |
| GO:0016712 | oxidoreductase activity, acting on paired donors, with incorporation or reduction of molecular oxygen, reduced flavin or flavoprotein as one donor, and incorporation of one atom of oxygen | -<br>8.2396  |
| GO:0019825 | oxygen binding                                                                                                                                                                              | -<br>8.14838 |
| GO:0008395 | steroid hydroxylase activity                                                                                                                                                                | -<br>7.97427 |
| GO:0016209 | antioxidant activity                                                                                                                                                                        | -<br>7.84315 |
| GO:00055   | iron ion binding                                                                                                                                                                            | -            |

|                |                                                                                                                                                                      |                  |
|----------------|----------------------------------------------------------------------------------------------------------------------------------------------------------------------|------------------|
| 06             |                                                                                                                                                                      | 7.787<br>78      |
| GO:00047<br>14 | transmembrane receptor protein tyrosine kinase activity                                                                                                              | -<br>7.648<br>53 |
| GO:00085<br>59 | xenobiotic transmembrane transporting ATPase activity                                                                                                                | -<br>7.382<br>85 |
| GO:00510<br>87 | chaperone binding                                                                                                                                                    | -<br>7.116<br>12 |
| GO:00012<br>21 | transcription cofactor binding                                                                                                                                       | -<br>7.046<br>69 |
| GO:00443<br>89 | ubiquitin-like protein ligase binding                                                                                                                                | -<br>7.000<br>38 |
| GO:00191<br>99 | transmembrane receptor protein kinase activity                                                                                                                       | -<br>6.750<br>21 |
| GO:00452<br>96 | cadherin binding                                                                                                                                                     | -<br>6.722<br>41 |
| GO:01010<br>20 | estrogen 16-alpha-hydroxylase activity                                                                                                                               | -<br>6.718<br>84 |
| GO:00512<br>19 | phosphoprotein binding                                                                                                                                               | -<br>6.669<br>25 |
| GO:00316<br>25 | ubiquitin protein ligase binding                                                                                                                                     | -<br>6.478<br>8  |
| GO:00167<br>25 | oxidoreductase activity, acting on CH or CH2 groups                                                                                                                  | -<br>6.246<br>72 |
| GO:00425<br>62 | hormone binding                                                                                                                                                      | -<br>6.122<br>61 |
| GO:00047<br>12 | protein serine/threonine/tyrosine kinase activity                                                                                                                    | -<br>6.036<br>15 |
| GO:00167<br>09 | oxidoreductase activity, acting on paired donors, with incorporation or reduction of molecular oxygen, NAD(P)H as one donor, and incorporation of one atom of oxygen | -<br>6.036<br>15 |



|                |                                                                                              |                  |
|----------------|----------------------------------------------------------------------------------------------|------------------|
| GO:00054<br>96 | steroid binding                                                                              | -<br>6.024<br>33 |
| GO:00352<br>57 | nuclear hormone receptor binding                                                             | -<br>5.909<br>73 |
| GO:00010<br>85 | RNA polymerase II transcription factor binding                                               | -<br>5.884<br>63 |
| GO:00336<br>95 | oxidoreductase activity, acting on CH or CH2 groups, quinone or similar compound as acceptor | -<br>5.812<br>57 |
| GO:00348<br>75 | caffeine oxidase activity                                                                    | -<br>5.812<br>57 |
| GO:00972<br>00 | cysteine-type endopeptidase activity involved in execution phase of apoptosis                | -<br>5.722<br>13 |
| GO:00012<br>23 | transcription coactivator binding                                                            | -<br>5.685<br>24 |
| GO:00352<br>58 | steroid hormone receptor binding                                                             | -<br>5.649<br>64 |
| GO:00971<br>53 | cysteine-type endopeptidase activity involved in apoptotic process                           | -<br>5.446<br>3  |
| GO:00040<br>89 | carbonate dehydratase activity                                                               | -<br>5.323<br>85 |
| GO:00192<br>07 | kinase regulator activity                                                                    | -<br>5.323<br>43 |
| GO:00041<br>75 | endopeptidase activity                                                                       | -<br>5.250<br>97 |
| GO:00514<br>27 | hormone receptor binding                                                                     | -<br>5.172<br>35 |
| GO:00435<br>59 | insulin binding                                                                              | -<br>5.118<br>31 |
| GO:00020<br>39 | p53 binding                                                                                  | -<br>5.044       |

|            |                                                                                                                               |              |
|------------|-------------------------------------------------------------------------------------------------------------------------------|--------------|
|            |                                                                                                                               | 16           |
| GO:0003682 | chromatin binding                                                                                                             | -<br>5.03919 |
| GO:0019887 | protein kinase regulator activity                                                                                             | -<br>5.01744 |
| GO:0005518 | collagen binding                                                                                                              | -<br>4.89542 |
| GO:0030235 | nitric-oxide synthase regulator activity                                                                                      | -<br>4.87762 |
| GO:0001784 | phosphotyrosine residue binding                                                                                               | -<br>4.86371 |
| GO:0030544 | Hsp70 protein binding                                                                                                         | -<br>4.86371 |
| GO:0046982 | protein heterodimerization activity                                                                                           | -<br>4.56707 |
| GO:0016702 | oxidoreductase activity, acting on single donors with incorporation of molecular oxygen, incorporation of two atoms of oxygen | -<br>4.50428 |
| GO:0042910 | xenobiotic transmembrane transporter activity                                                                                 | -<br>4.50428 |
| GO:0003707 | steroid hormone receptor activity                                                                                             | -<br>4.43422 |
| GO:0016701 | oxidoreductase activity, acting on single donors with incorporation of molecular oxygen                                       | -<br>4.43422 |
| GO:0008013 | beta-catenin binding                                                                                                          | -4.383       |
| GO:0045309 | protein phosphorylated amino acid binding                                                                                     | -<br>4.36399 |
| GO:0043560 | insulin receptor substrate binding                                                                                            | -<br>4.34957 |
| GO:0097199 | cysteine-type endopeptidase activity involved in apoptotic signaling pathway                                                  | -<br>4.349   |

|            |                                                                     |                  |
|------------|---------------------------------------------------------------------|------------------|
|            |                                                                     | 57               |
| GO:0050661 | NADP binding                                                        | -<br>4.324<br>37 |
| GO:0070011 | peptidase activity, acting on L-amino acid peptides                 | -<br>4.264<br>39 |
| GO:0016684 | oxidoreductase activity, acting on peroxide as acceptor             | -<br>4.247<br>51 |
| GO:0004693 | cyclin-dependent protein serine/threonine kinase activity           | -<br>4.240<br>65 |
| GO:0097472 | cyclin-dependent protein kinase activity                            | -<br>4.240<br>65 |
| GO:0030546 | receptor activator activity                                         | -<br>4.213<br>62 |
| GO:0030332 | cyclin binding                                                      | -<br>4.180<br>99 |
| GO:0043548 | phosphatidylinositol 3-kinase binding                               | -<br>4.180<br>99 |
| GO:0002020 | protease binding                                                    | -<br>4.153<br>79 |
| GO:0019838 | growth factor binding                                               | -<br>4.153<br>79 |
| GO:0016836 | hydro-lyase activity                                                | -<br>4.137<br>75 |
| GO:0050662 | coenzyme binding                                                    | -<br>4.125<br>02 |
| GO:0008233 | peptidase activity                                                  | -<br>4.124<br>89 |
| GO:0004861 | cyclin-dependent protein serine/threonine kinase inhibitor activity | -<br>4.091<br>03 |
| GO:00083   | RNA polymerase II CTD heptapeptide repeat kinase activity           | -                |

|                |                                             |                  |
|----------------|---------------------------------------------|------------------|
| 53             |                                             | 4.091<br>03      |
| GO:00155<br>62 | efflux transmembrane transporter activity   | -<br>3.877<br>05 |
| GO:00428<br>05 | actinin binding                             | -<br>3.863<br>59 |
| GO:00474<br>85 | protein N-terminus binding                  | -<br>3.853<br>45 |
| GO:00166<br>51 | oxidoreductase activity, acting on NAD(P)H  | -<br>3.809<br>29 |
| GO:00352<br>59 | glucocorticoid receptor binding             | -<br>3.782<br>49 |
| GO:00090<br>55 | electron transfer activity                  | -<br>3.766<br>05 |
| GO:00046<br>97 | protein kinase C activity                   | -<br>3.694<br>66 |
| GO:00046<br>98 | calcium-dependent protein kinase C activity | -<br>3.694<br>66 |
| GO:00168<br>35 | carbon-oxygen lyase activity                | -<br>3.641<br>37 |
| GO:00016<br>18 | virus receptor activity                     | -<br>3.614<br>38 |
| GO:01040<br>05 | hijacked molecular function                 | -<br>3.614<br>38 |
| GO:00082<br>01 | heparin binding                             | -<br>3.587<br>99 |
| GO:00047<br>08 | MAP kinase kinase activity                  | -<br>3.535<br>85 |
| GO:00506<br>60 | flavin adenine dinucleotide binding         | -<br>3.485<br>18 |

|            |                                                                |              |
|------------|----------------------------------------------------------------|--------------|
| GO:0001091 | RNA polymerase II basal transcription factor binding           | -<br>3.46356 |
| GO:0004715 | non-membrane spanning protein tyrosine kinase activity         | -<br>3.44588 |
| GO:0004707 | MAP kinase activity                                            | -<br>3.39532 |
| GO:0032813 | tumor necrosis factor receptor superfamily binding             | -<br>3.37442 |
| GO:0033218 | amide binding                                                  | -<br>3.25256 |
| GO:0016829 | lyase activity                                                 | -<br>3.24126 |
| GO:0017171 | serine hydrolase activity                                      | -<br>3.24126 |
| GO:0004601 | peroxidase activity                                            | -<br>3.2409  |
| GO:0042277 | peptide binding                                                | -<br>3.22551 |
| GO:0005158 | insulin receptor binding                                       | -<br>3.21104 |
| GO:0009931 | calcium-dependent protein serine/threonine kinase activity     | -<br>3.21104 |
| GO:0070412 | R-SMAD binding                                                 | -<br>3.21104 |
| GO:0010857 | calcium-dependent protein kinase activity                      | -<br>3.15539 |
| GO:0070696 | transmembrane receptor protein serine/threonine kinase binding | -<br>3.15539 |
| GO:0005516 | calmodulin binding                                             | -<br>3.149   |

|            |                                                    |              |
|------------|----------------------------------------------------|--------------|
|            |                                                    | 85           |
| GO:0005080 | protein kinase C binding                           | -<br>3.14803 |
| GO:0008289 | lipid binding                                      | -<br>3.12875 |
| GO:0004190 | aspartic-type endopeptidase activity               | -<br>3.10221 |
| GO:0035586 | purinergic receptor activity                       | -<br>3.10221 |
| GO:0070001 | aspartic-type peptidase activity                   | -<br>3.0513  |
| GO:0005507 | copper ion binding                                 | -<br>3.00512 |
| GO:0097110 | scaffold protein binding                           | -<br>3.00512 |
| GO:0046875 | ephrin receptor binding                            | -<br>3.00249 |
| GO:0051393 | alpha-actinin binding                              | -<br>3.00249 |
| GO:0004222 | metalloendopeptidase activity                      | -<br>2.91572 |
| GO:0005520 | insulin-like growth factor binding                 | -<br>2.91052 |
| GO:0033612 | receptor serine/threonine kinase binding           | -<br>2.91052 |
| GO:0031406 | carboxylic acid binding                            | -<br>2.86399 |
| GO:0005164 | tumor necrosis factor receptor binding             | -<br>2.82523 |
| GO:00302   | protein serine/threonine kinase inhibitor activity | -            |

|                |                                                         |                  |
|----------------|---------------------------------------------------------|------------------|
| 91             |                                                         | 2.825<br>23      |
| GO:00510<br>59 | NF-kappaB binding                                       | -<br>2.825<br>23 |
| GO:00428<br>26 | histone deacetylase binding                             | -<br>2.794<br>7  |
| GO:00042<br>52 | serine-type endopeptidase activity                      | -<br>2.775<br>81 |
| GO:00055<br>39 | glycosaminoglycan binding                               | -<br>2.755<br>92 |
| GO:00423<br>79 | chemokine receptor binding                              | -<br>2.755<br>58 |
| GO:00431<br>77 | organic acid binding                                    | -2.735           |
| GO:00010<br>98 | basal transcription machinery binding                   | -<br>2.710<br>51 |
| GO:00010<br>99 | basal RNA polymerase II transcription machinery binding | -<br>2.710<br>51 |
| GO:00080<br>47 | enzyme activator activity                               | -<br>2.708<br>59 |
| GO:00051<br>54 | epidermal growth factor receptor binding                | -<br>2.707<br>97 |
| GO:00463<br>32 | SMAD binding                                            | -<br>2.563<br>26 |
| GO:00082<br>36 | serine-type peptidase activity                          | -<br>2.558<br>17 |
| GO:00336<br>13 | activating transcription factor binding                 | -<br>2.543<br>44 |
| GO:00015<br>40 | amyloid-beta binding                                    | -<br>2.523<br>91 |
| GO:00421       | SH2 domain binding                                      | -                |

|                |                                                                              |                  |
|----------------|------------------------------------------------------------------------------|------------------|
| 69             |                                                                              | 2.473<br>51      |
| GO:19016<br>81 | sulfur compound binding                                                      | -<br>2.463<br>97 |
| GO:00303<br>31 | estrogen receptor binding                                                    | -<br>2.443<br>65 |
| GO:00430<br>28 | cysteine-type endopeptidase regulator activity involved in apoptotic process | -<br>2.414<br>57 |
| GO:00511<br>17 | ATPase binding                                                               | -<br>2.394<br>48 |
| GO:00481<br>56 | tau protein binding                                                          | -<br>2.358<br>59 |
| GO:00512<br>13 | dioxygenase activity                                                         | -<br>2.342<br>61 |
| GO:00010<br>46 | core promoter sequence-specific DNA binding                                  | -<br>2.305<br>3  |
| GO:00010<br>47 | core promoter binding                                                        | -<br>2.305<br>3  |
| GO:00011<br>02 | RNA polymerase II activating transcription factor binding                    | -<br>2.305<br>3  |
| GO:00080<br>09 | chemokine activity                                                           | -<br>2.254<br>47 |
| GO:00048<br>96 | cytokine receptor activity                                                   | -<br>2.244<br>58 |
| GO:00016<br>64 | G protein-coupled receptor binding                                           | -<br>2.220<br>04 |
| GO:00170<br>46 | peptide hormone binding                                                      | -<br>2.205<br>91 |
| GO:00436<br>21 | protein self-association                                                     | -<br>2.072<br>11 |



|            |                                         |          |
|------------|-----------------------------------------|----------|
| GO:0015238 | drug transmembrane transporter activity | -2.01458 |
| GO:0016597 | amino acid binding                      | -2.01104 |

**Table S5. 49 signaling pathways in KEGG pathway enrichment**

| ID       | Description                                          | LogP     |
|----------|------------------------------------------------------|----------|
| hsa05200 | Pathways in cancer                                   | -49.811  |
| hsa04668 | TNF signaling pathway                                | -34.1958 |
| hsa04657 | IL-17 signaling pathway                              | -33.2423 |
| hsa04933 | AGE-RAGE signaling pathway in diabetic complications | -30.0409 |
| hsa04068 | foxo signaling pathway                               | -25.599  |
| hsa04151 | PI3K-Akt signaling pathway                           | -24.9743 |
| hsa04010 | MAPK signaling pathway                               | -21.2708 |
| hsa04660 | T cell receptor signaling pathway                    | -19.8973 |
| hsa04066 | HIF-1 signaling pathway                              | -19.5263 |
| hsa04064 | NF-kappa B signaling pathway                         | -18.9481 |
| hsa04625 | c-type lectin receptor signaling pathway             | -18.9481 |
| hsa04620 | Toll-like receptor signaling pathway                 | -18.6471 |
| hsa04012 | ErbB signaling pathway                               | -18.484  |
| hsa04926 | relaxin signaling pathway                            | -18.3847 |
| hsa04115 | p53 signaling pathway                                | -16.7018 |
| hsa04664 | Fc epsilon RI signaling pathway                      | -16.6144 |
| hsa04062 | Chemokine signaling pathway                          | -16.3209 |
| hsa04621 | NOD-like receptor signaling pathway                  | -15.7797 |
| hsa04917 | Prolactin signaling pathway                          | -15.5108 |
| hsa04014 | Ras signaling pathway                                | -15.3423 |
| hsa04015 | Rap1 signaling pathway                               | -14.1374 |
| hsa04630 | JAK-STAT signaling pathway                           | -13.9678 |
| hsa04915 | Estrogen signaling pathway                           | -13.8456 |
| hsa04662 | B cell receptor signaling pathway                    | -12.107  |
| hsa04370 | VEGF signaling pathway                               | -11.8037 |
| hsa04722 | Neurotrophin signaling pathway                       | -11.0973 |
| hsa04912 | GnRH signaling pathway                               | -11.094  |
| hsa04211 | Longevity regulating pathway                         | -10.5382 |
| hsa04024 | cAMP signaling pathway                               | -9.85272 |
| hsa04071 | Sphingolipid signaling pathway                       | -9.71165 |
| hsa04910 | Insulin signaling pathway                            | -8.74773 |

|          |                                                          |          |
|----------|----------------------------------------------------------|----------|
| hsa04919 | thyroid hormone signaling pathway                        | -8.72817 |
| hsa04622 | RIG-I-like receptor signaling pathway                    | -8.53742 |
| hsa04152 | AMPK signaling pathway                                   | -8.50766 |
| hsa04072 | Phospholipase D signaling pathway                        | -8.49809 |
| hsa04213 | Longevity regulating pathway - multiple species          | -7.76007 |
| hsa04623 | Cytosolic DNA-sensing pathway                            | -7.64853 |
| hsa04150 | mTOR signaling pathway                                   | -7.58329 |
| hsa04921 | Oxytocin signaling pathway                               | -7.49878 |
| hsa04920 | Adipocytokine signaling pathway                          | -5.99848 |
| hsa04371 | Apelin signaling pathway                                 | -4.89243 |
| hsa04550 | Signaling pathways regulating pluripotency of stem cells | -4.74471 |
| hsa04310 | Wnt signaling pathway                                    | -3.58799 |
| hsa04350 | TGF-beta signaling pathway                               | -3.20877 |
| hsa04020 | Calcium signaling pathway                                | -3.07456 |
| hsa04922 | Glucagon signaling pathway                               | -2.93376 |
| hsa04022 | cGMP-PKG signaling pathway                               | -2.75027 |
| hsa04390 | Hippo signaling pathway                                  | -2.73763 |
| hsa04340 | Hedgehog signaling pathway                               | -2.25447 |
