# Supplementary material for: Exploring the Antiglioma Mechanisms of Luteolin Based on Network Pharmacology and Experimental Verification
Source: Evid Based Complement Alternat Med. 2021 Nov 27;2021:7765658. doi: 10.1155/2021/7765658 (PMC8643232; doi:10.1155/2021/7765658)
Supplement: Supplementary Materials — The Supplementary Materials to this article include the following: the prediction targets of luteolin, the prediction targets of glioma, the signaling pathways in KEGG enrichment analysis of glioma-related targets, the result of GO enrichment analysis, and the 49 signaling pathways in KEGG pathway analysis for the targets of luteolin in glioma cells. [file 7765658.f1.zip]

Archive with 2 entries (2 files):
- 7765658.f1/Graphical abstract.pdf
- 7765658.f1/Supplementary Material (2).pdf
